# Supplementary material
Source: PubMed Central journal article supplement (PMC7121246)

**EA4.** BSE images of chondrules, showing regions analyzed by SIMS Al-Mg isotope systematics. Unless otherwise noted, labeled regions of interest and subsequent SIMS pits are those of plagioclase. Olivine (Ol) and low-Ca pyroxene (LPx) are designated as such. In the images of SIMS pits, scalebars are 10 microns.

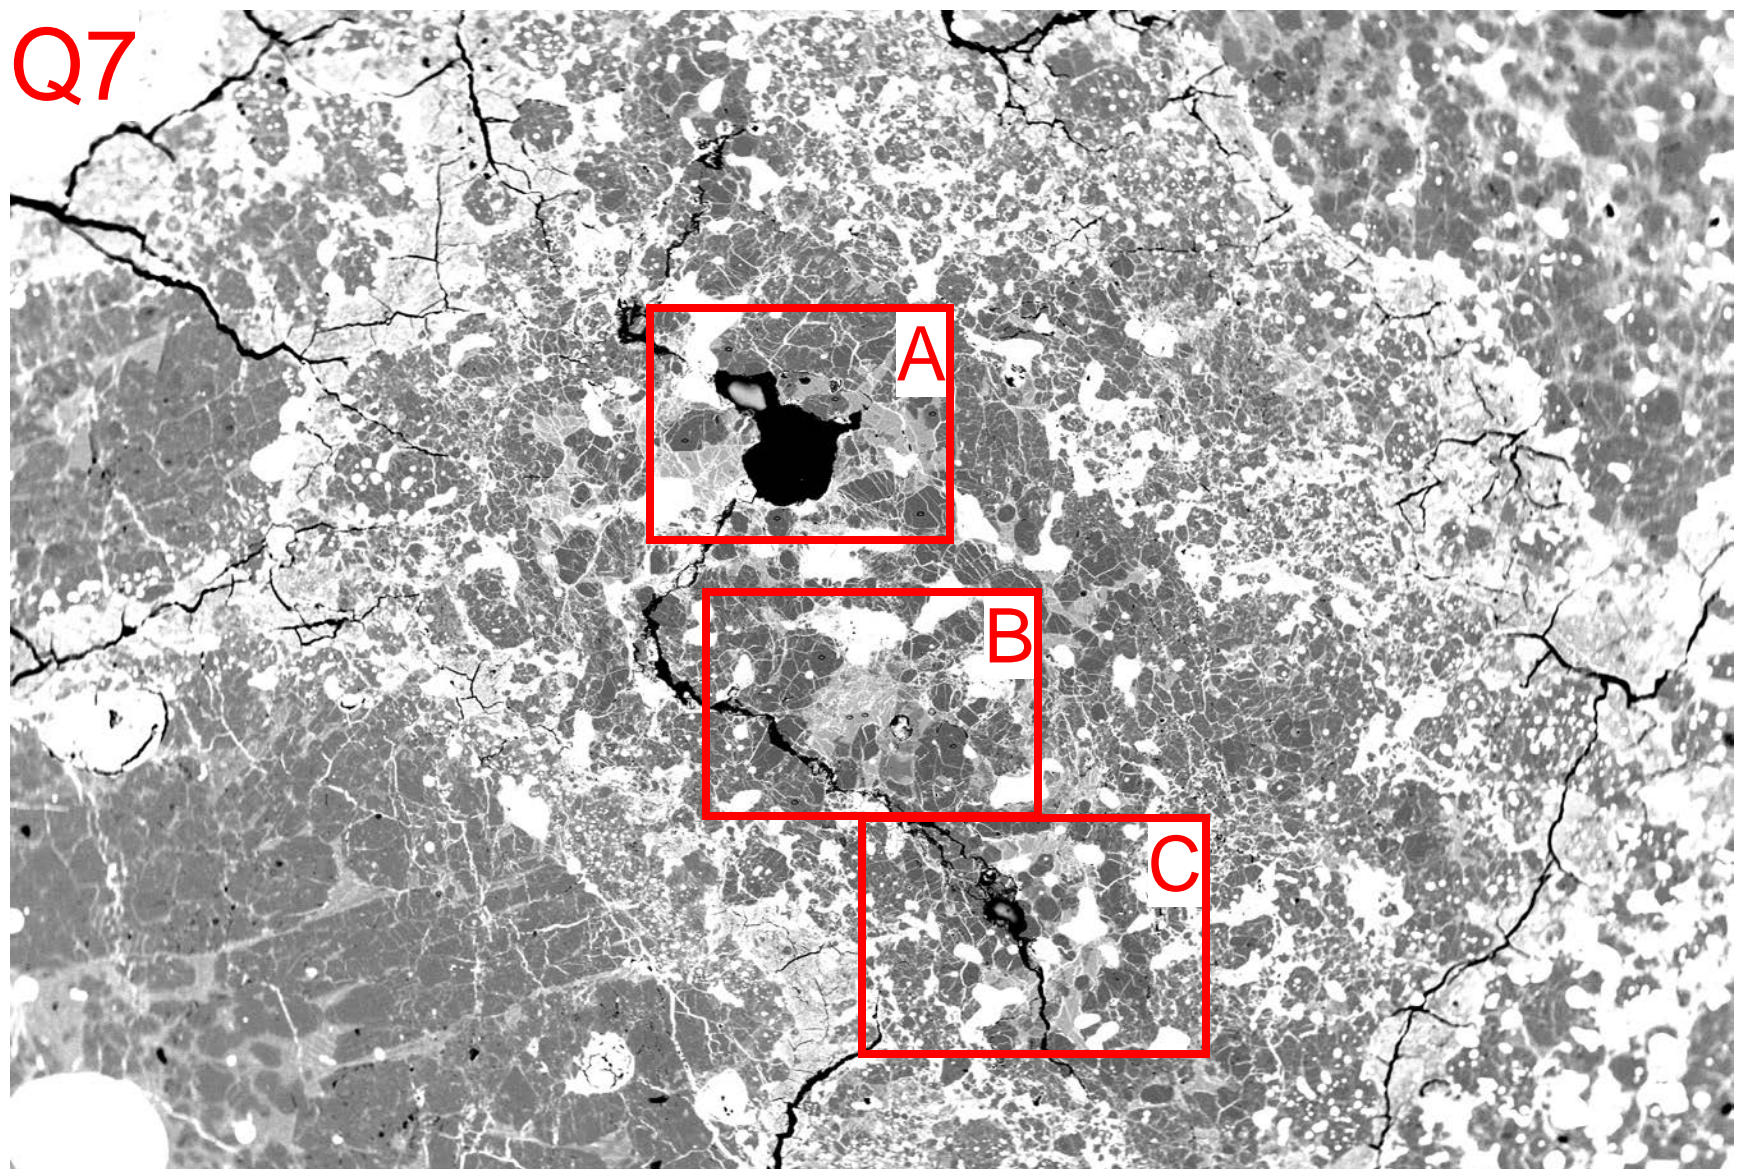

Q7

A

B

C



Q7. A

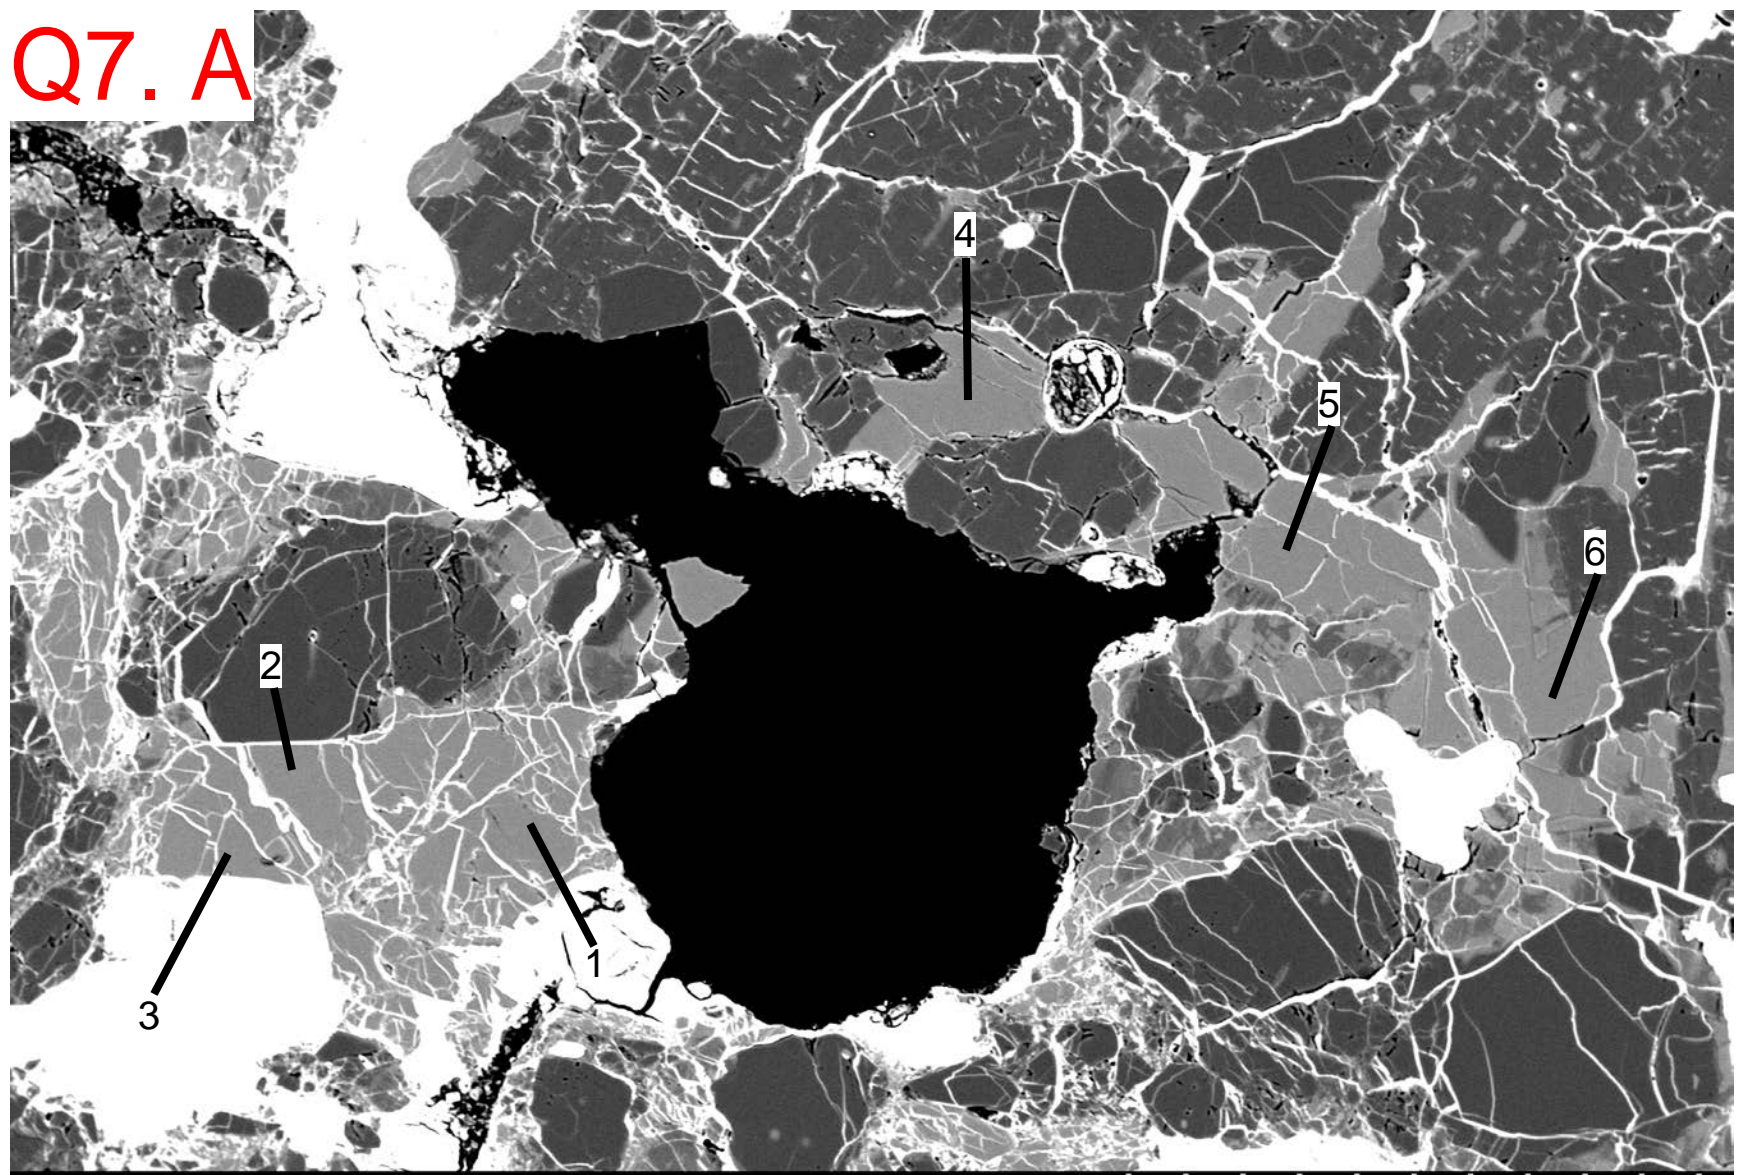



Q7. B

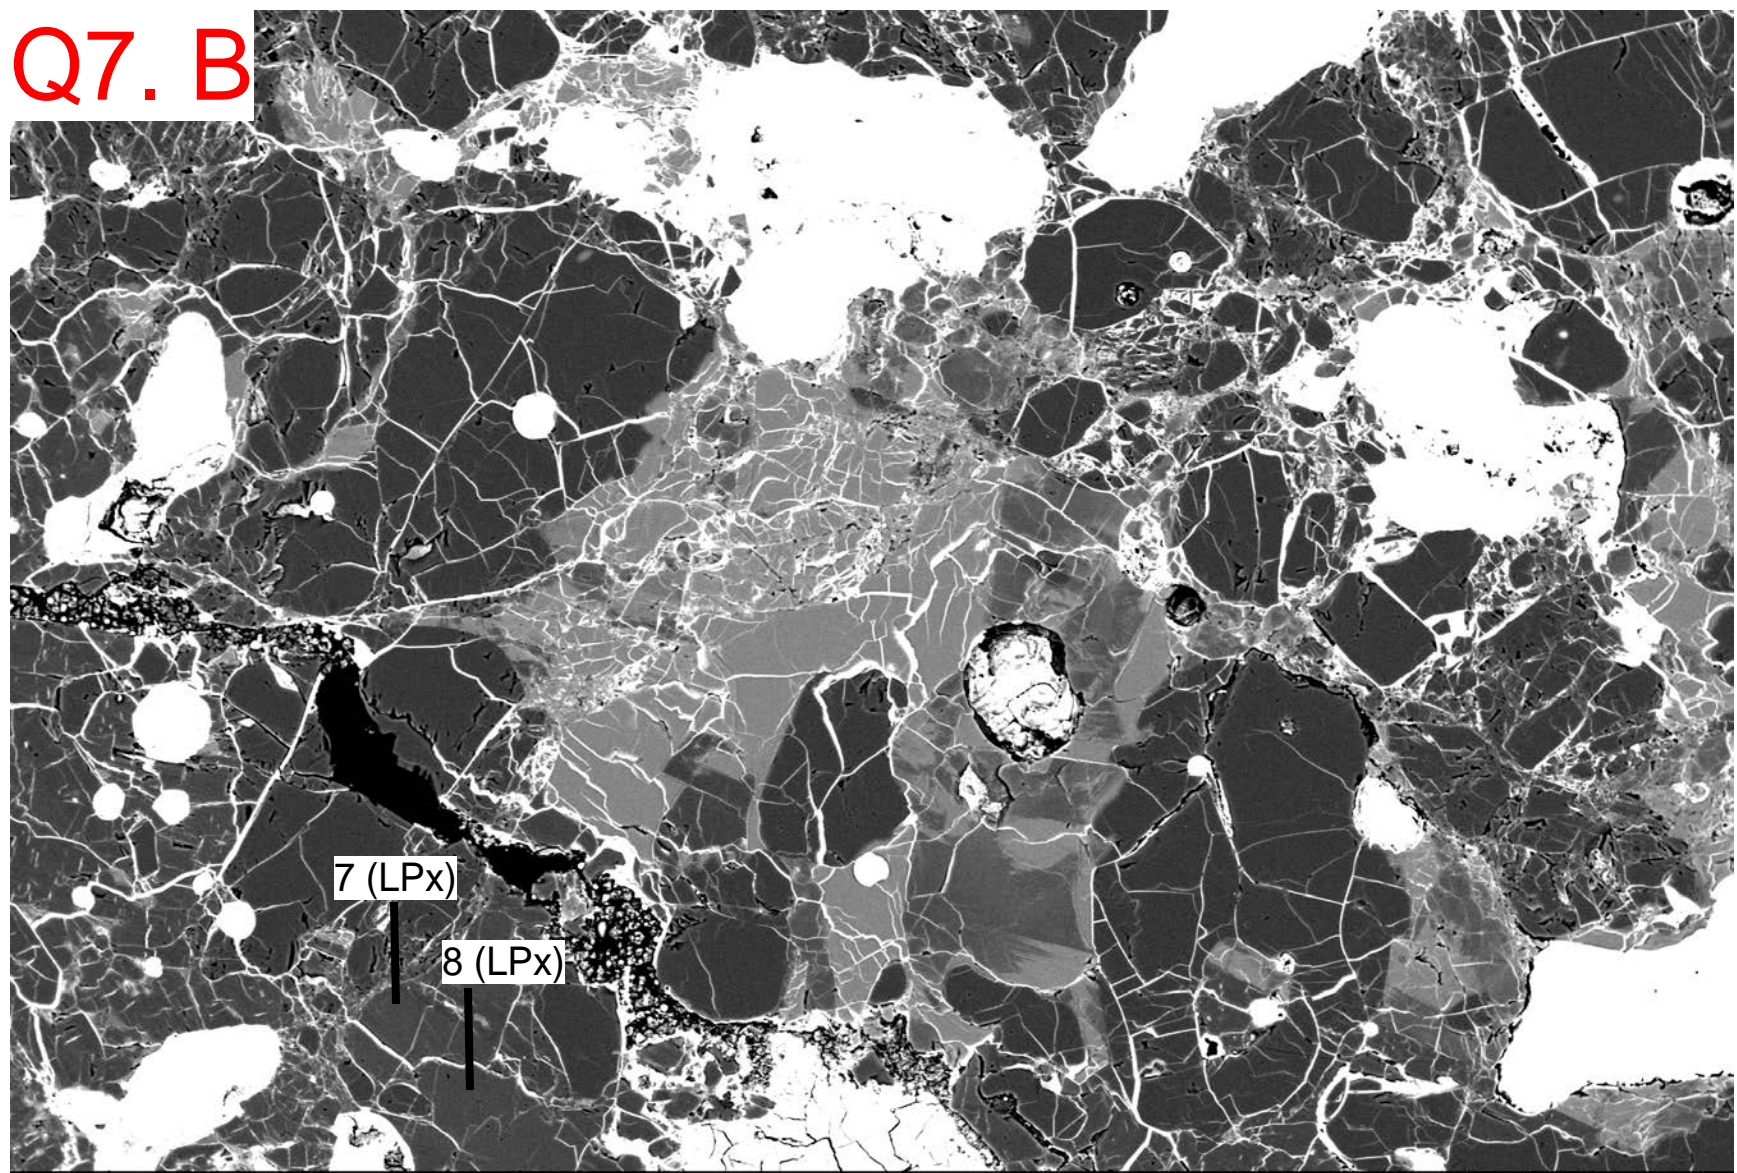

7 (LPx)

8 (LPx)

Q7 15.0kV x210 BSECOMP

200um



Q7. C

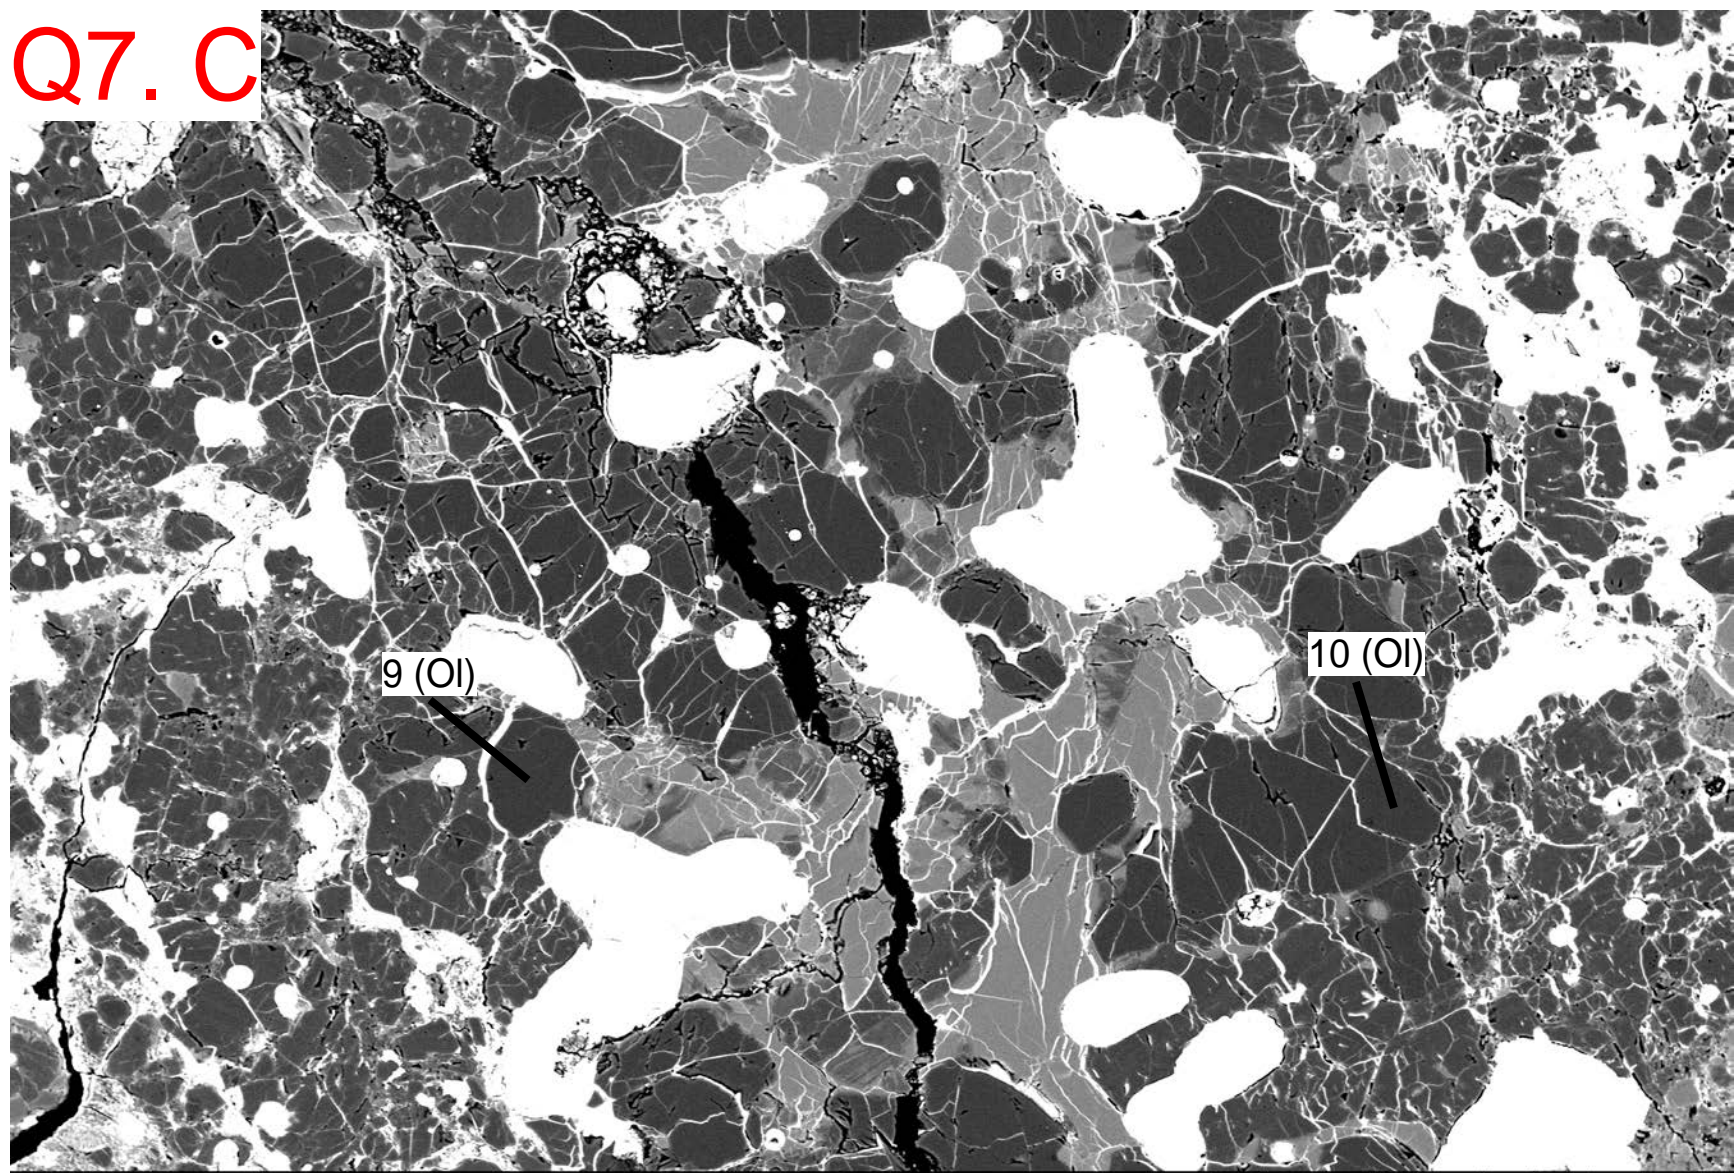

9 (OI)

10 (OI)

Q7 15.0kV x200 BSECOMP

200um

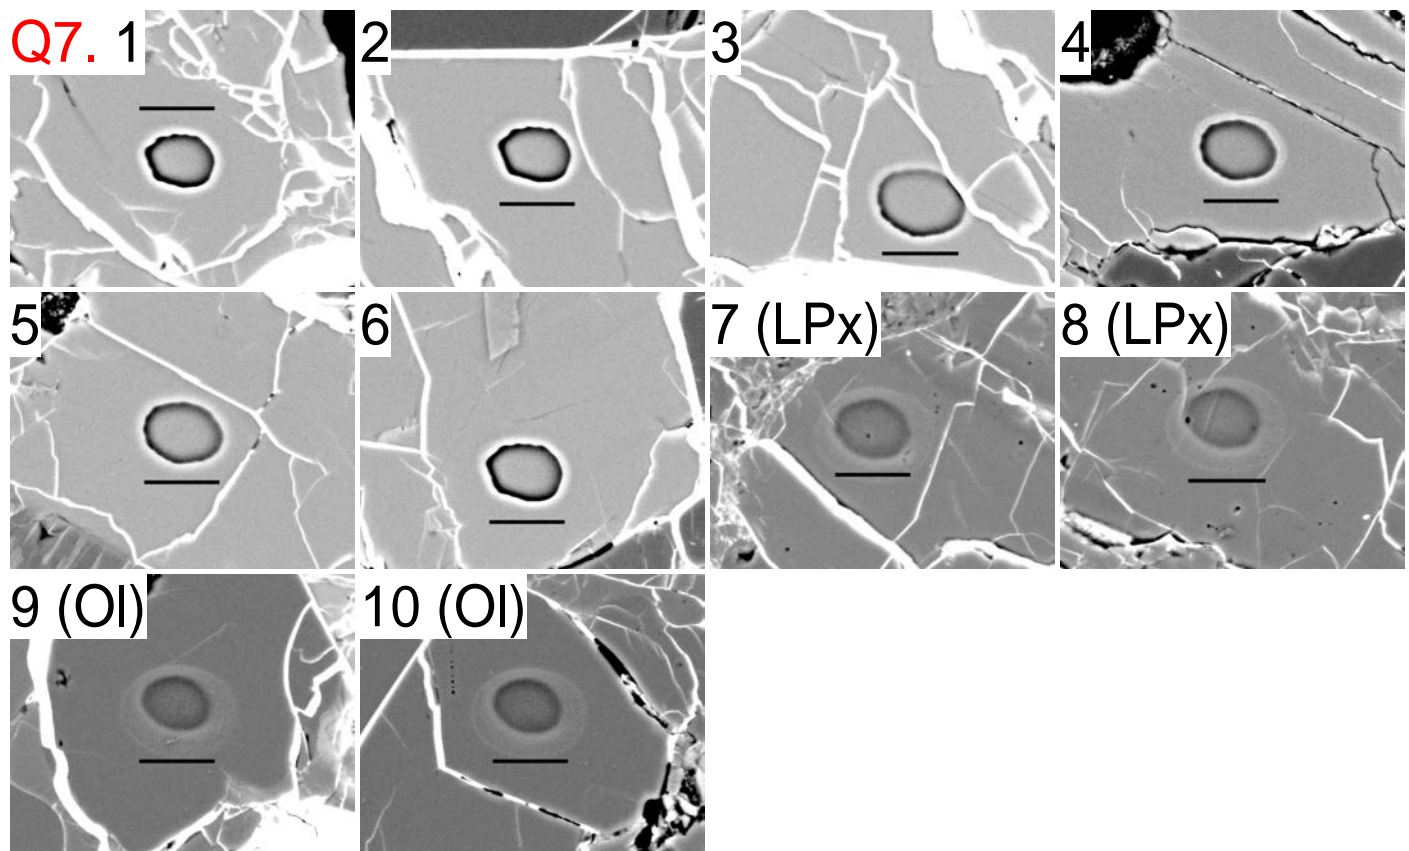



Q13

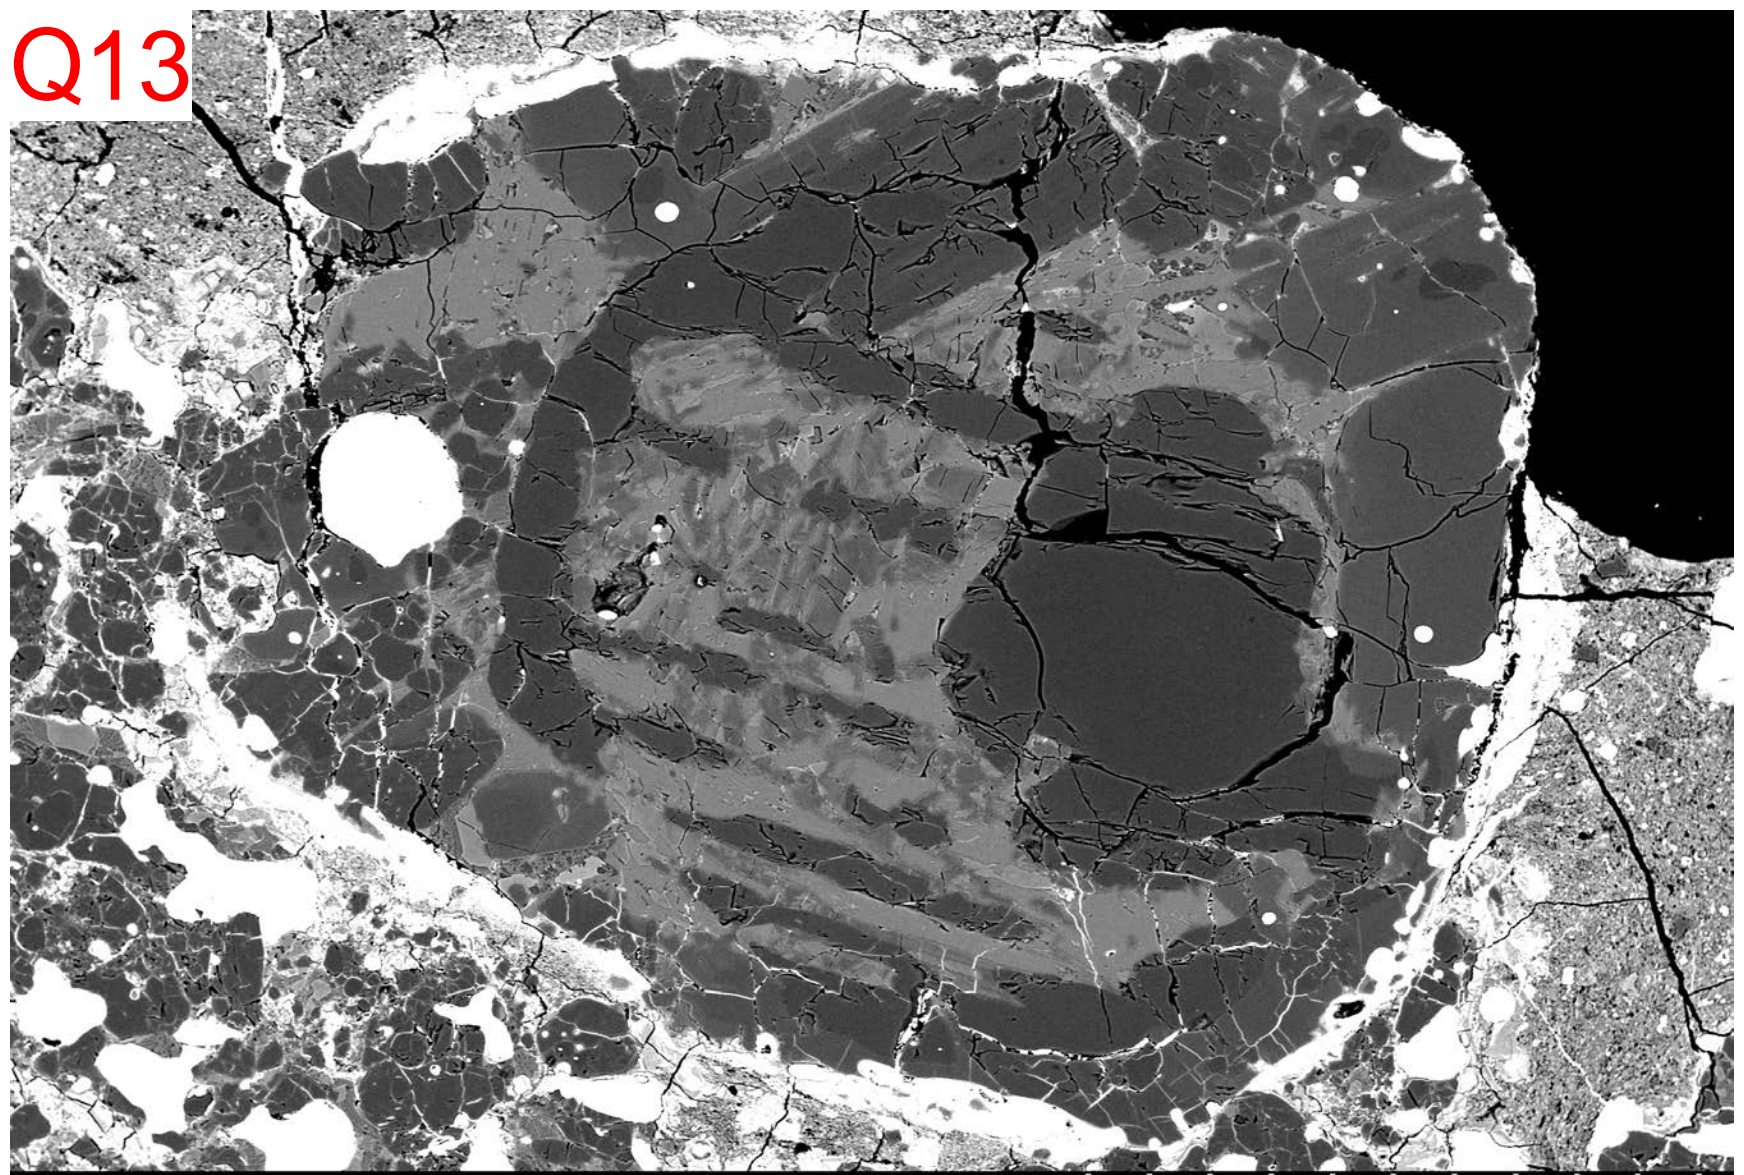

Q13 15.0kV x150 BSECOMP 300um



Q13

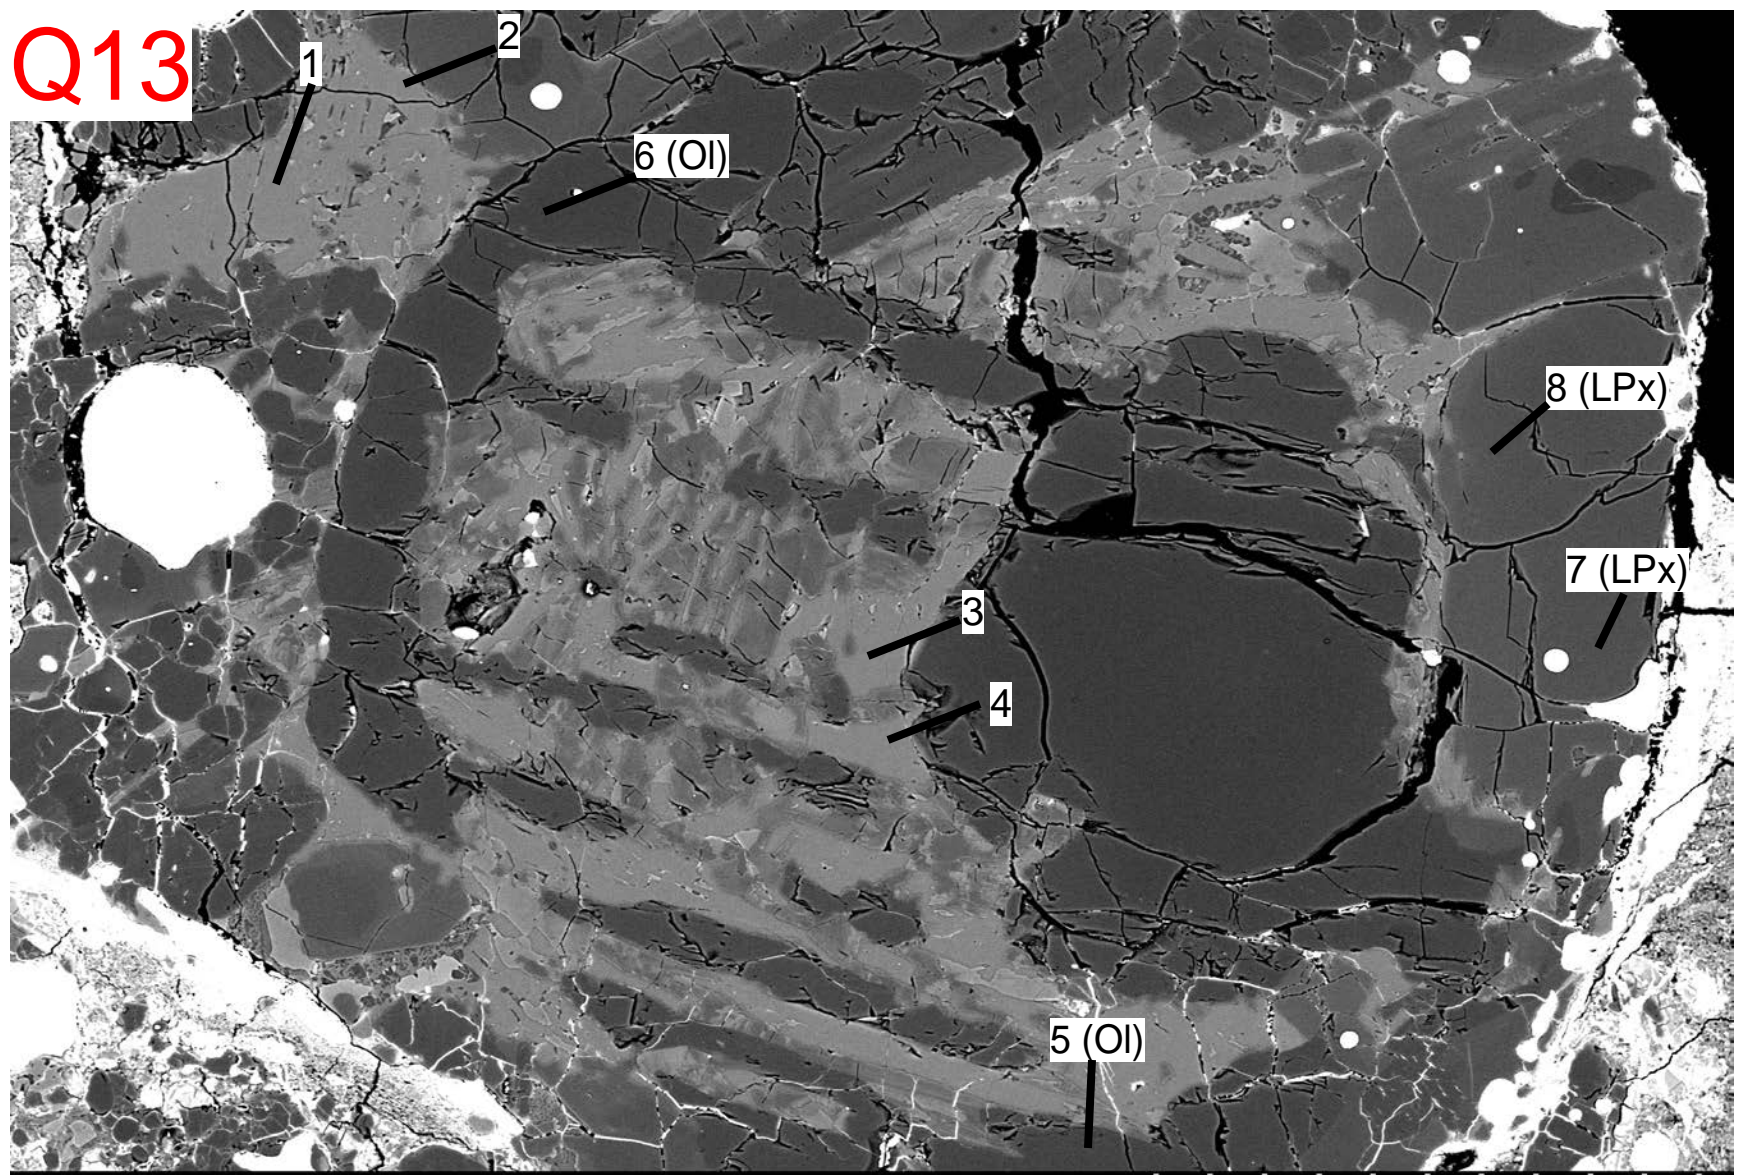

Q13 15.0kV x200 BSECOMP

200um



Q13. 1

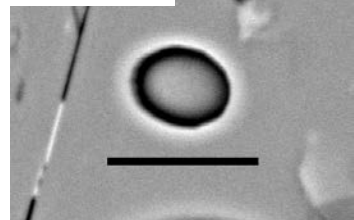

2

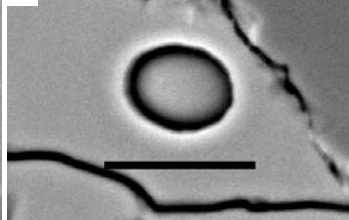

3

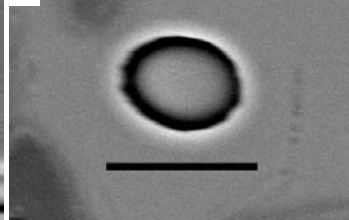

4

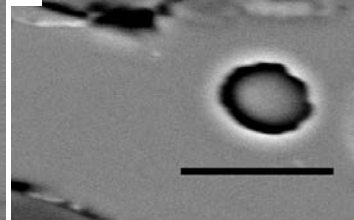

5 (OI)

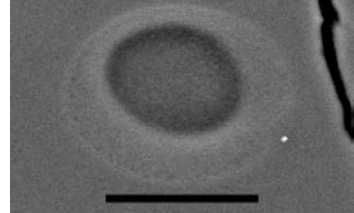

6 (OI)

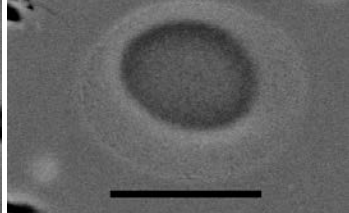

7 (LPx)

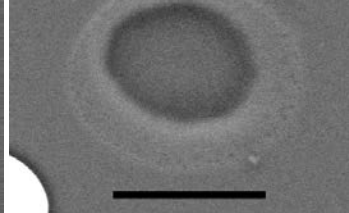

8 (LPx)

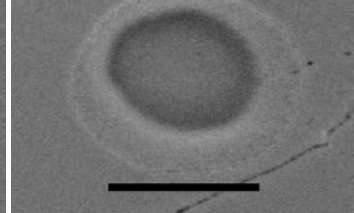

Q15

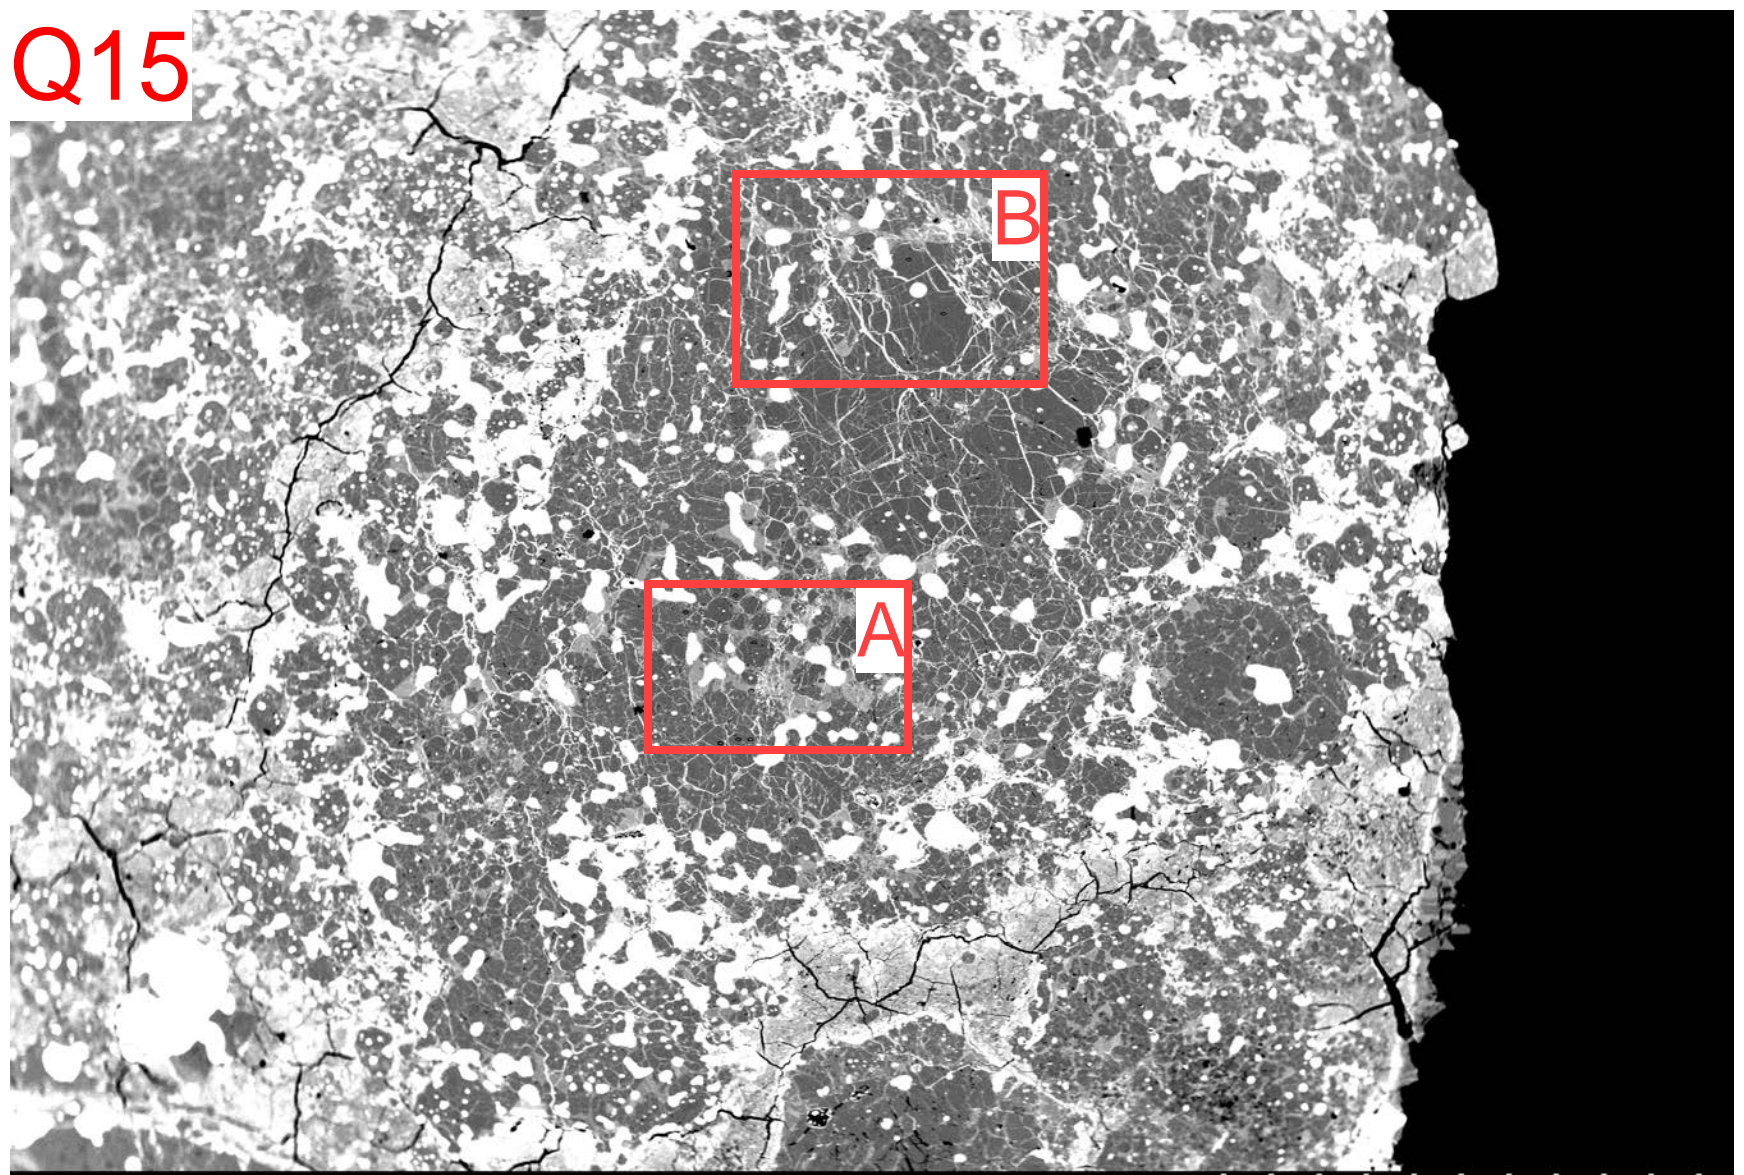

A

B

Q15 15.0kV x35 BSECOMP

1.00mm



Q15. A

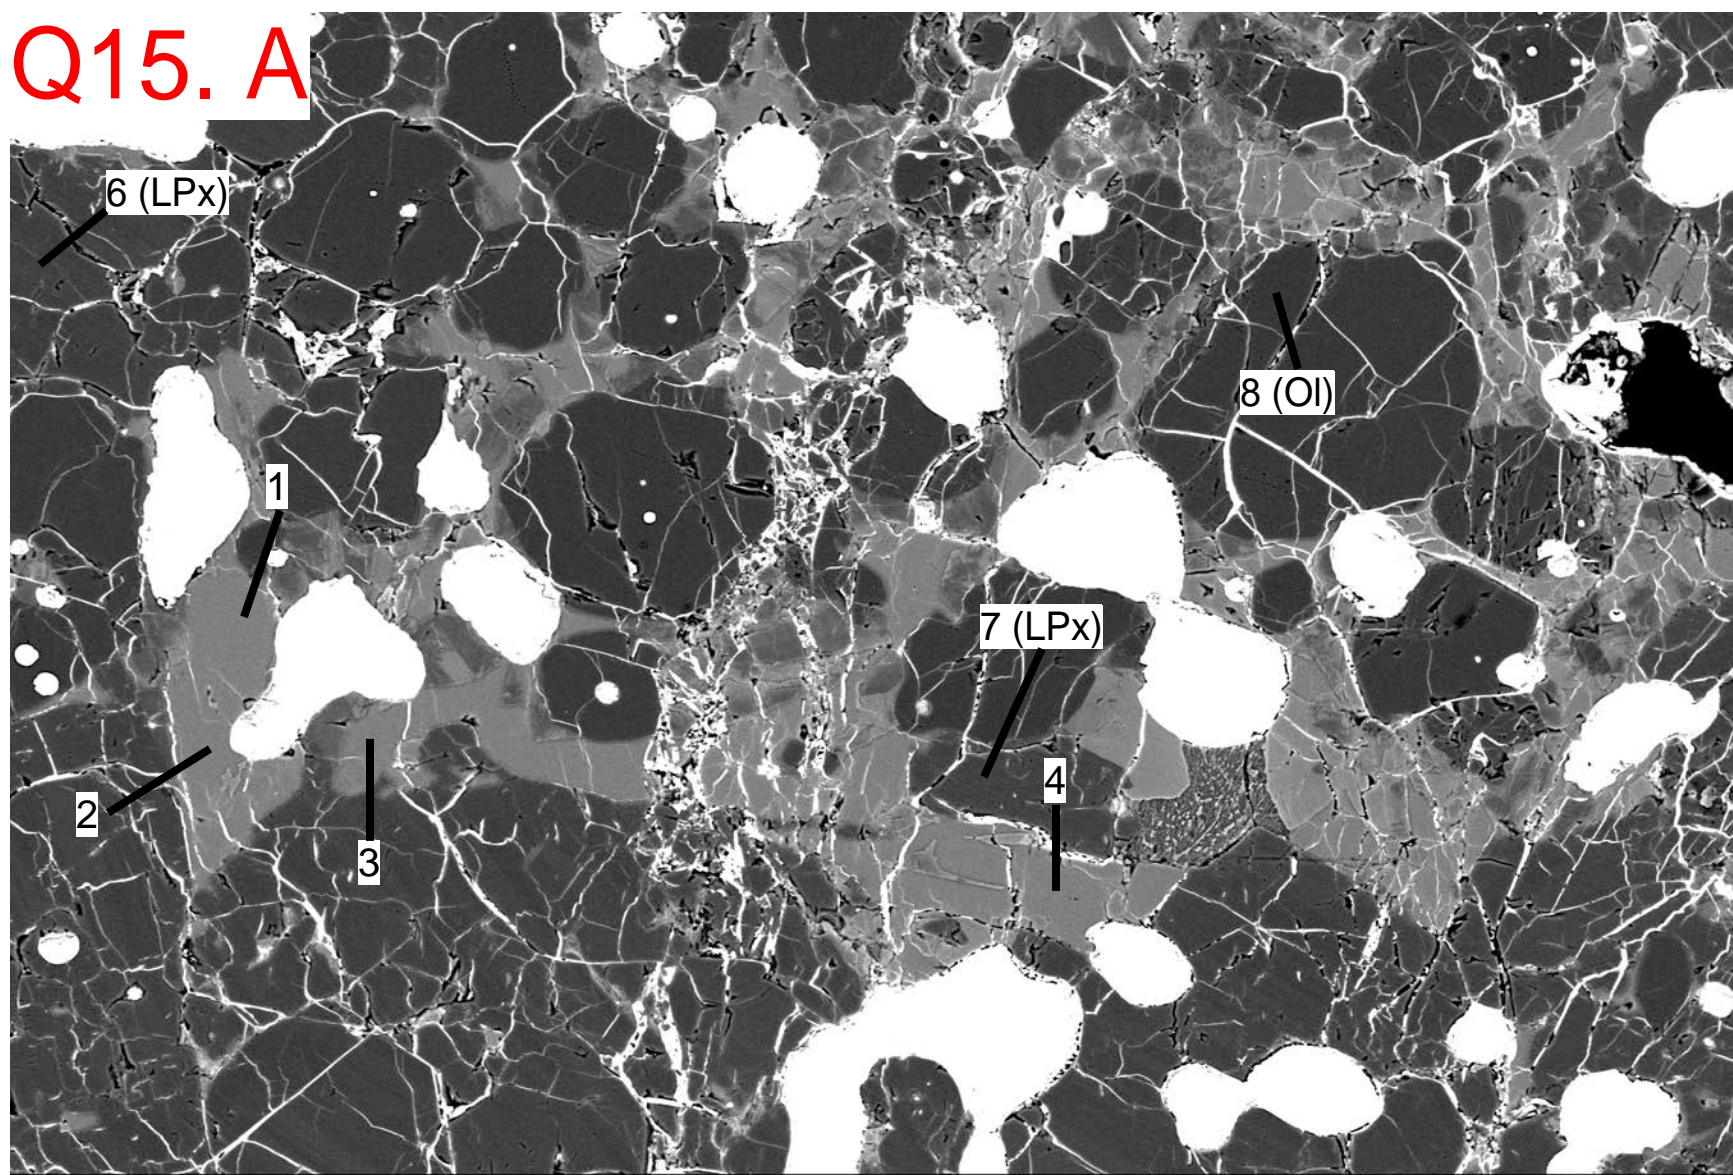

6 (LPx)

1

8 (Ol)

7 (LPx)

2

3

4

Q15 15.0kV x250 BSECOMP

200um



Q15. B

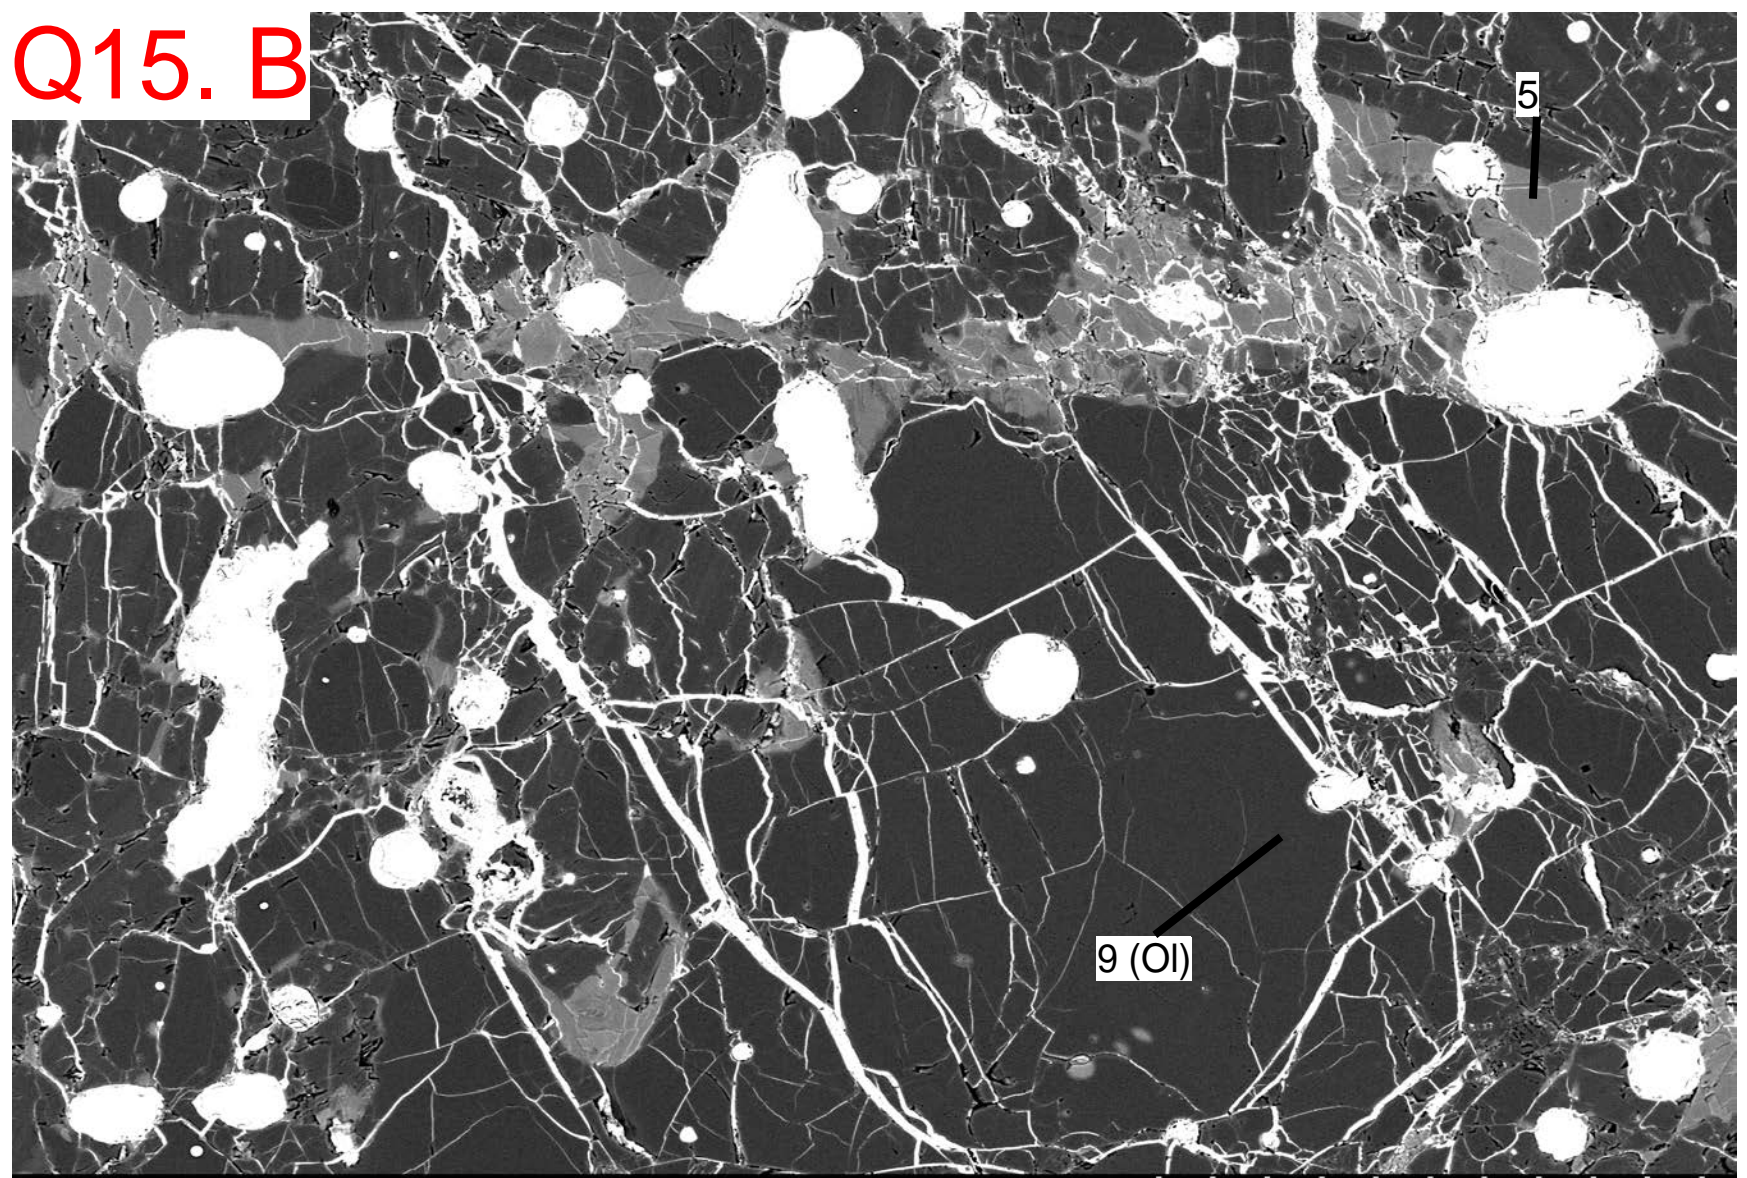

5

9 (OI)



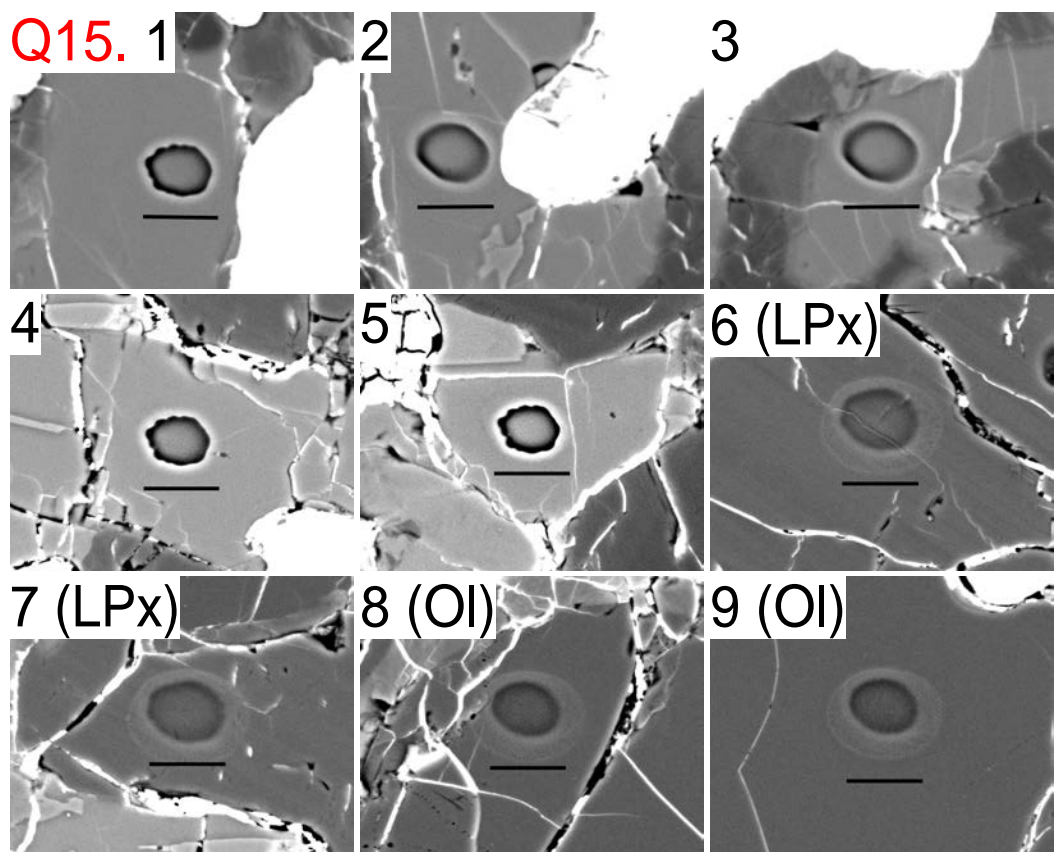

Q16

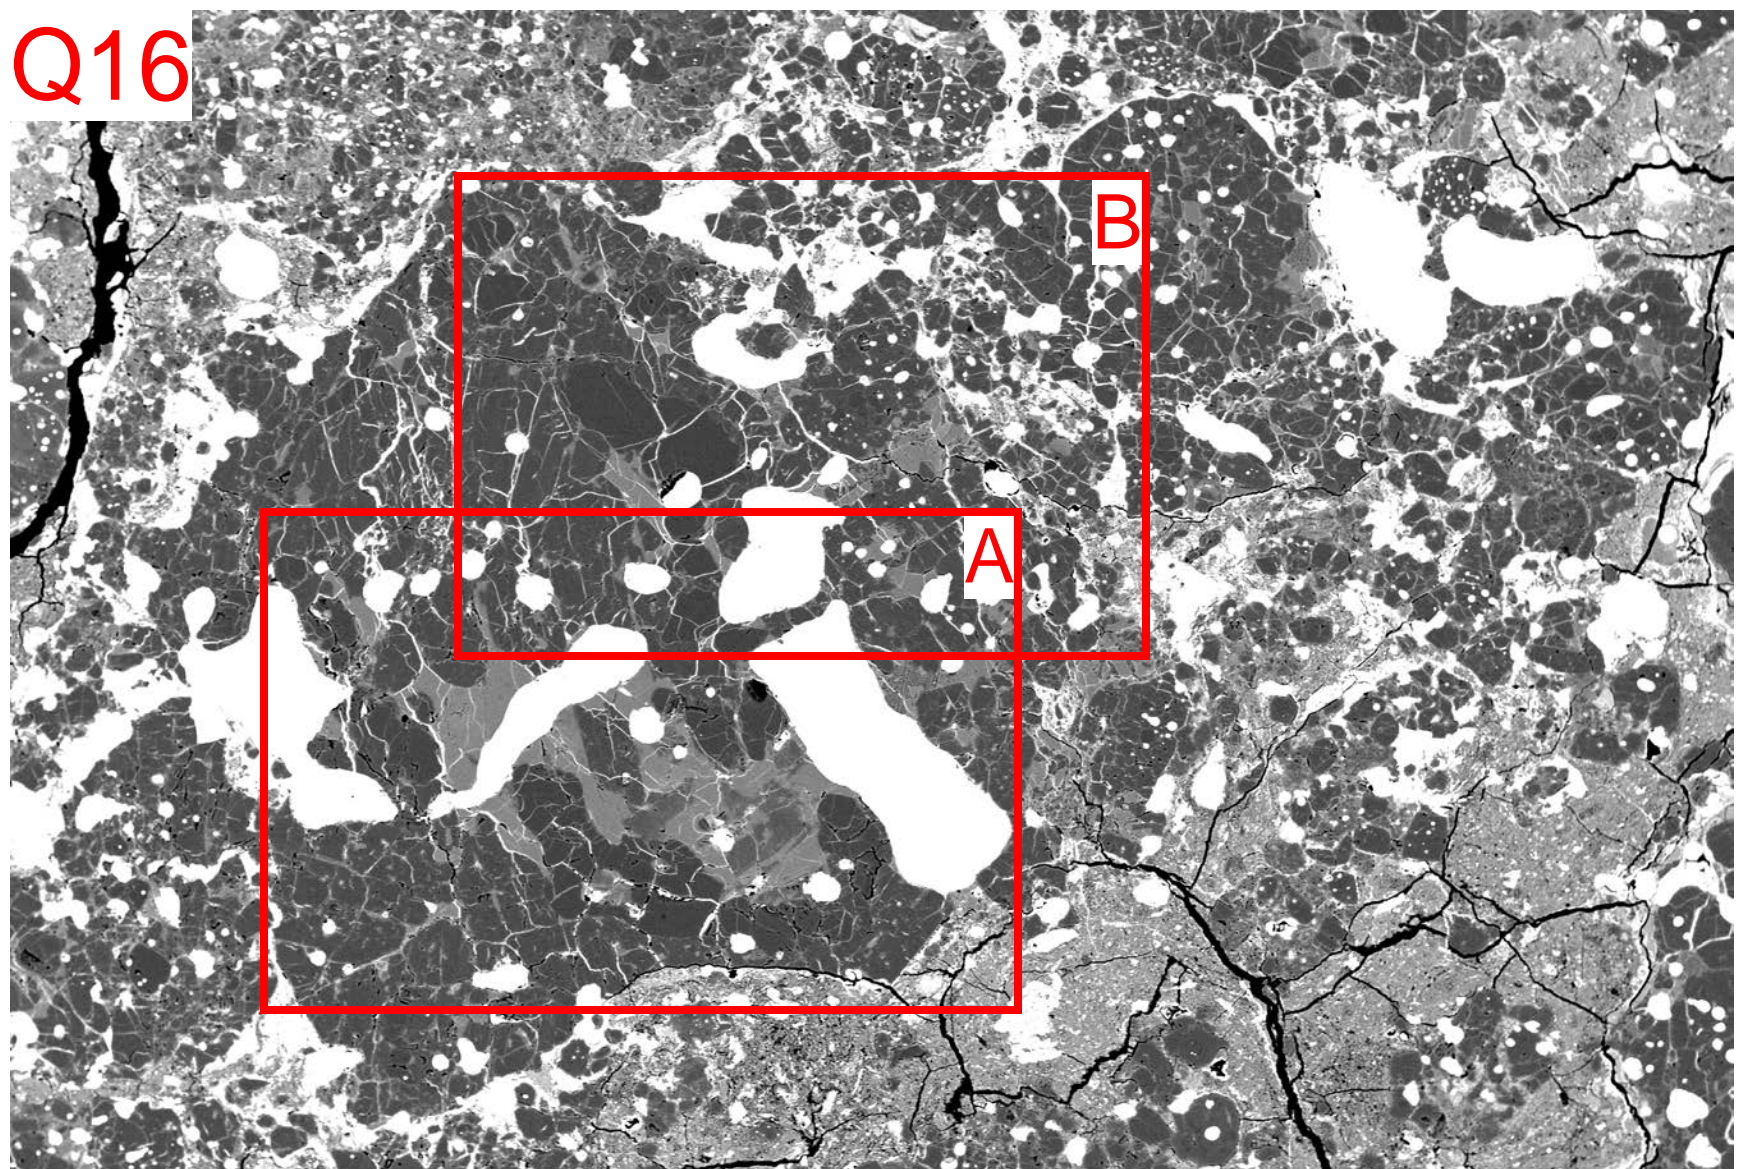

A

B



Q16. A

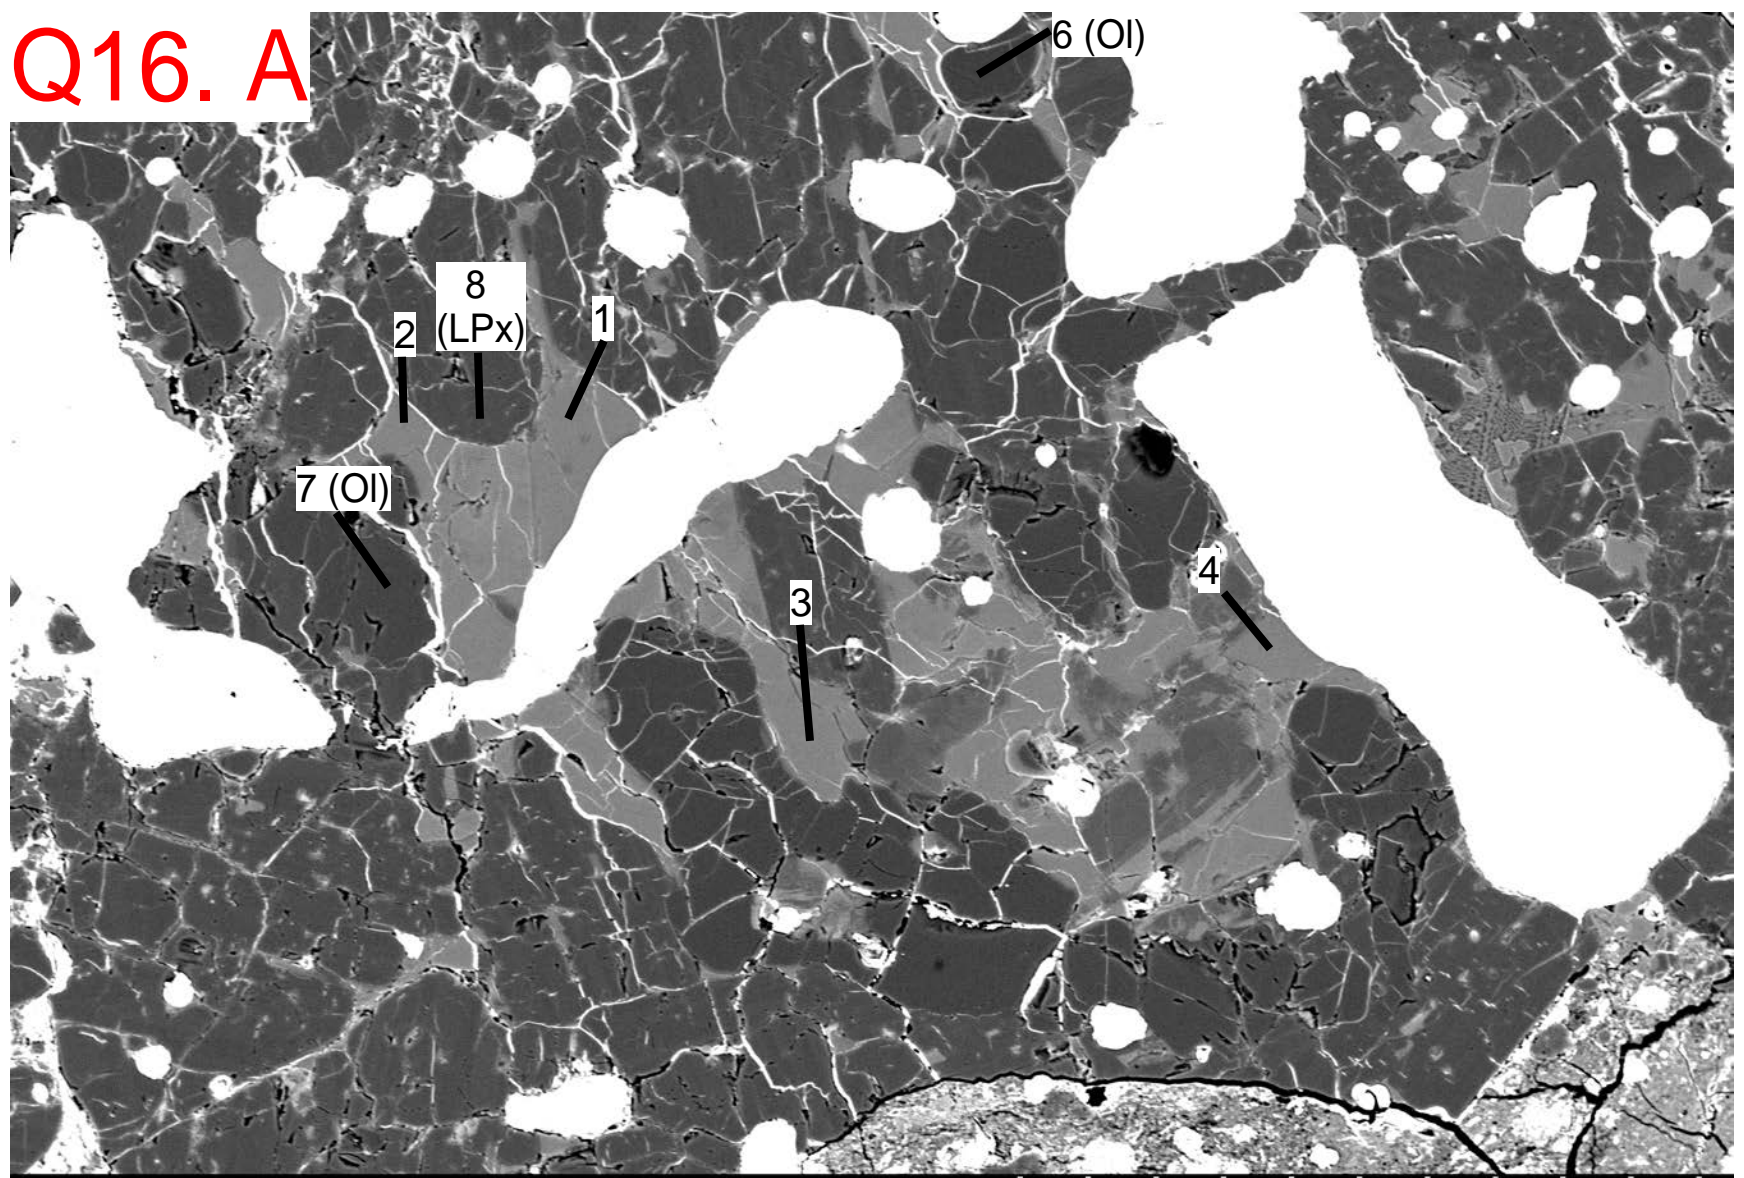



Q16. B

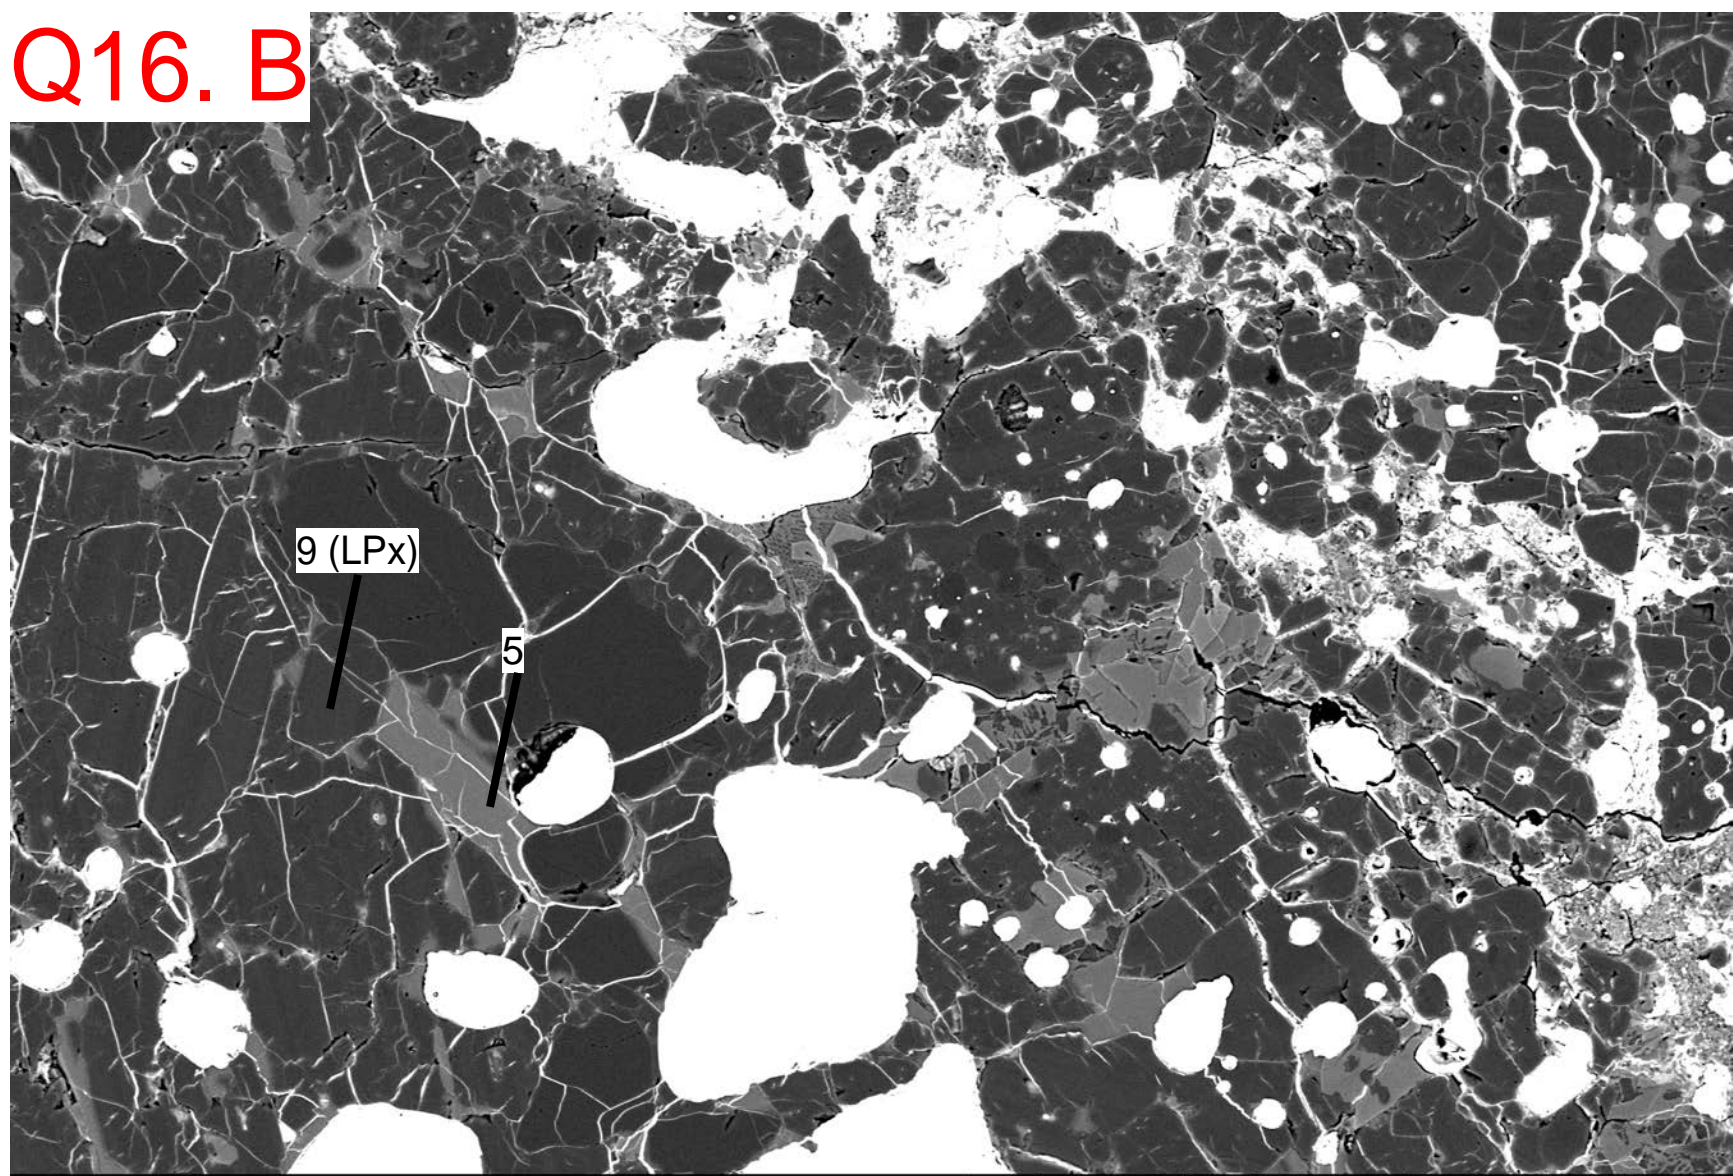

Q16 15.0kV x270 BSECOMP

200um



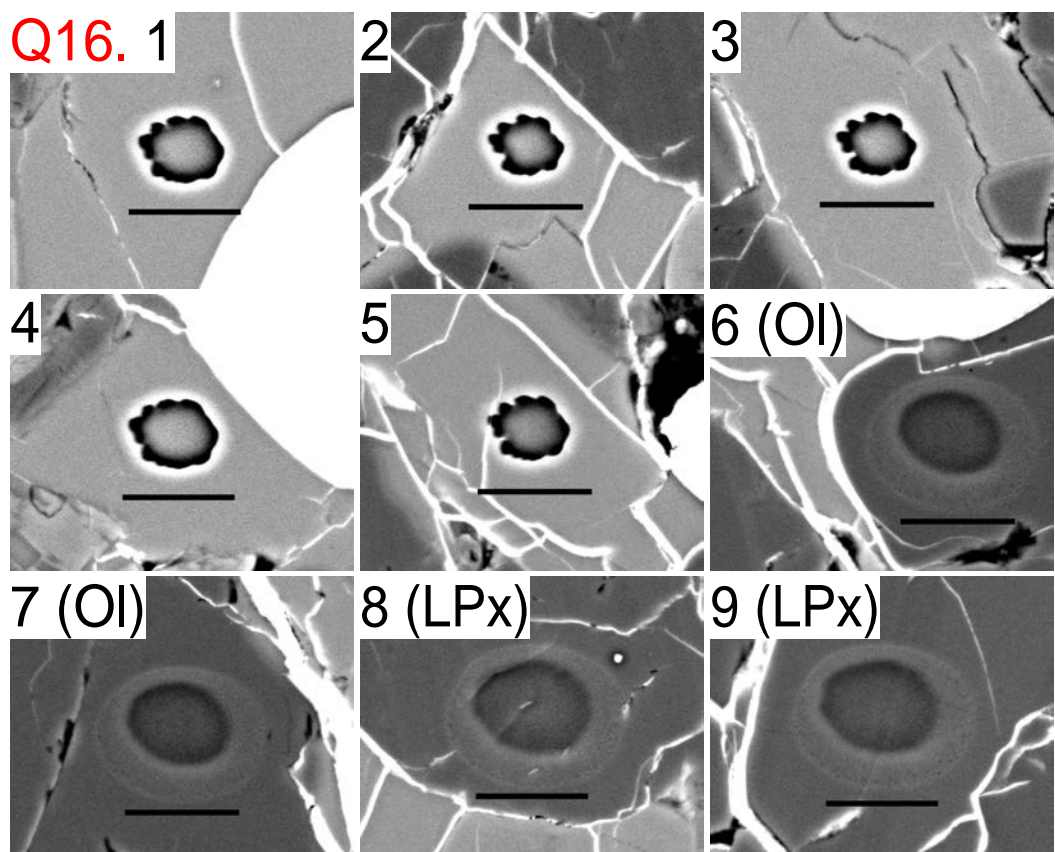

Q19

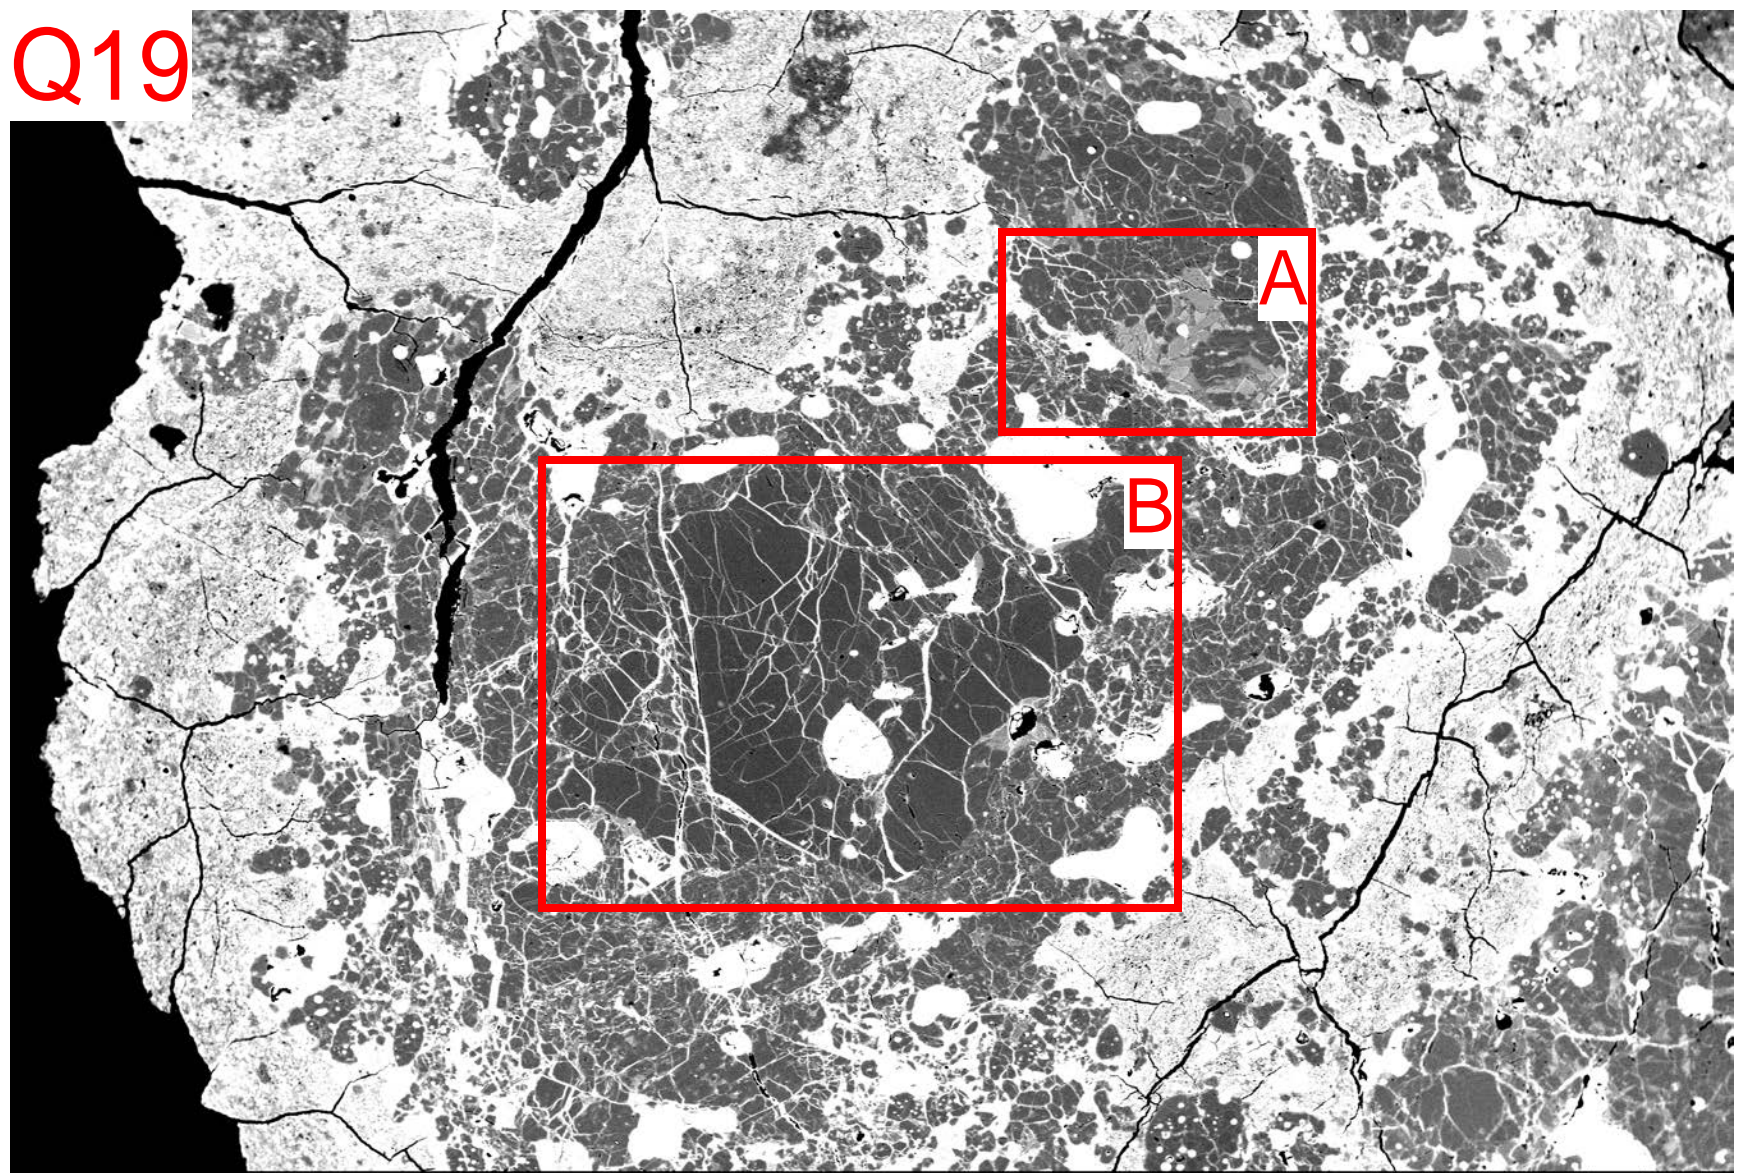

A

B

Q19 15.0kV x80 BSECOMP

500um



Q19. A

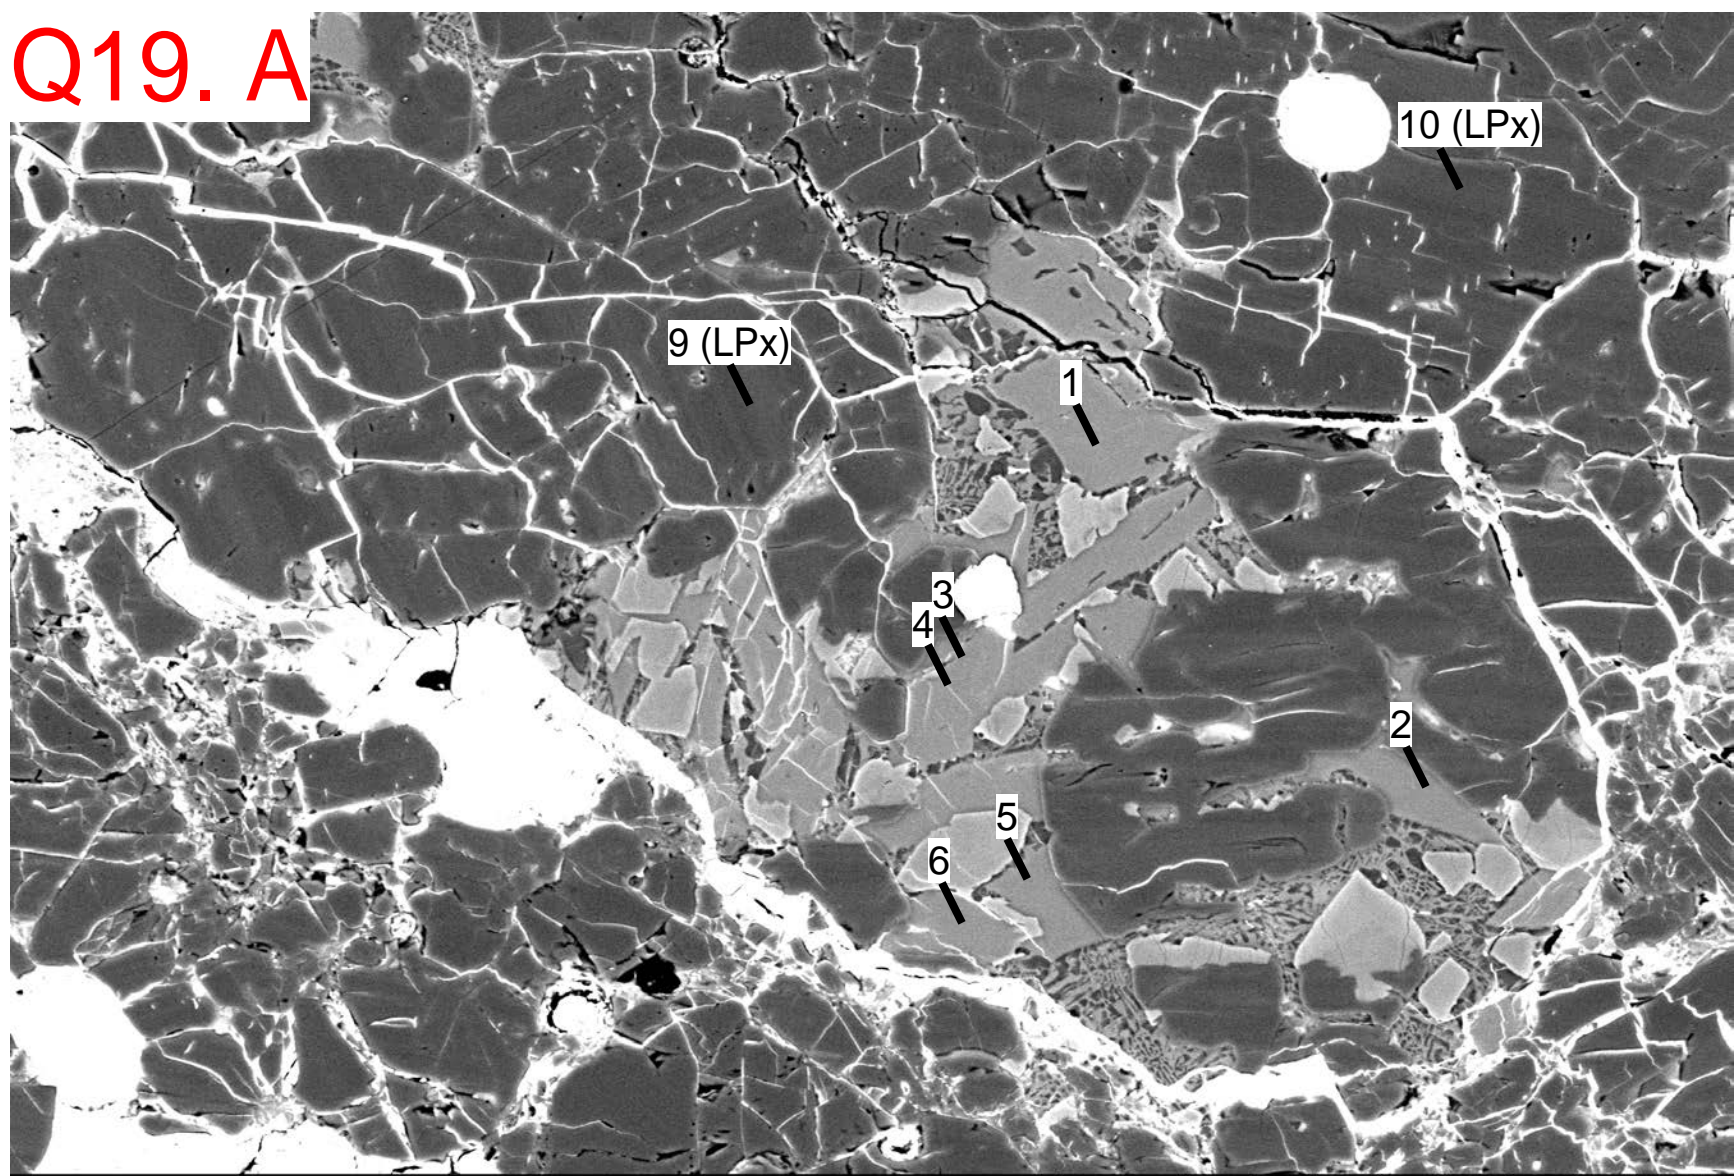

Q19 15.0kV x470 BSECOMP

100um



Q19. B

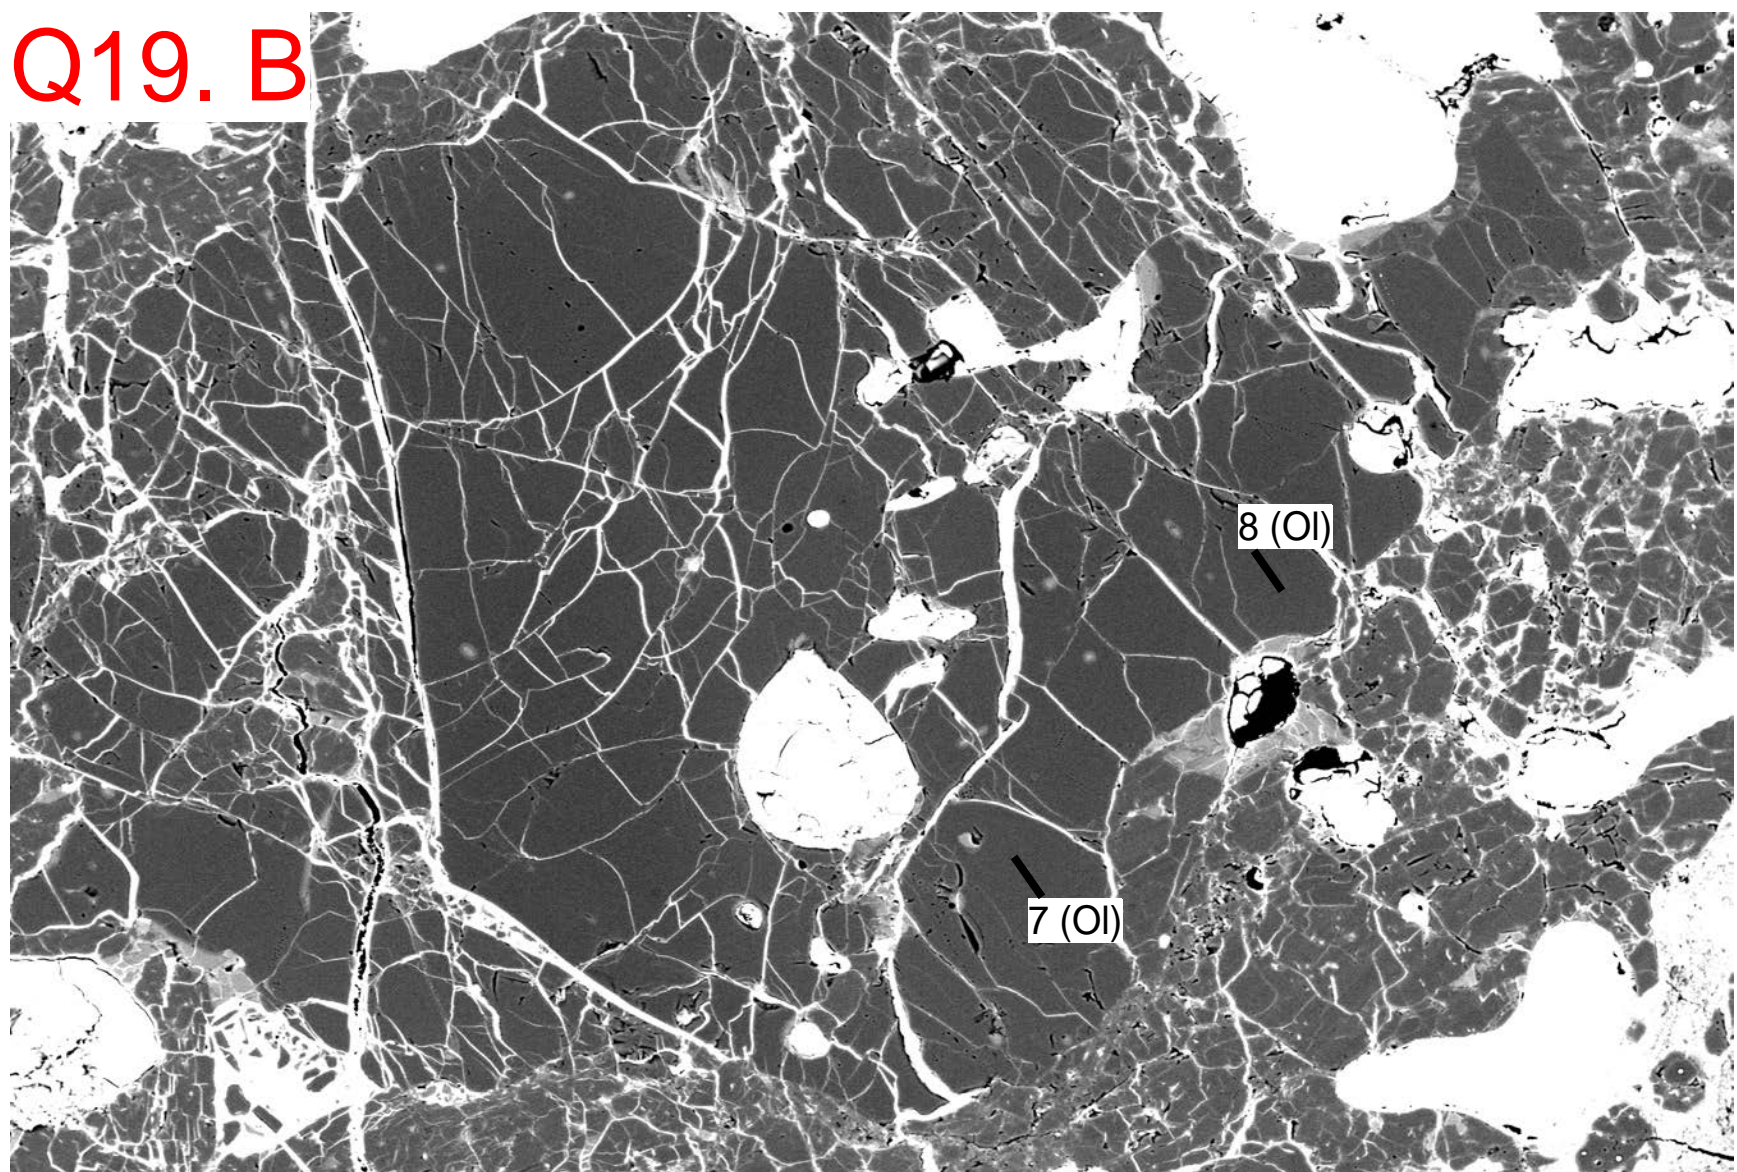

Q19 15.0kV x210 BSECOMP

200um



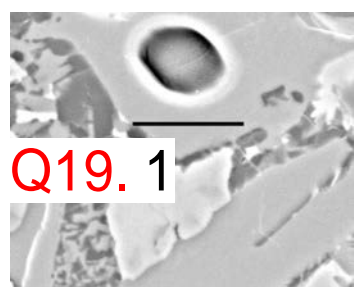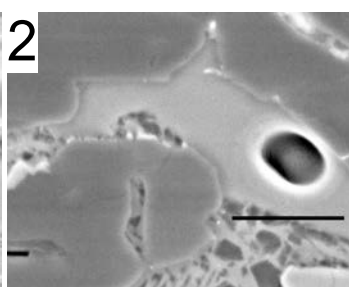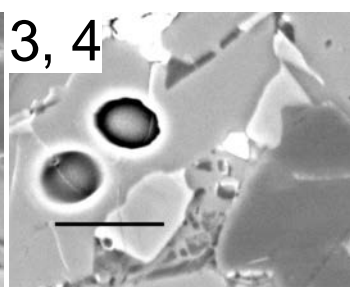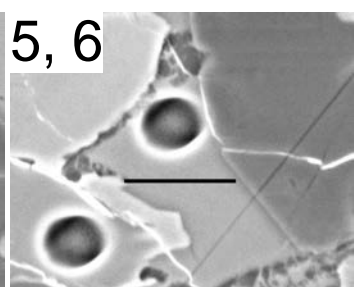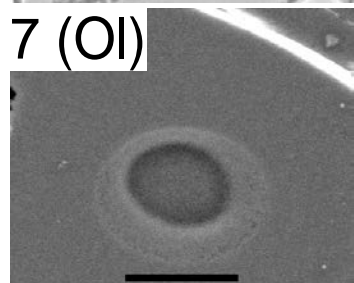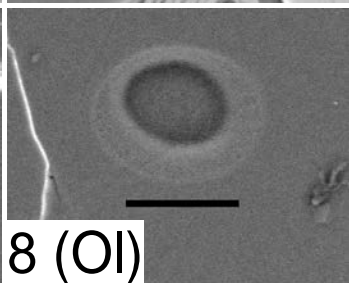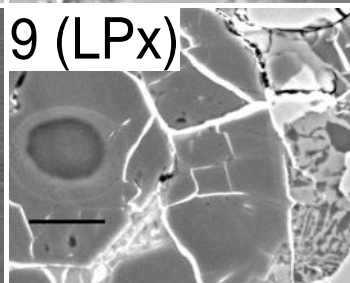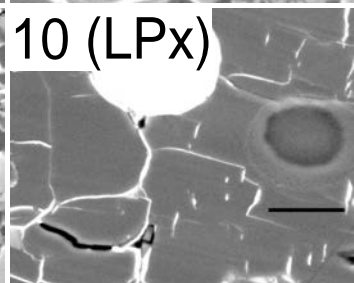

Q35

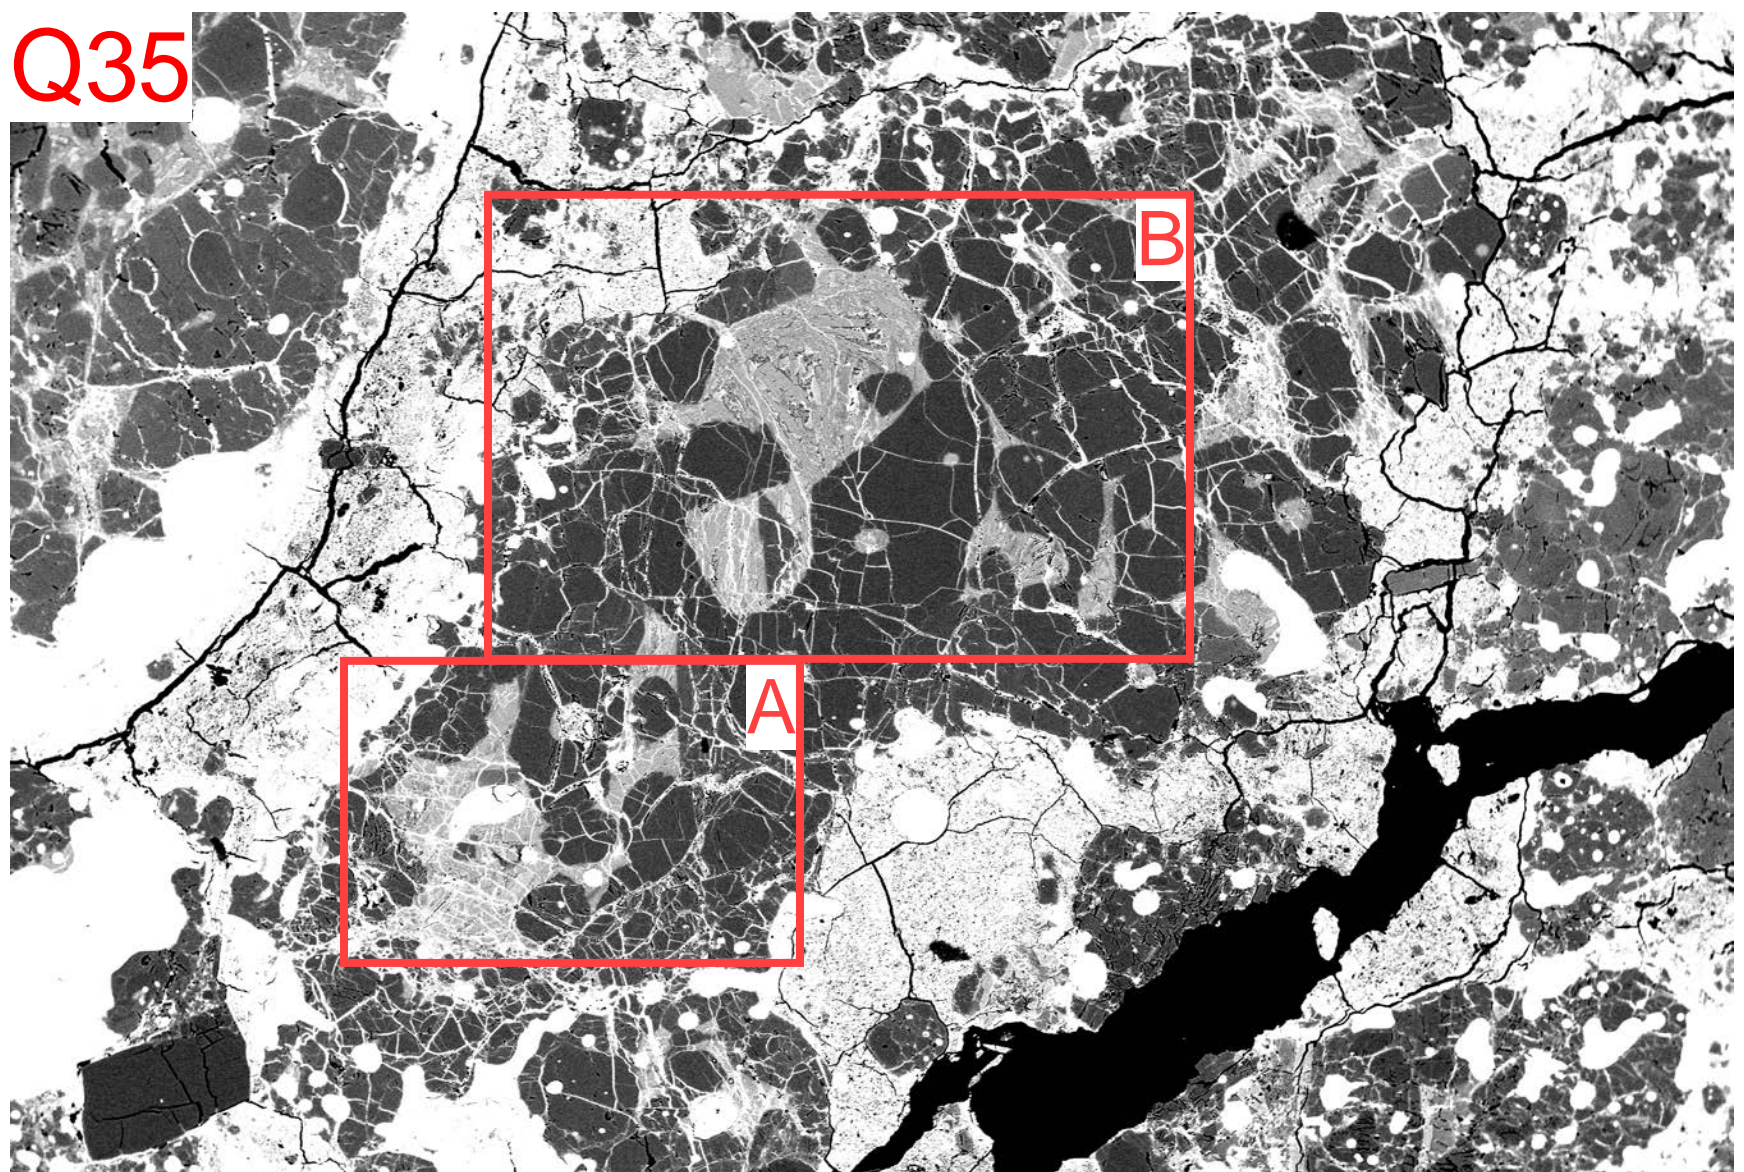

A

B



Q35. A

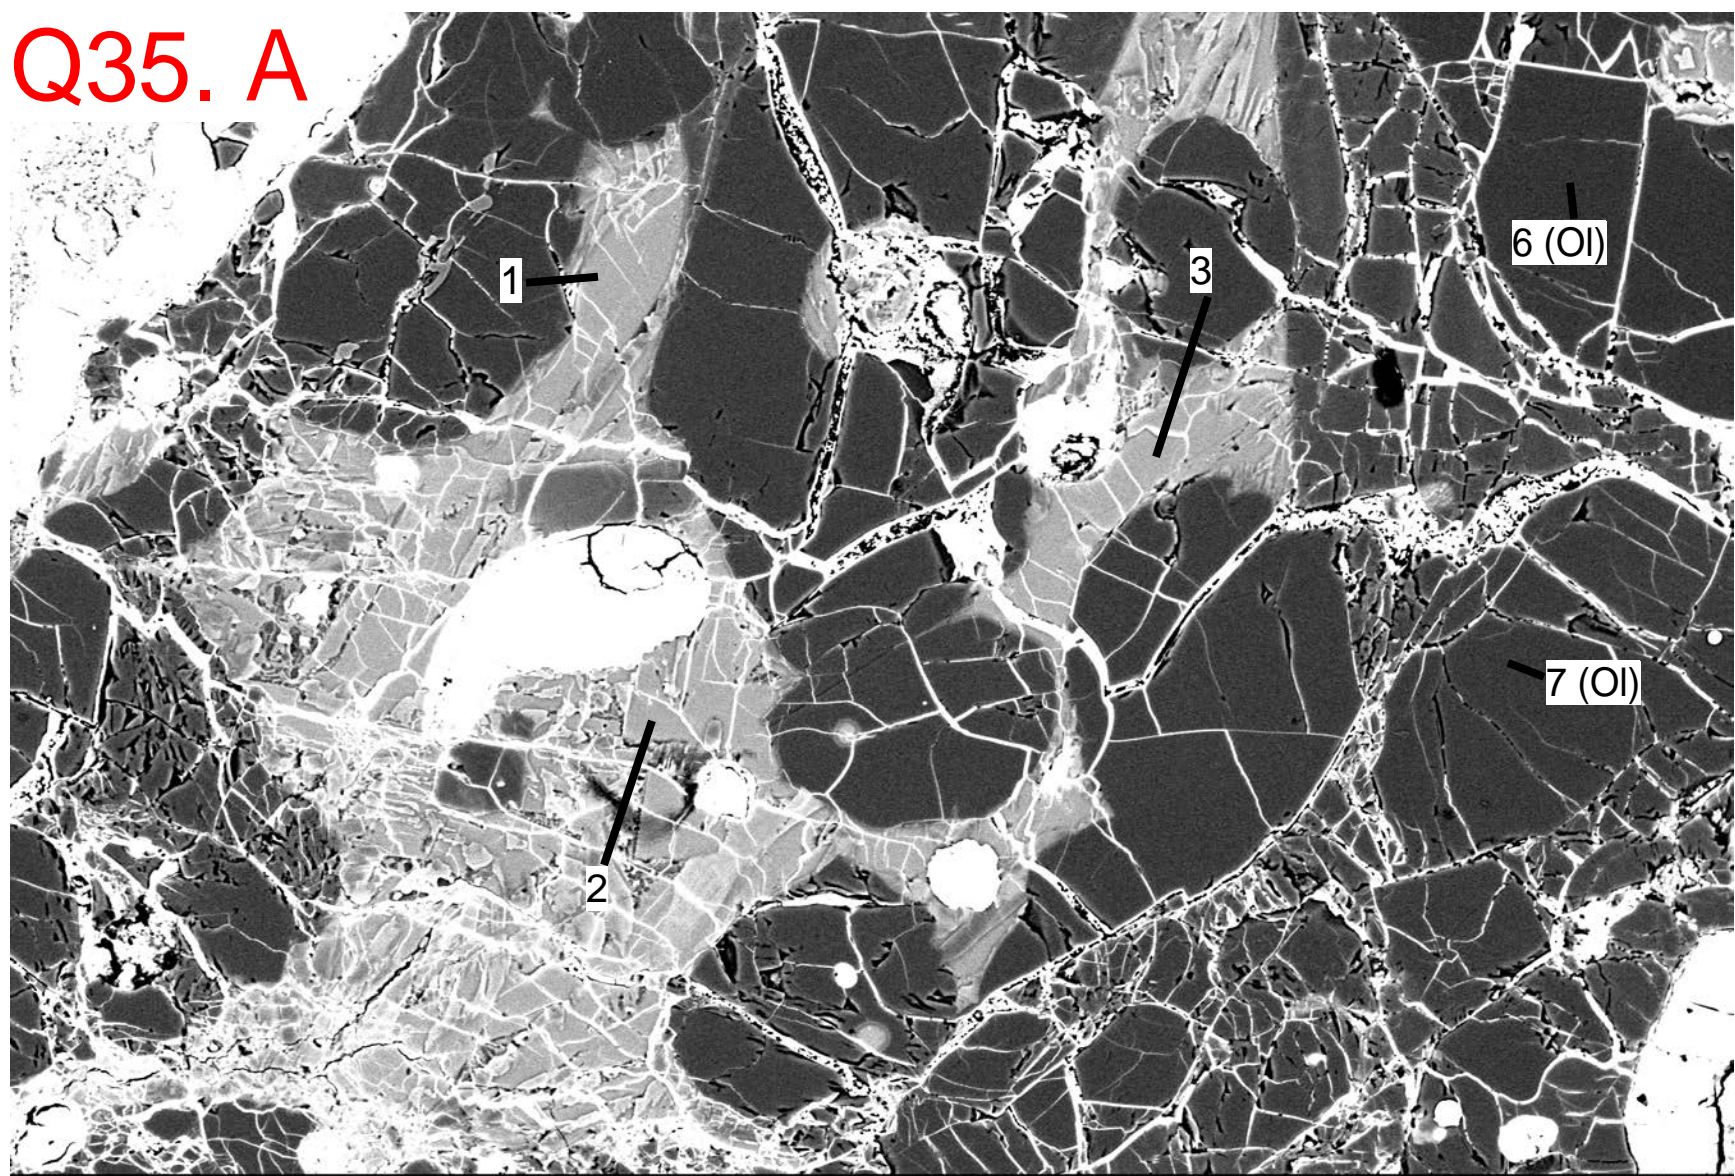

Q35 15.0kV x320 BSECOMP

100um



Q35. B

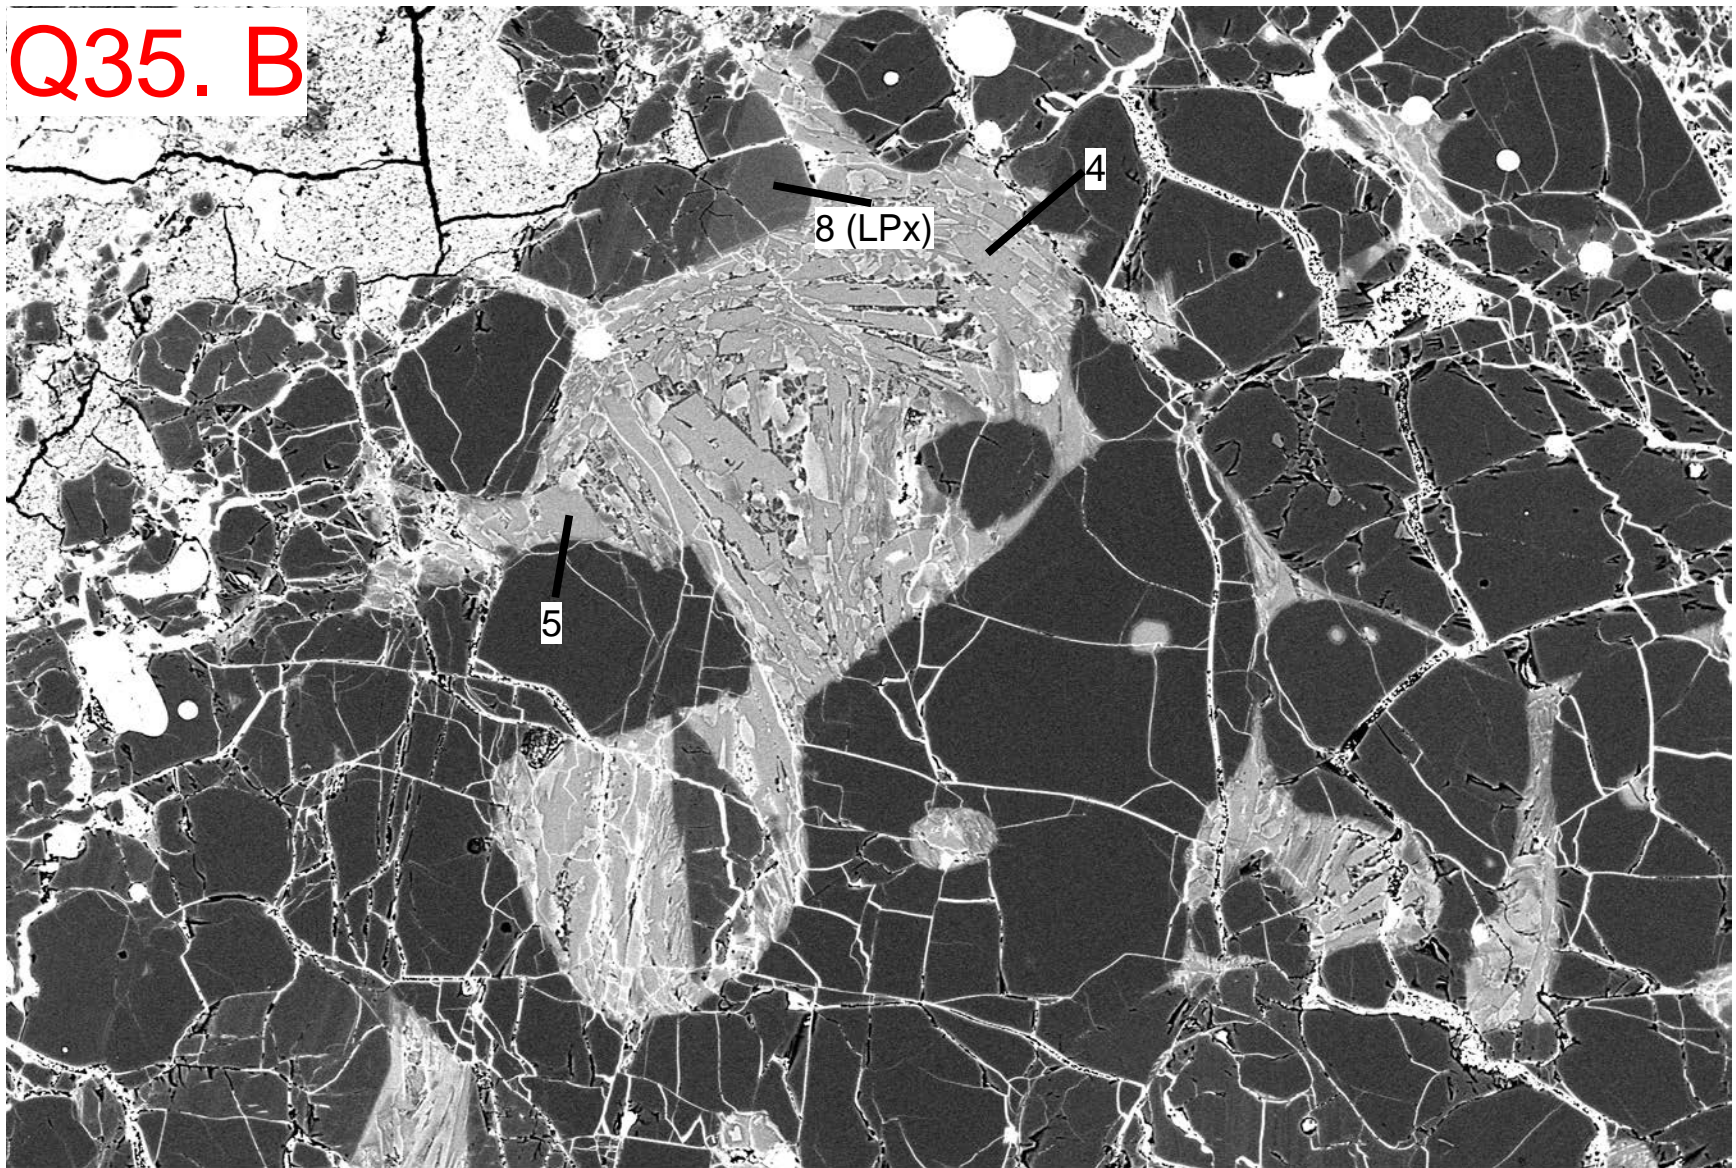



Q35. 1

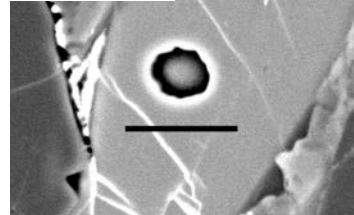

2

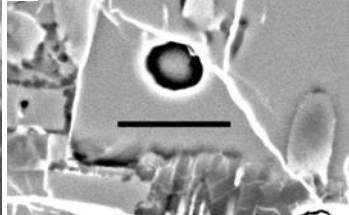

3

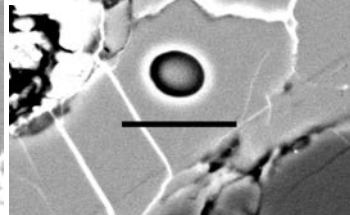

4

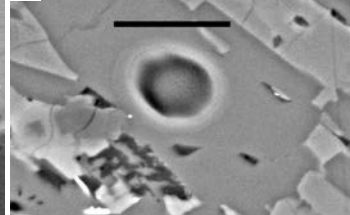

5

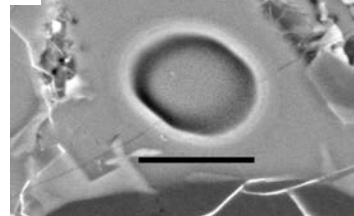

6 (OI)

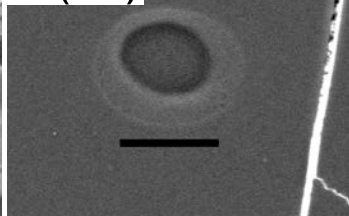

7 (OI)

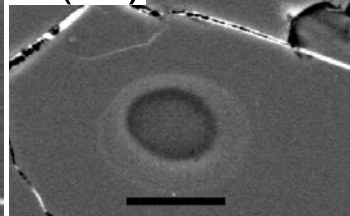

8 (LPx)

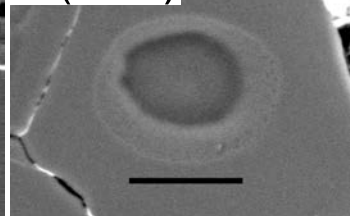

Q36

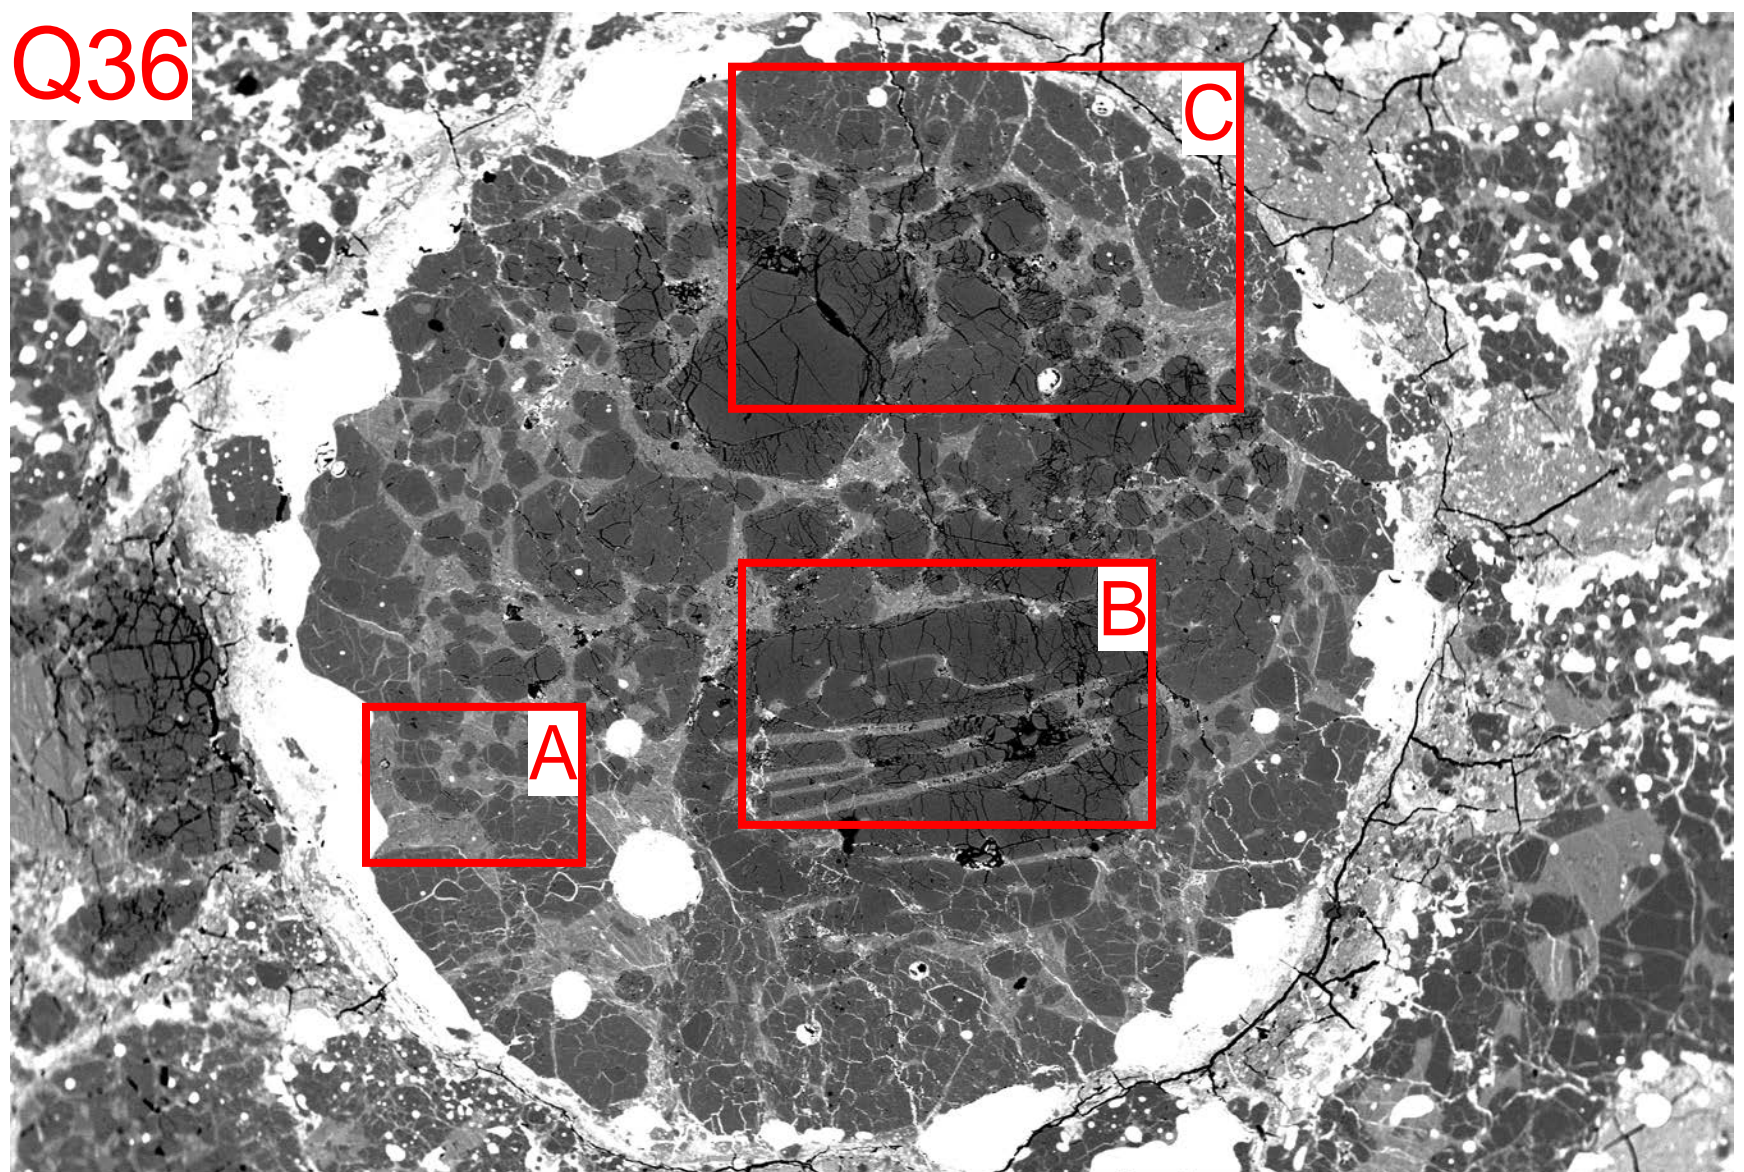

A

B

C



Q36. A

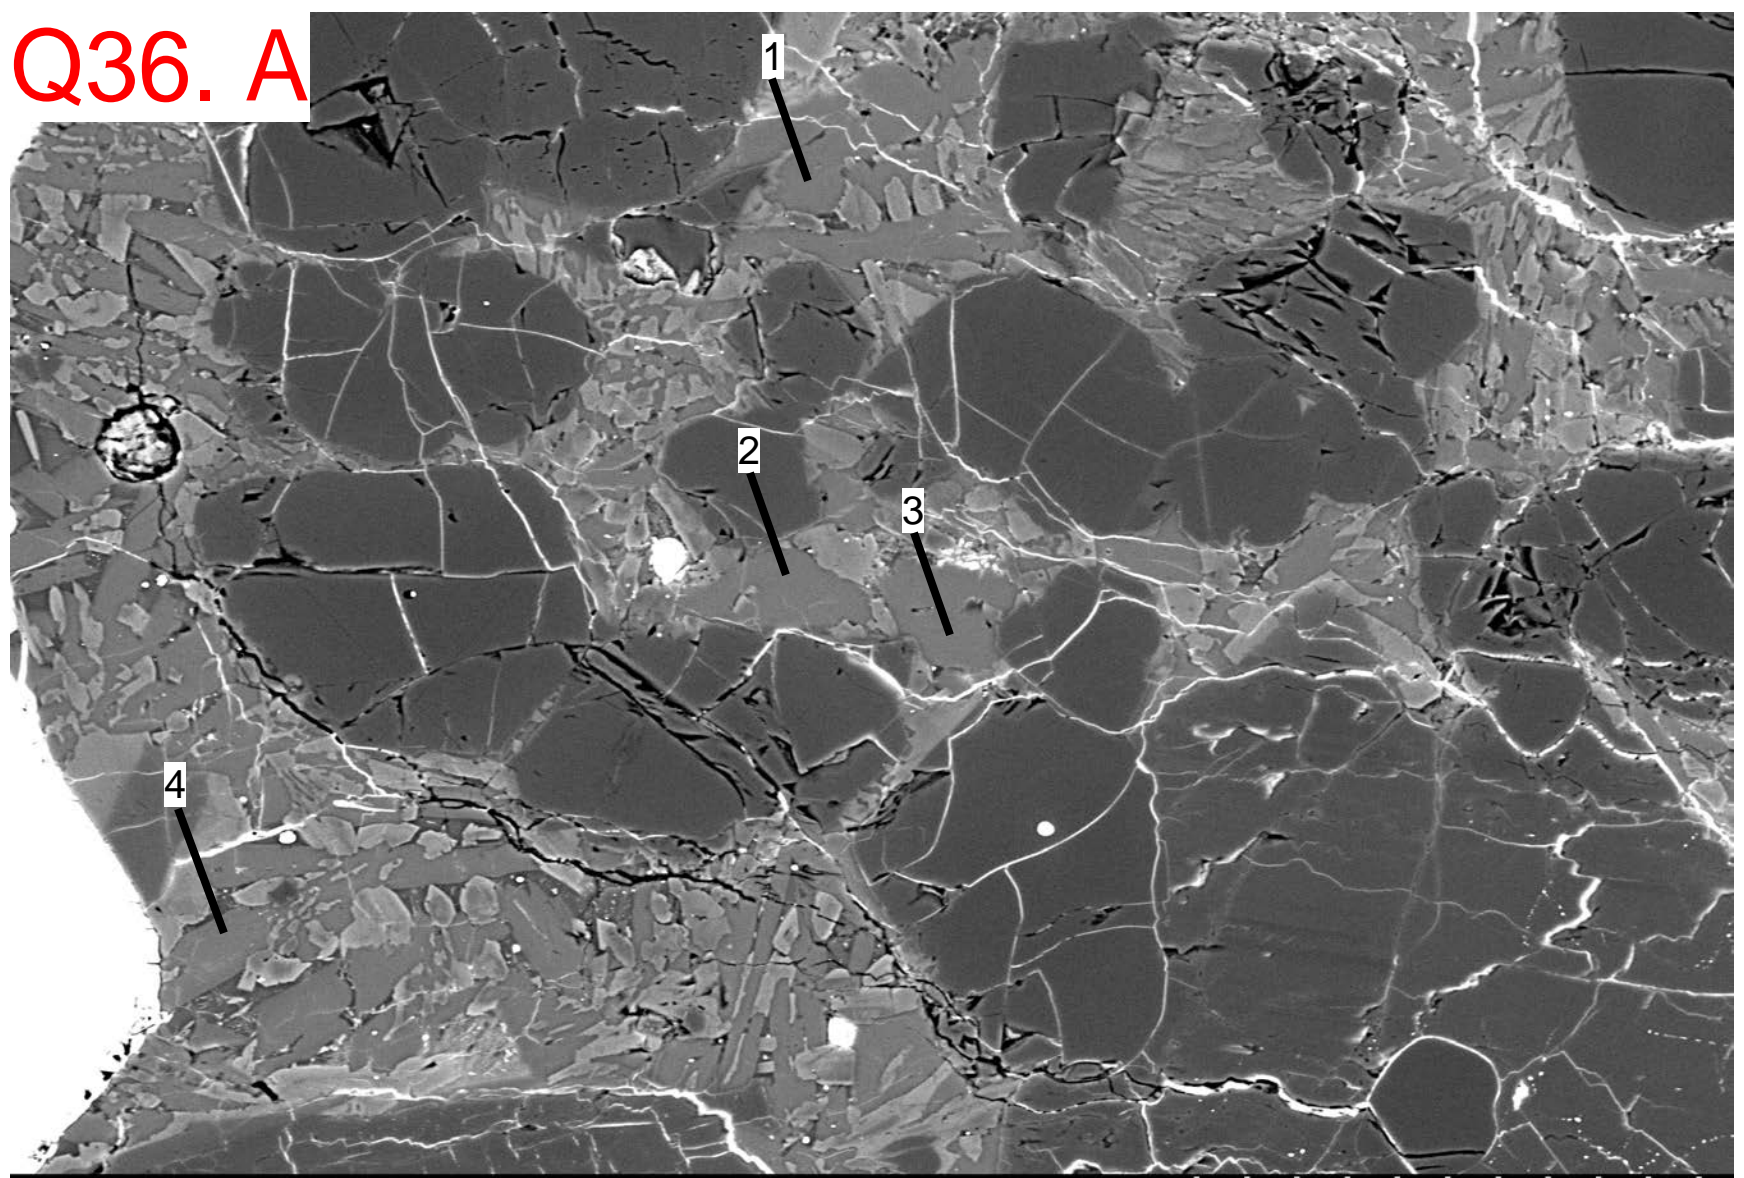



Q36. B

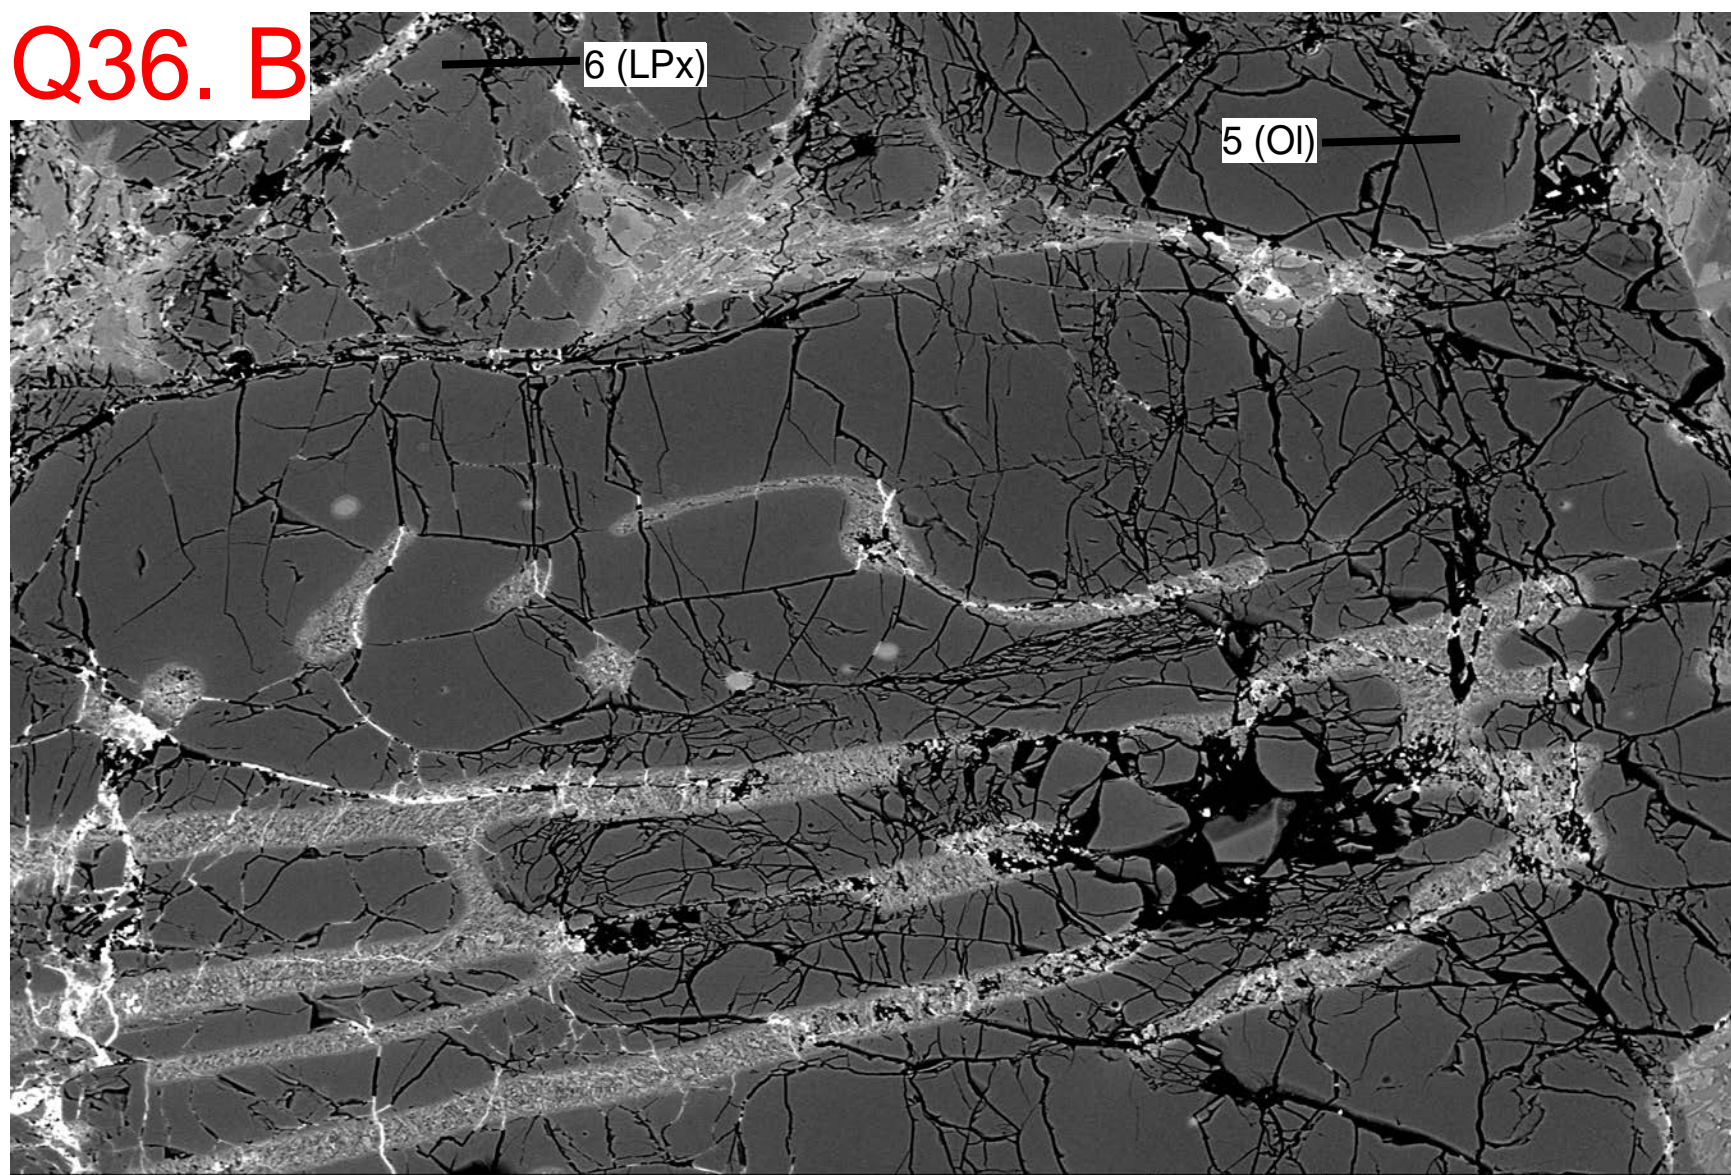

Q36 15.0kV x200 BSECOMP

200um



Q36. C

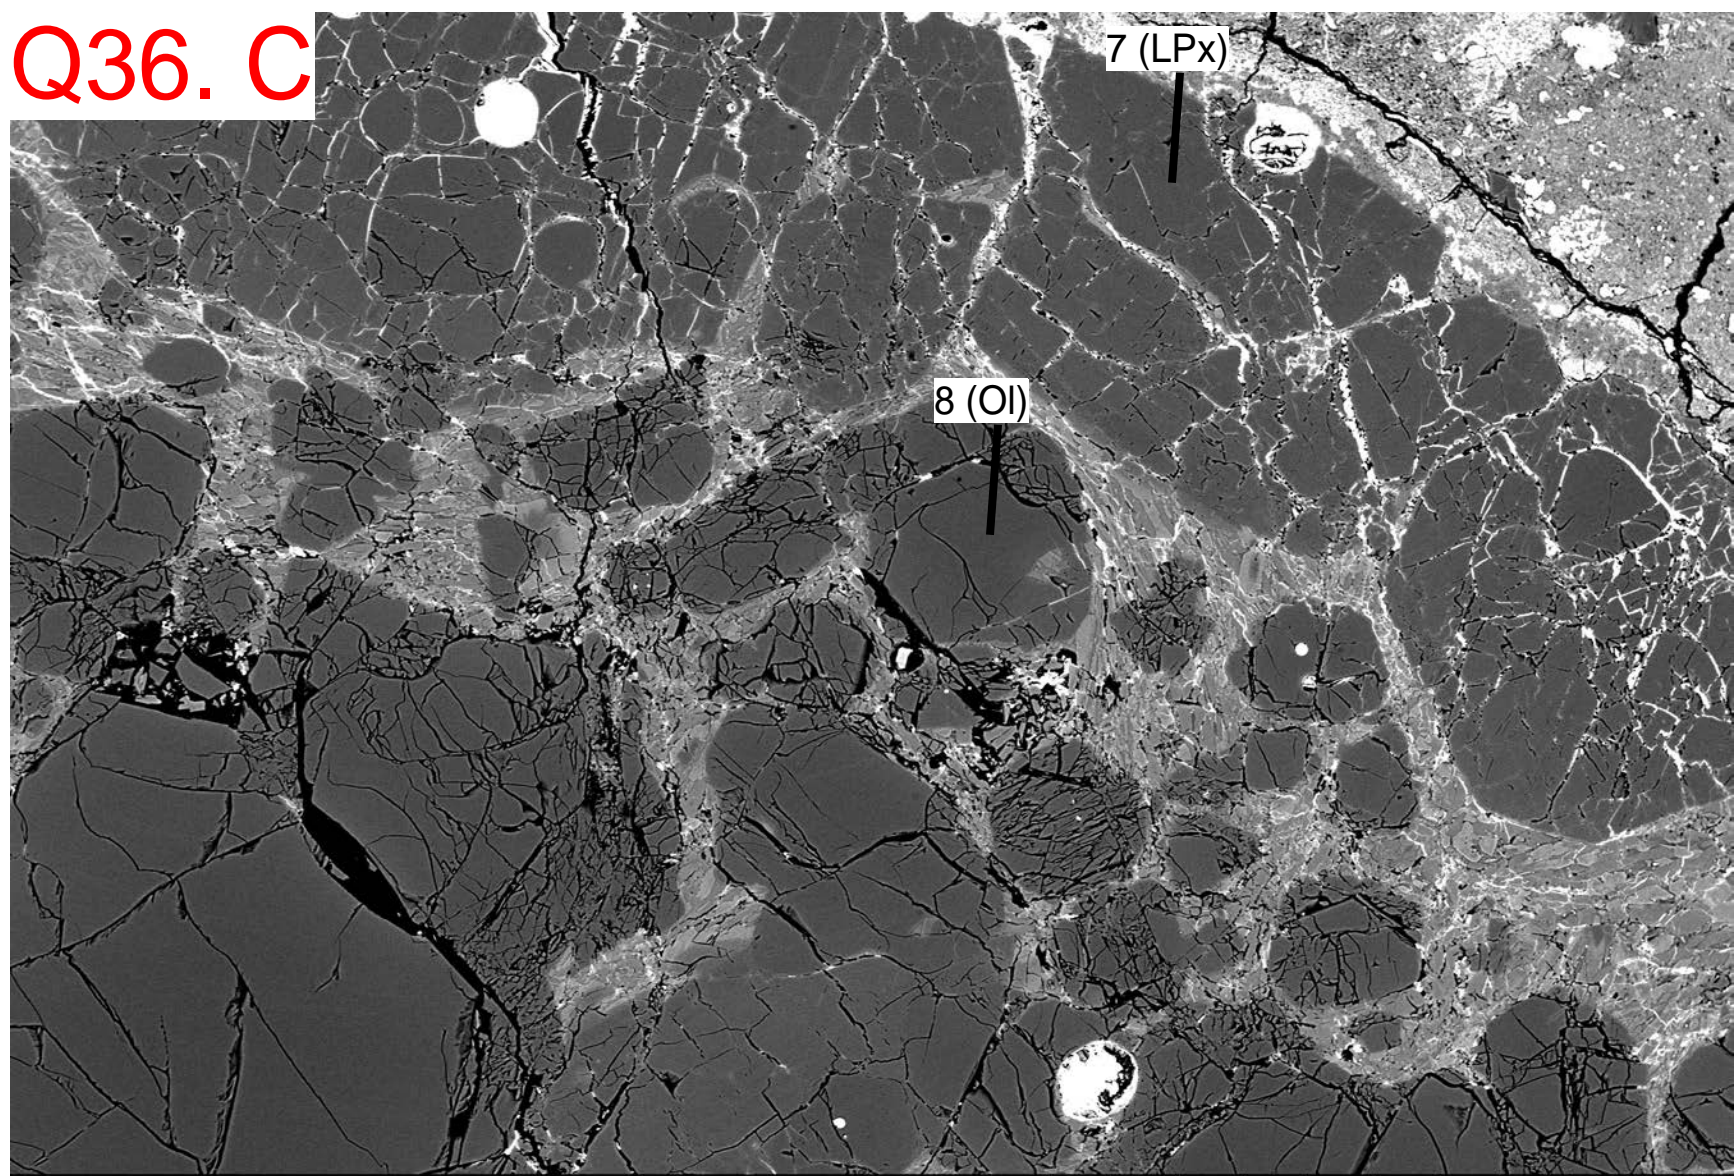

7 (LPx)

8 (OI)

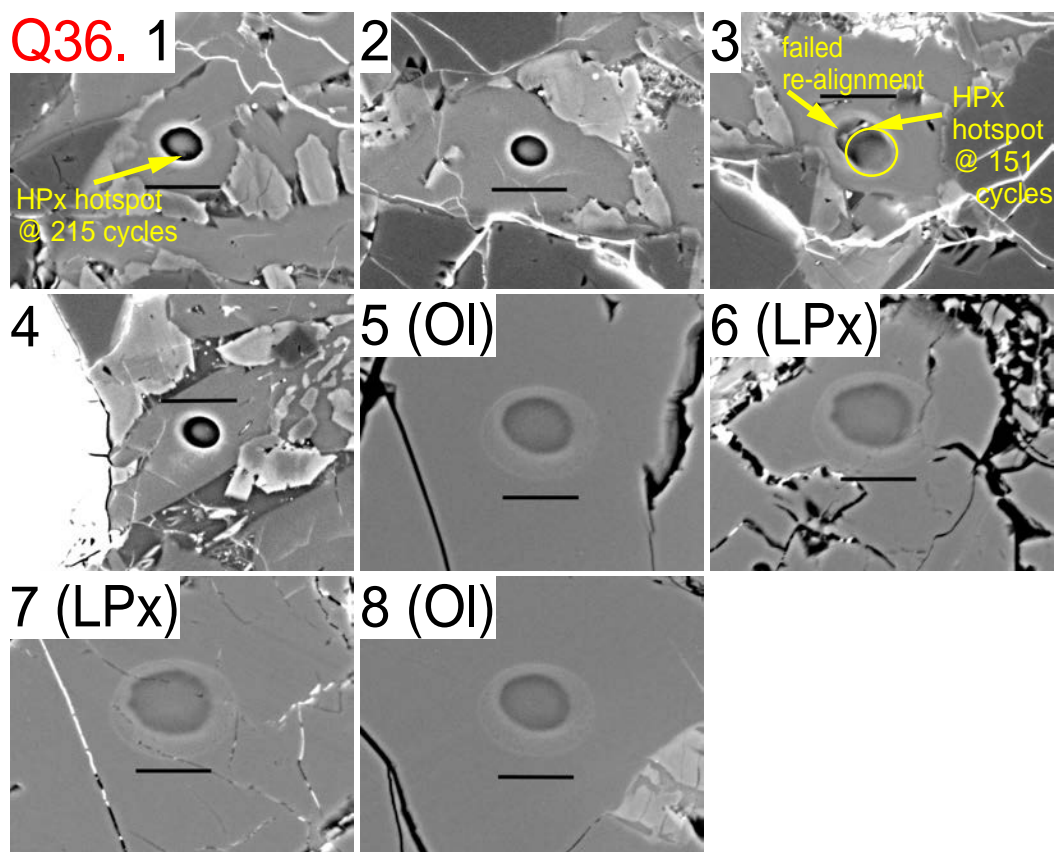



Q38

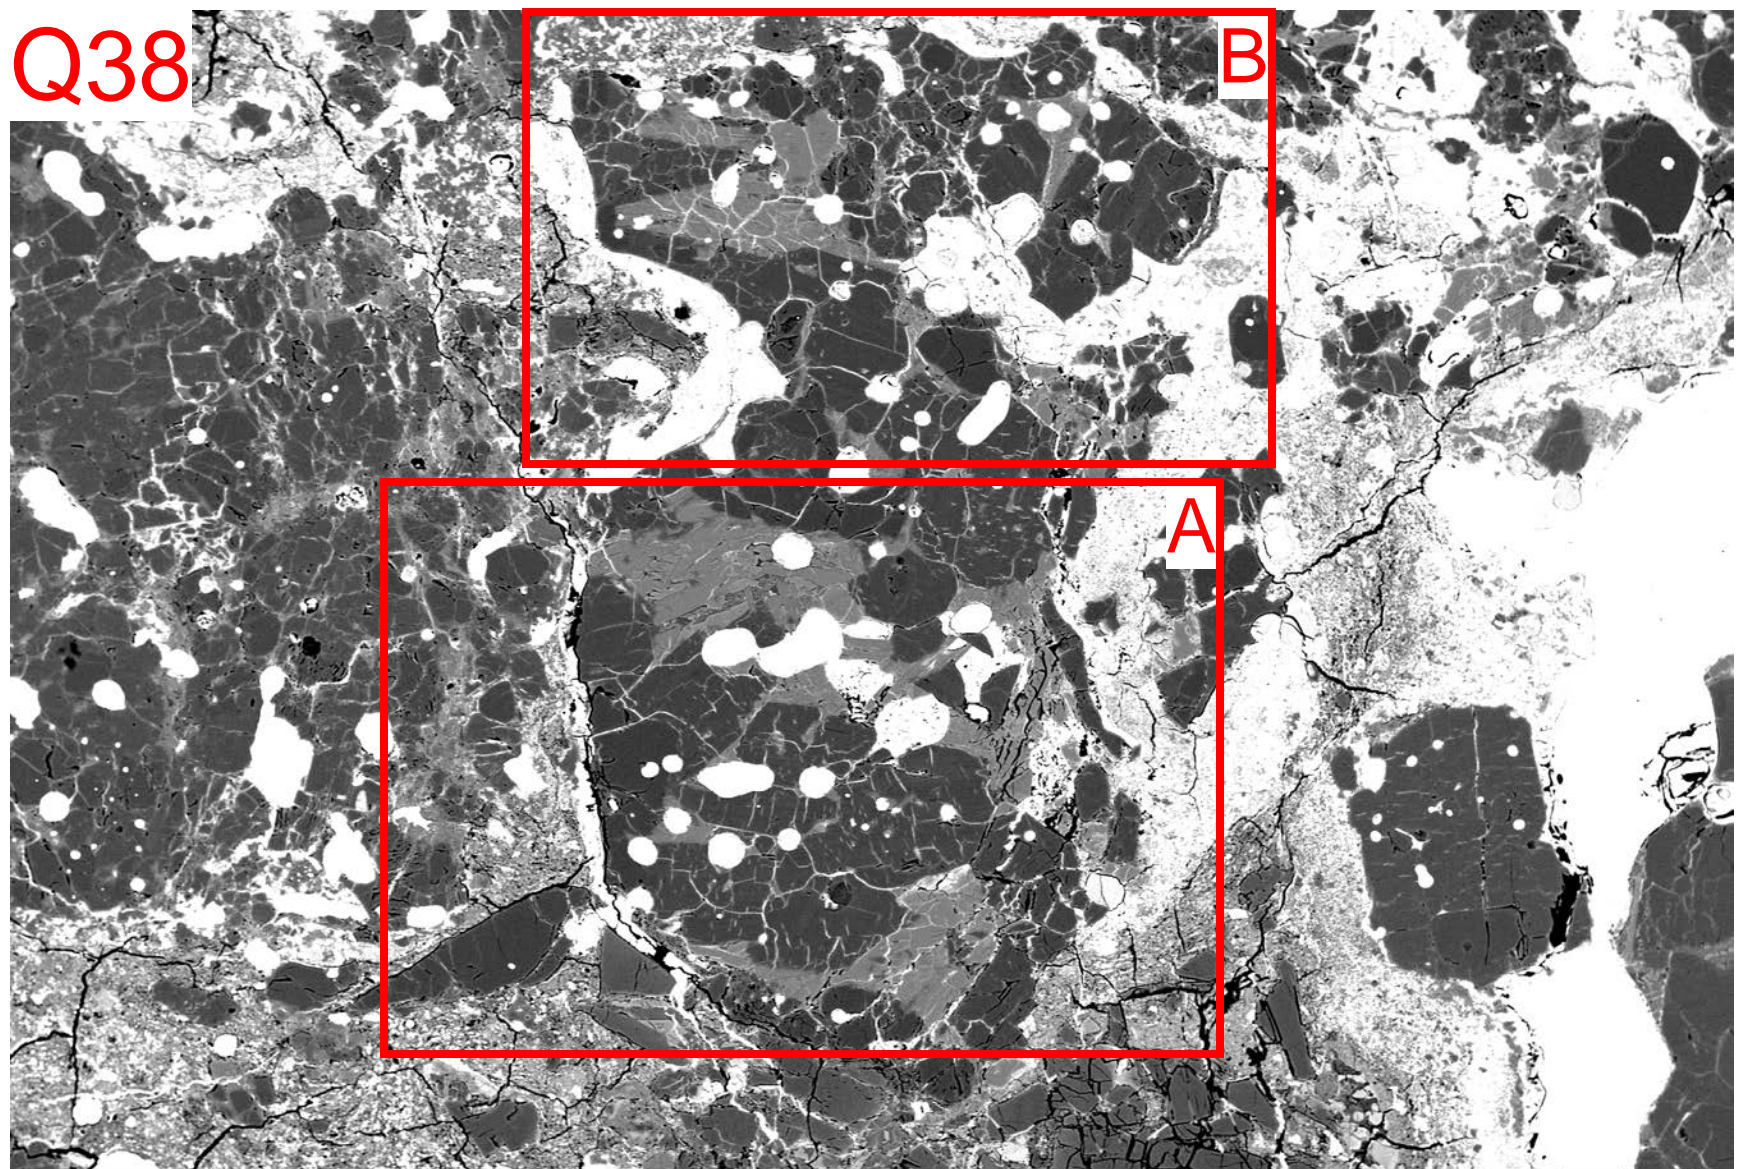

B

A

Q38 15.0kV x130 BSECOMP

400um



Q38. A

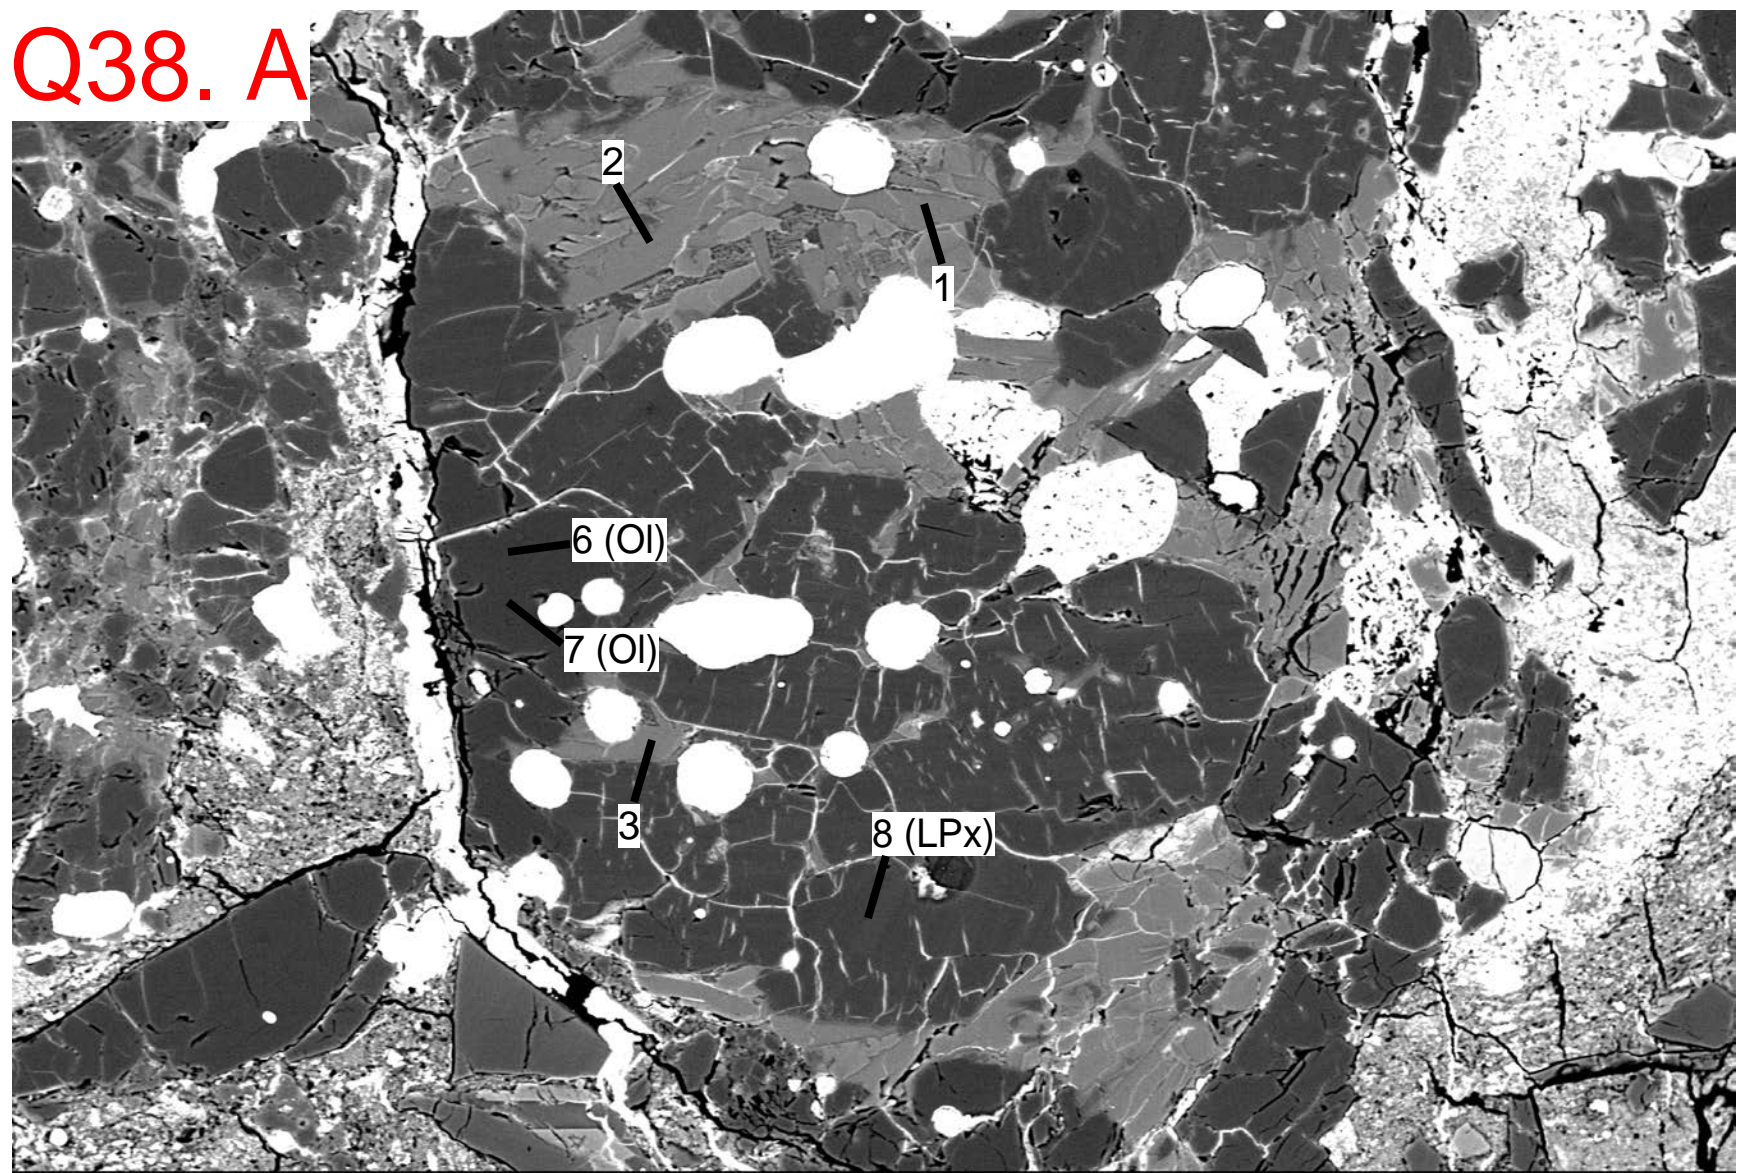

Q38 15.0kV x270 BSECOMP

200um



Q38. B

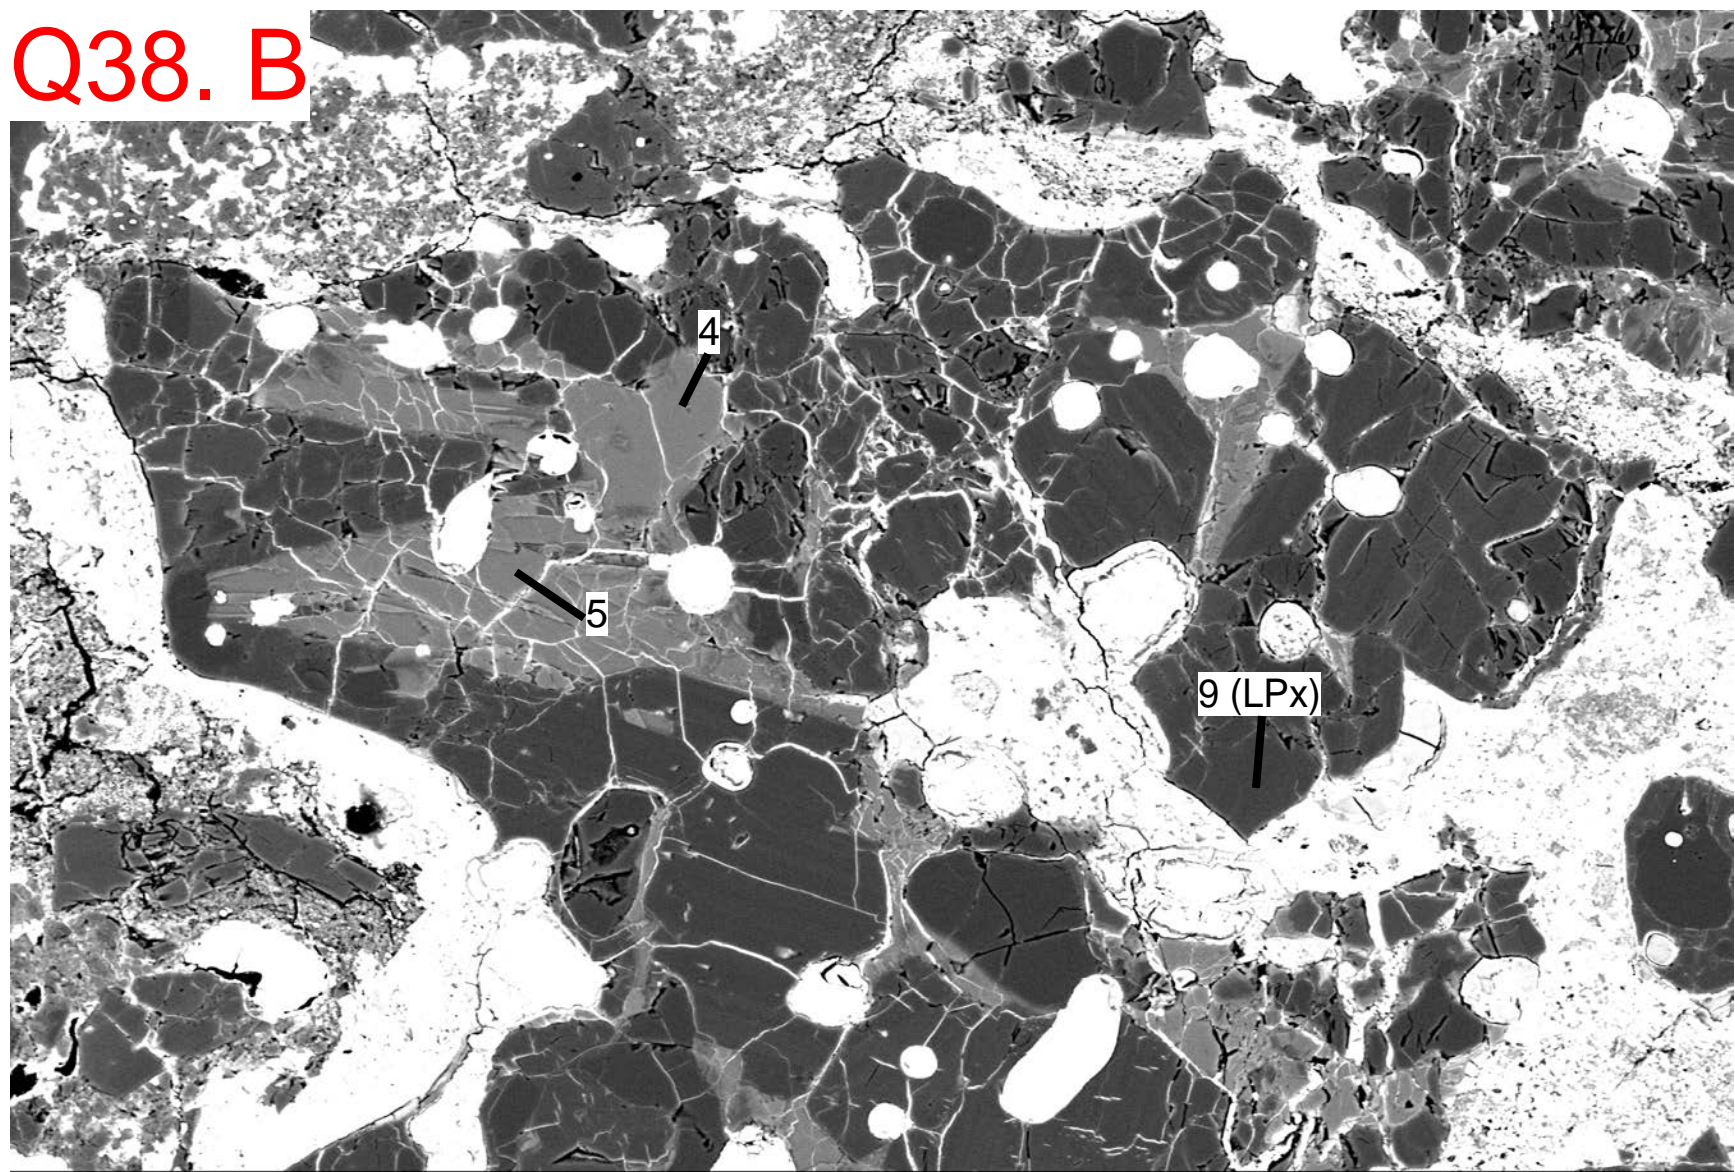

Q38 15.0kV x300 BSECOMP

100um

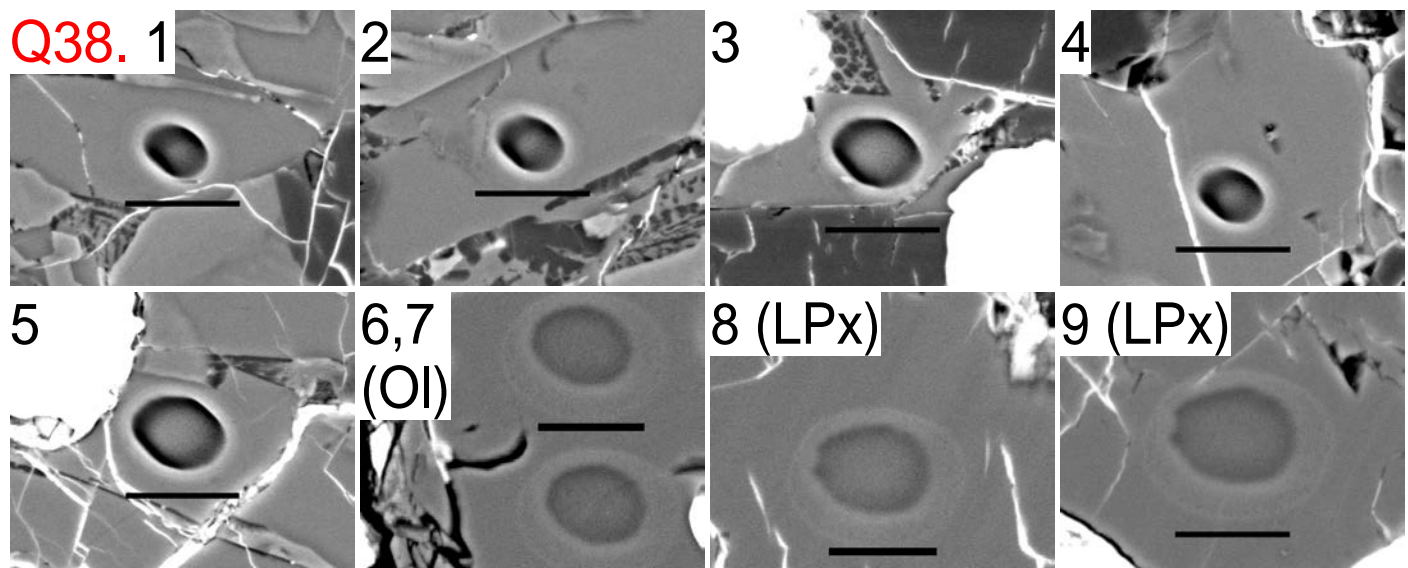



Q44

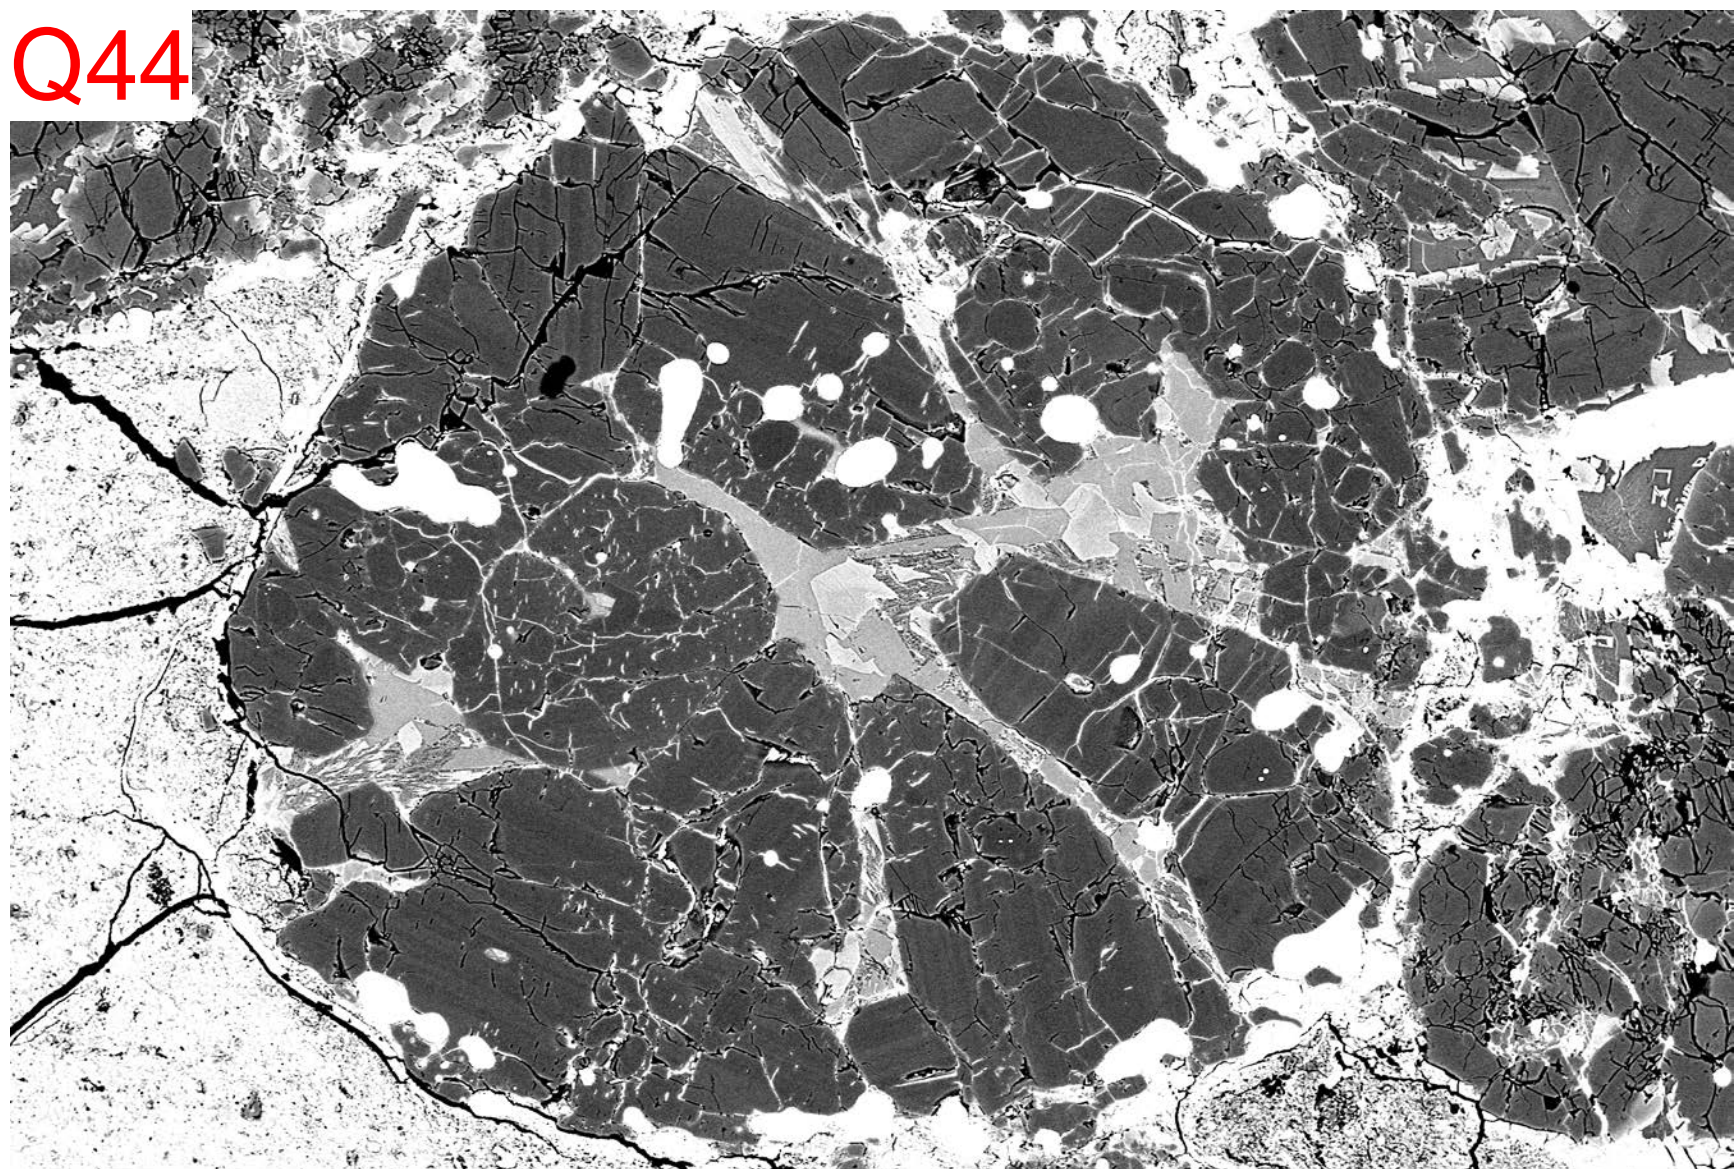

Q44 15.0kV x170 BSECOMP 300um



Q44

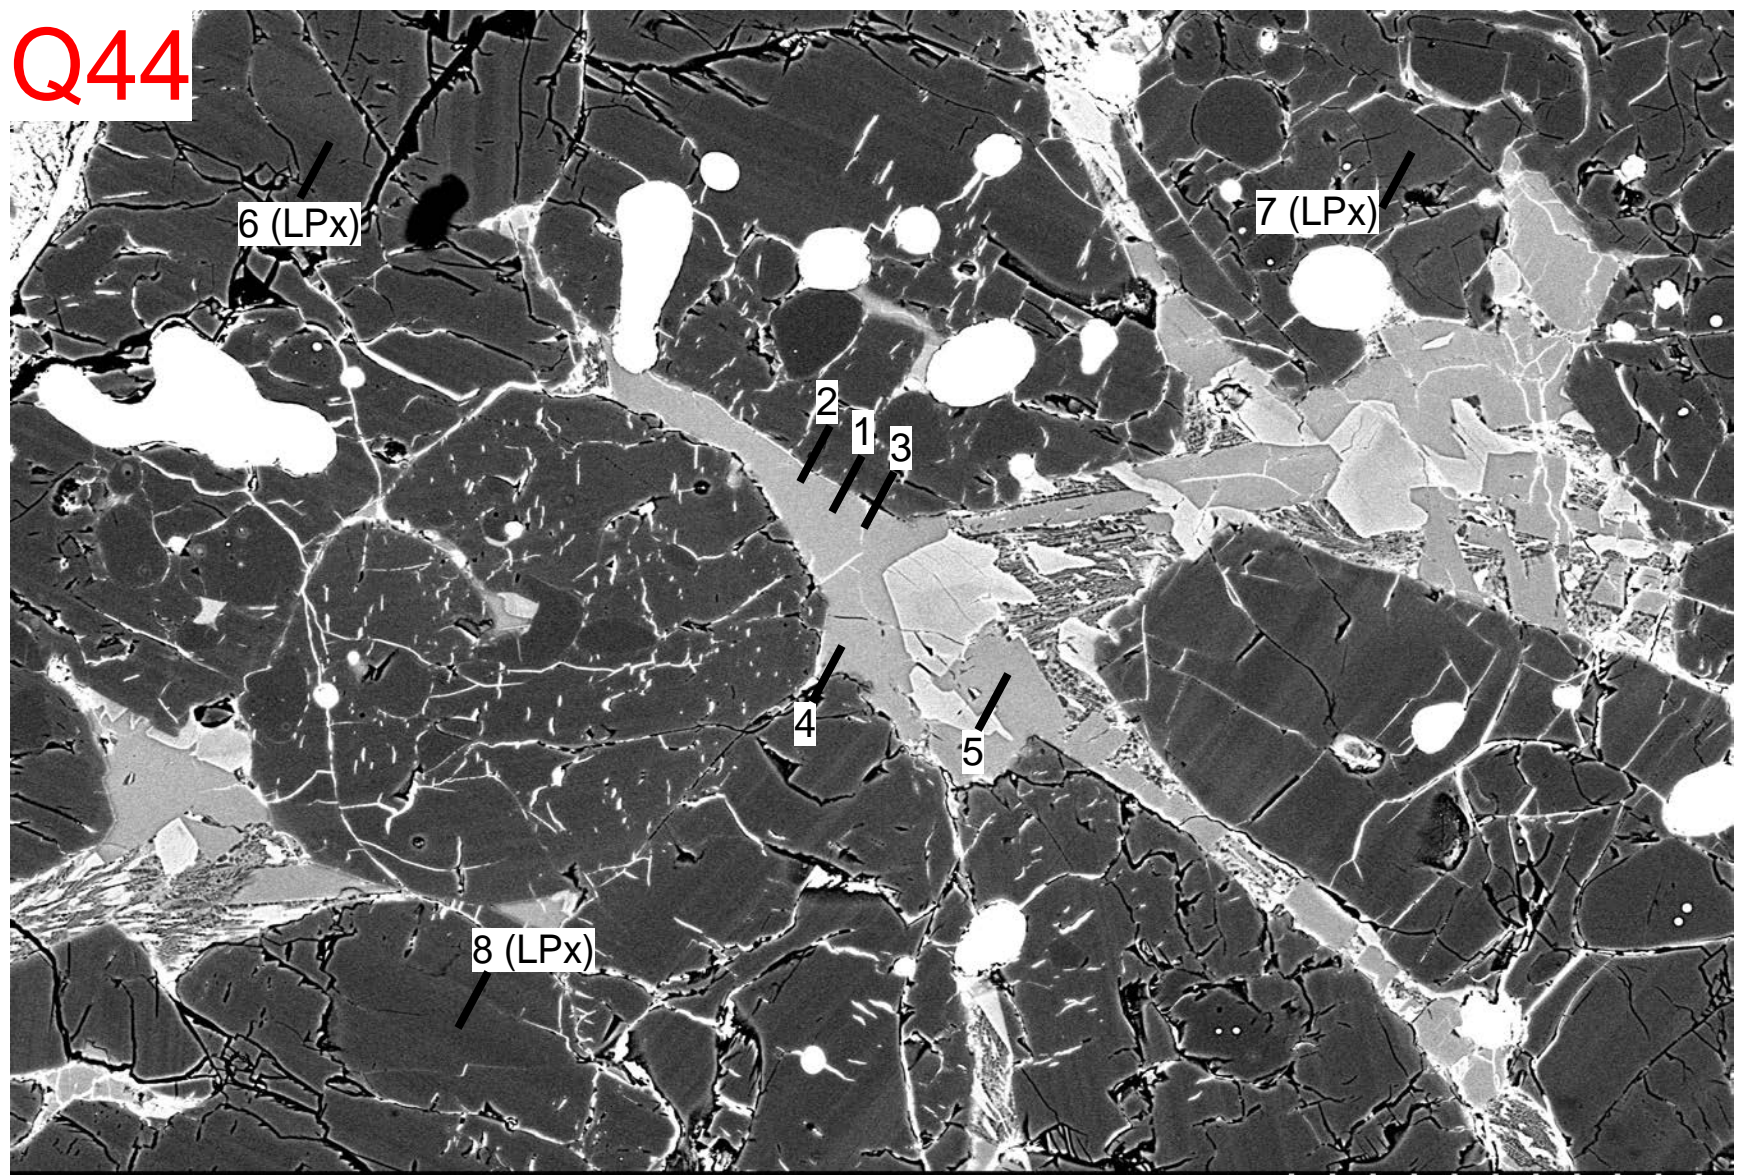

6 (LPx)

7 (LPx)

2

1

3

4

5

8 (LPx)



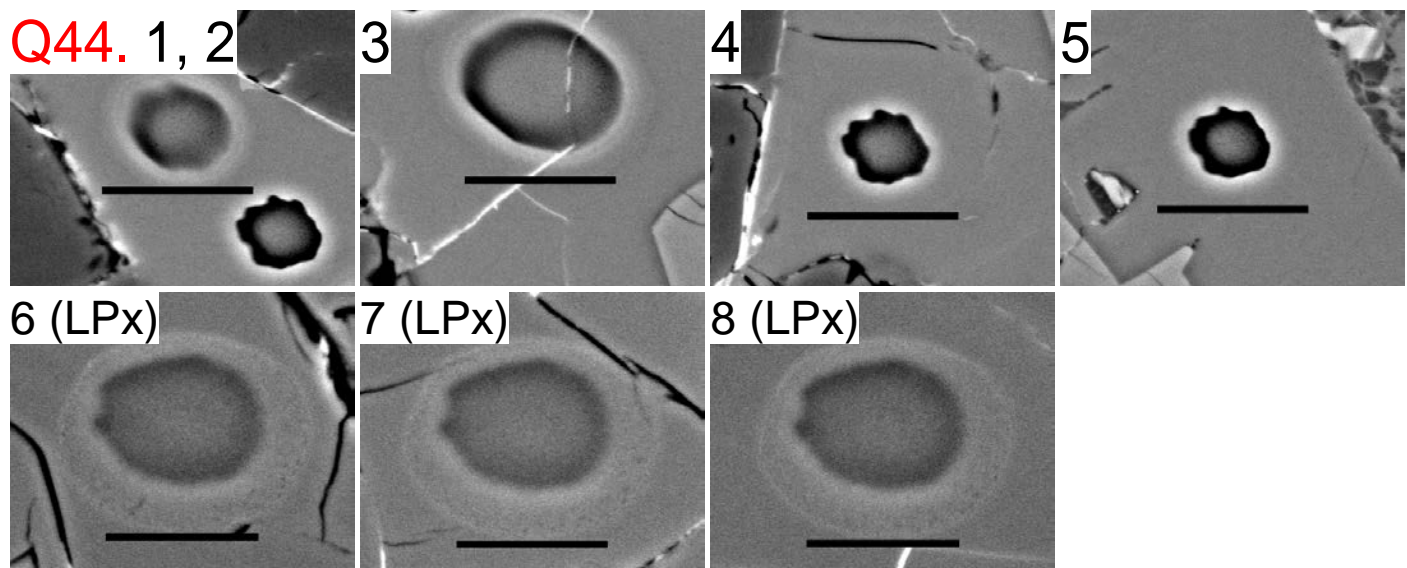

M3

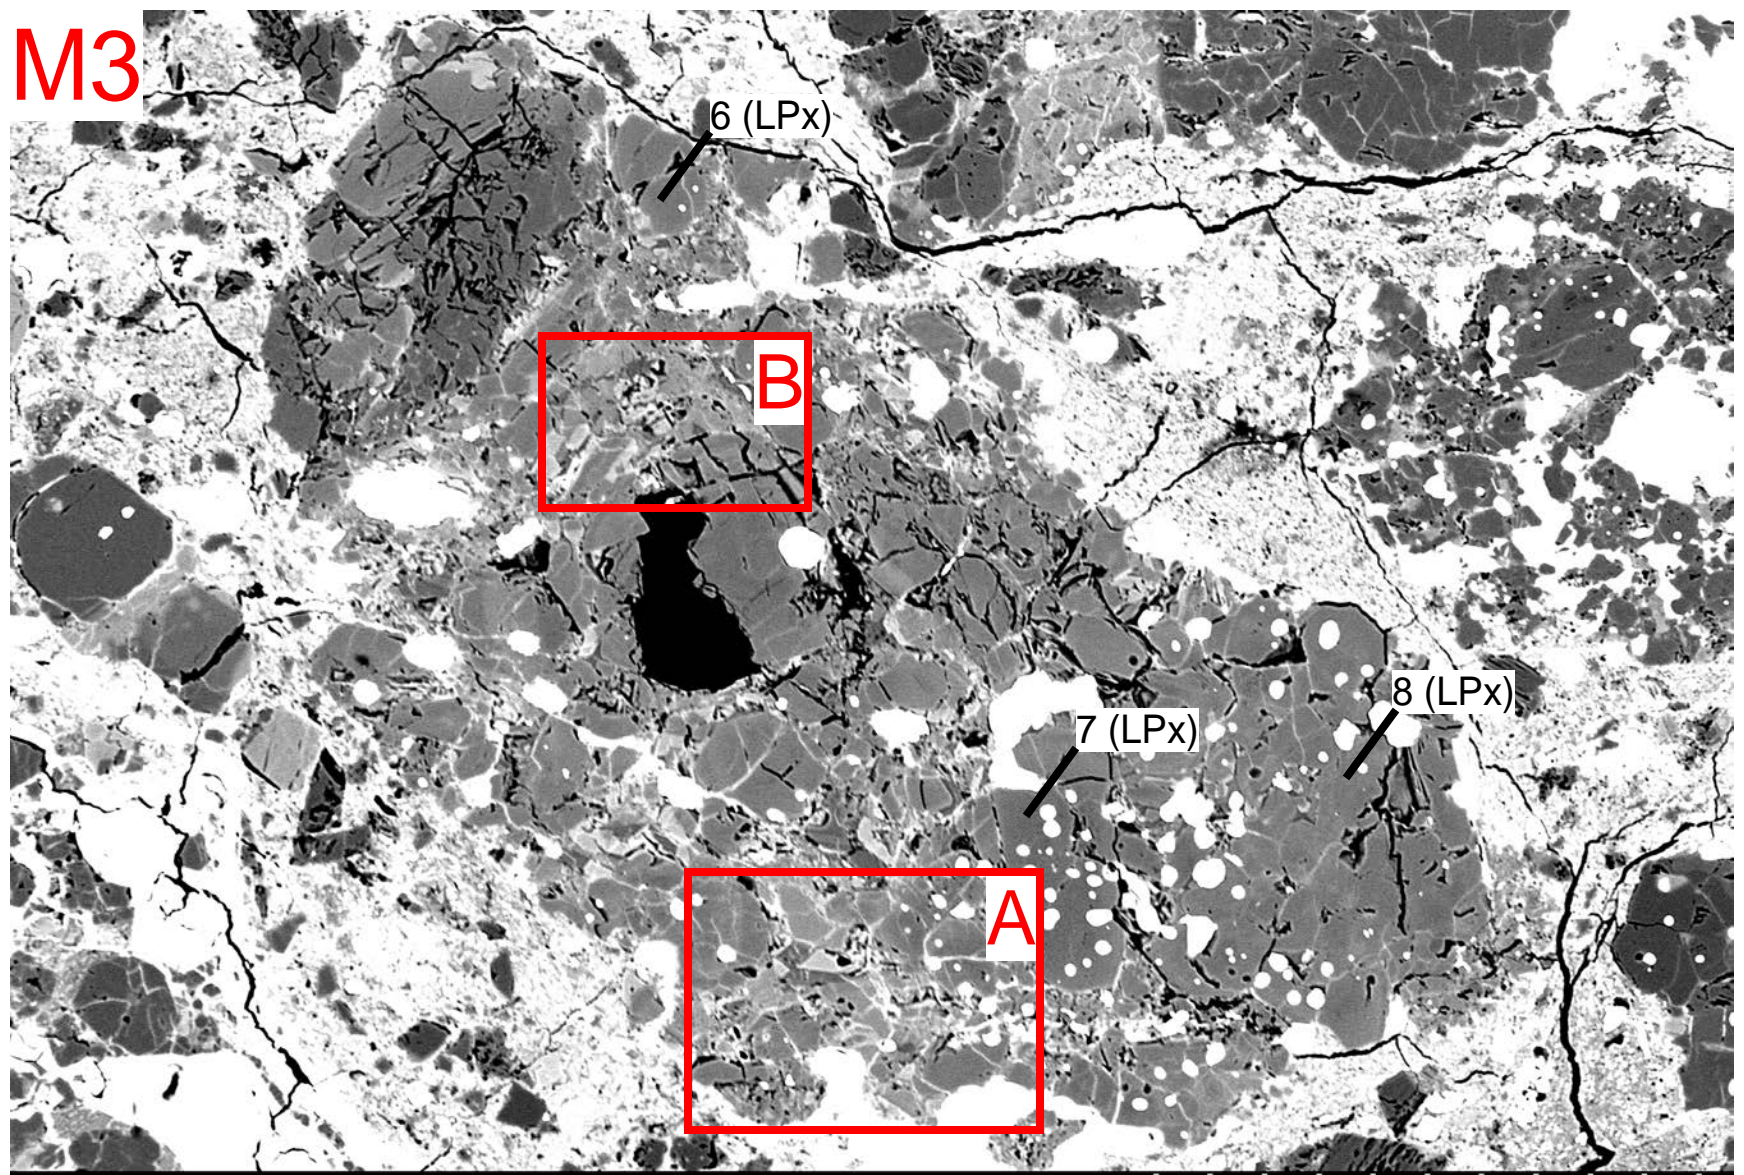

B

A

6 (LPx)

7 (LPx)

8 (LPx)



M3. A

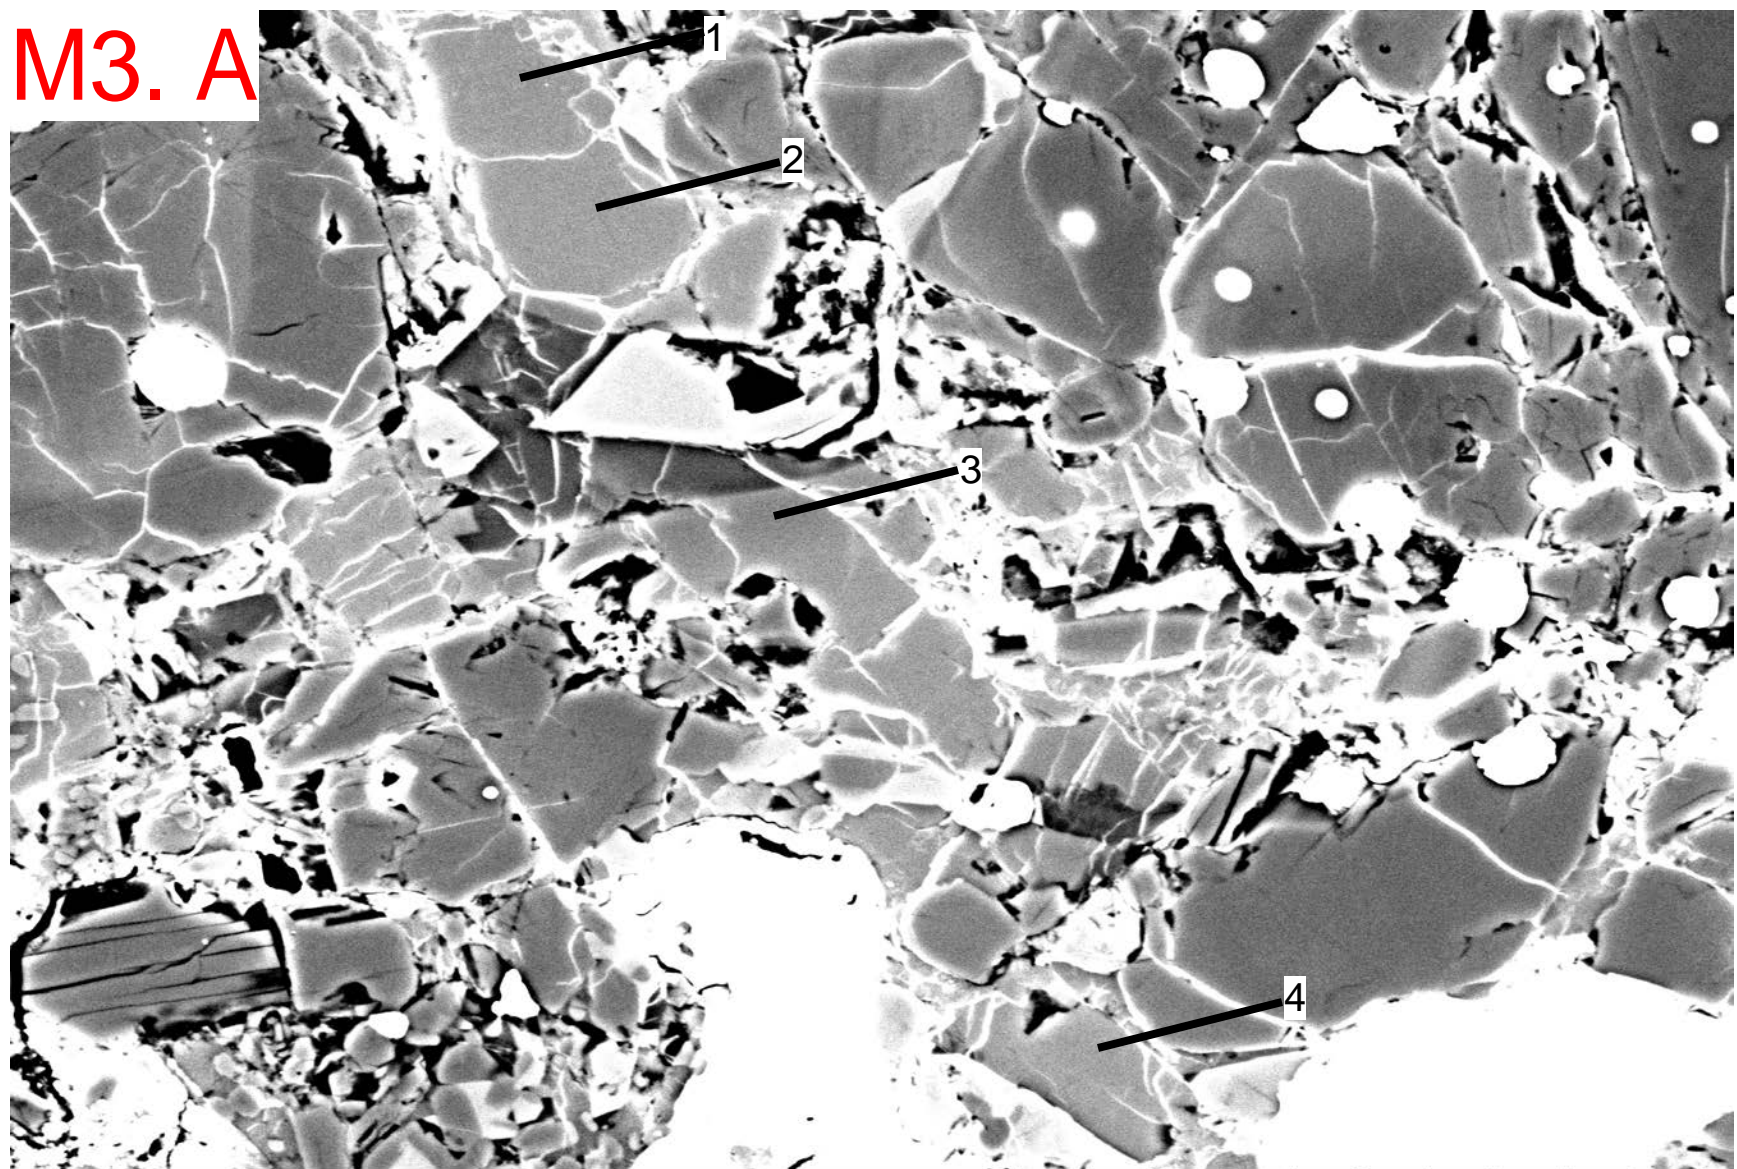

M3 15.0kV x1.00k BSECOMP

50.0um



M3. B

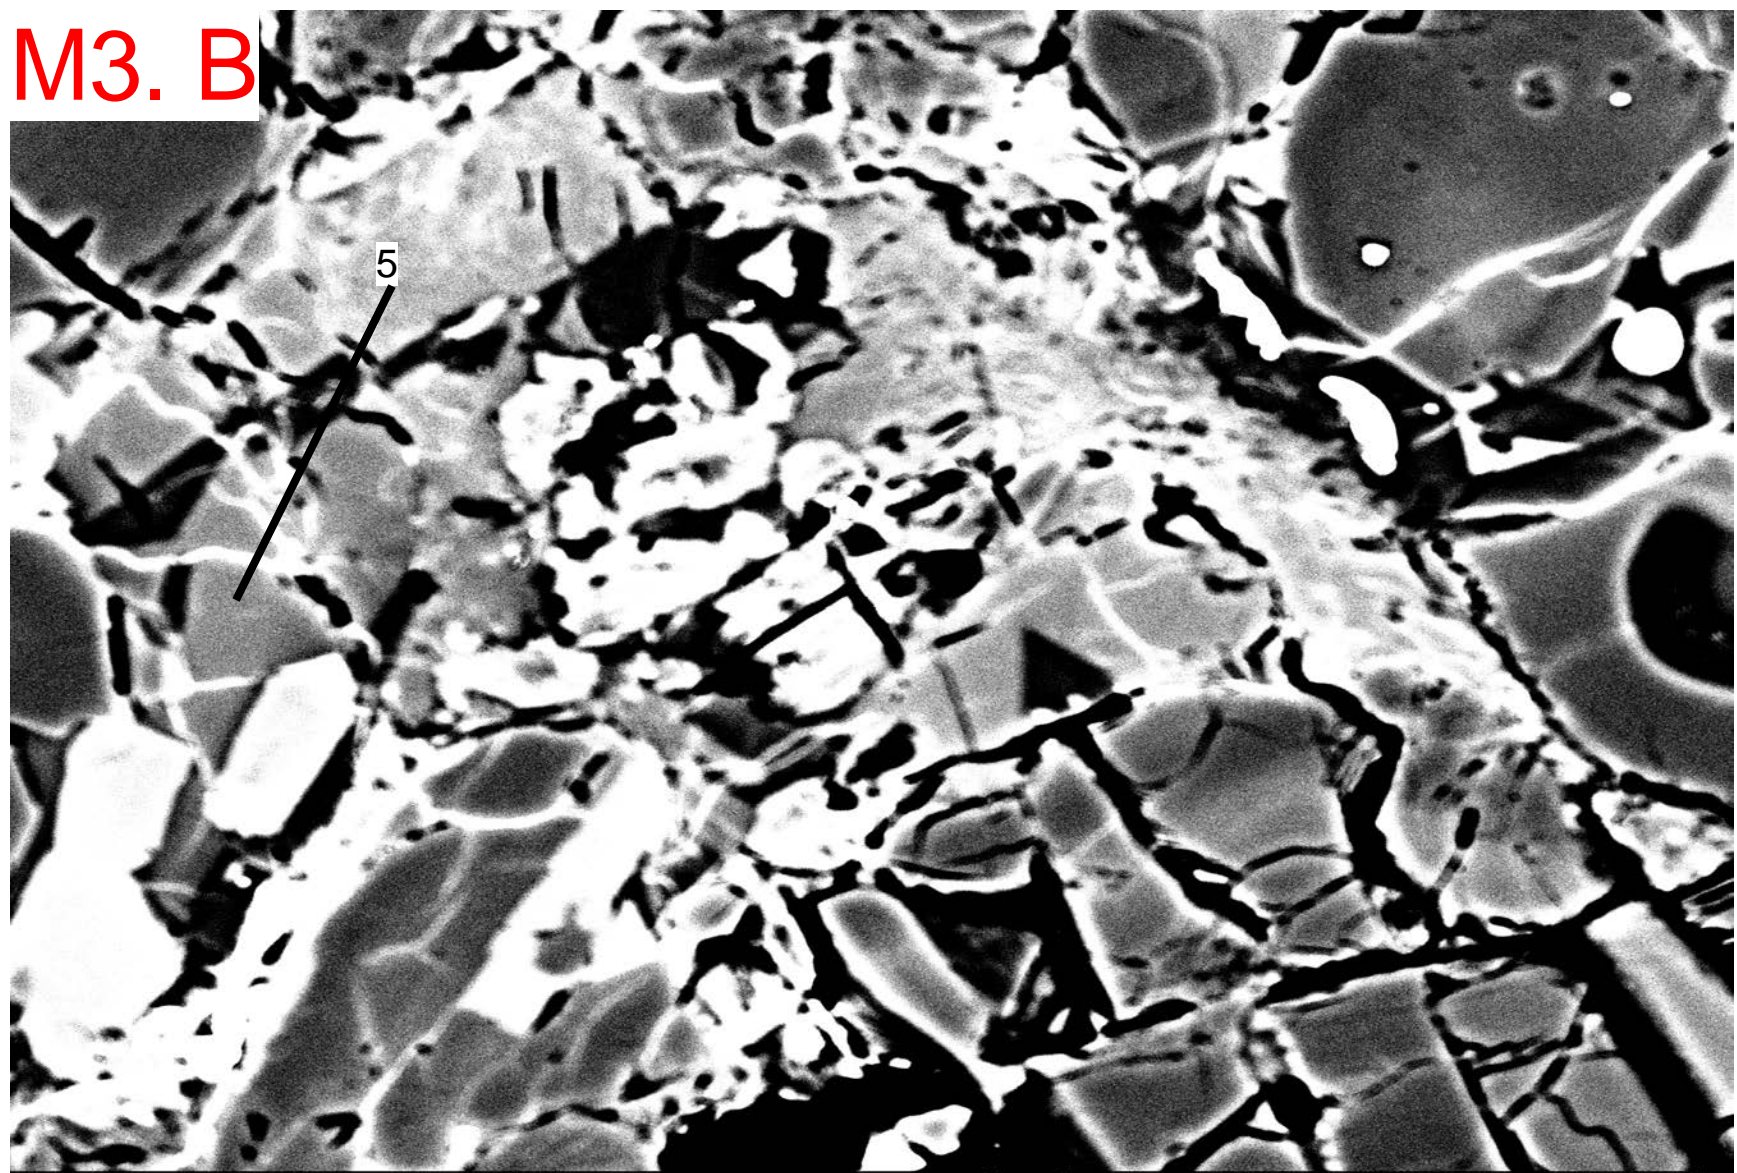

M3 15.0kV x1.30k BSECOMP

40.0um



**M3.**

1,2

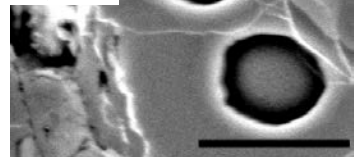

3

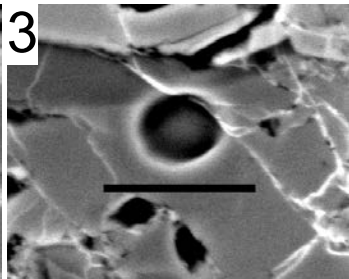

4

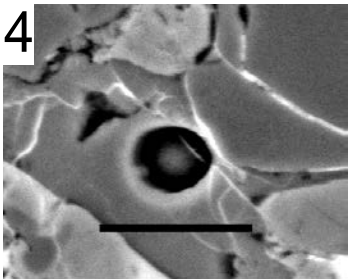

5

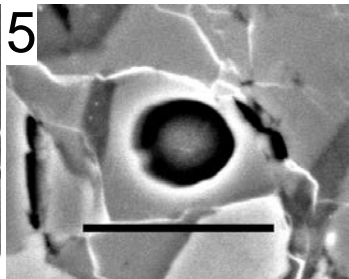

6 (LPx)

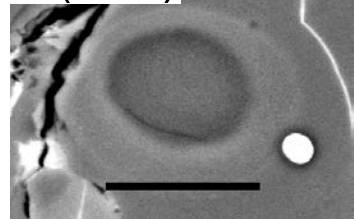

7 (LPx)

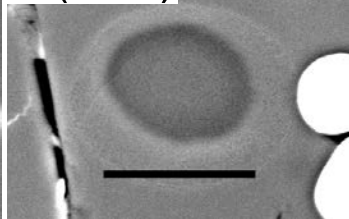

8 (LPx)

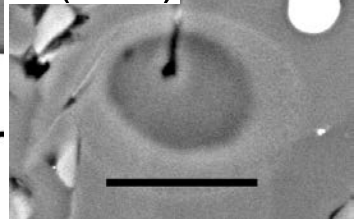

M6

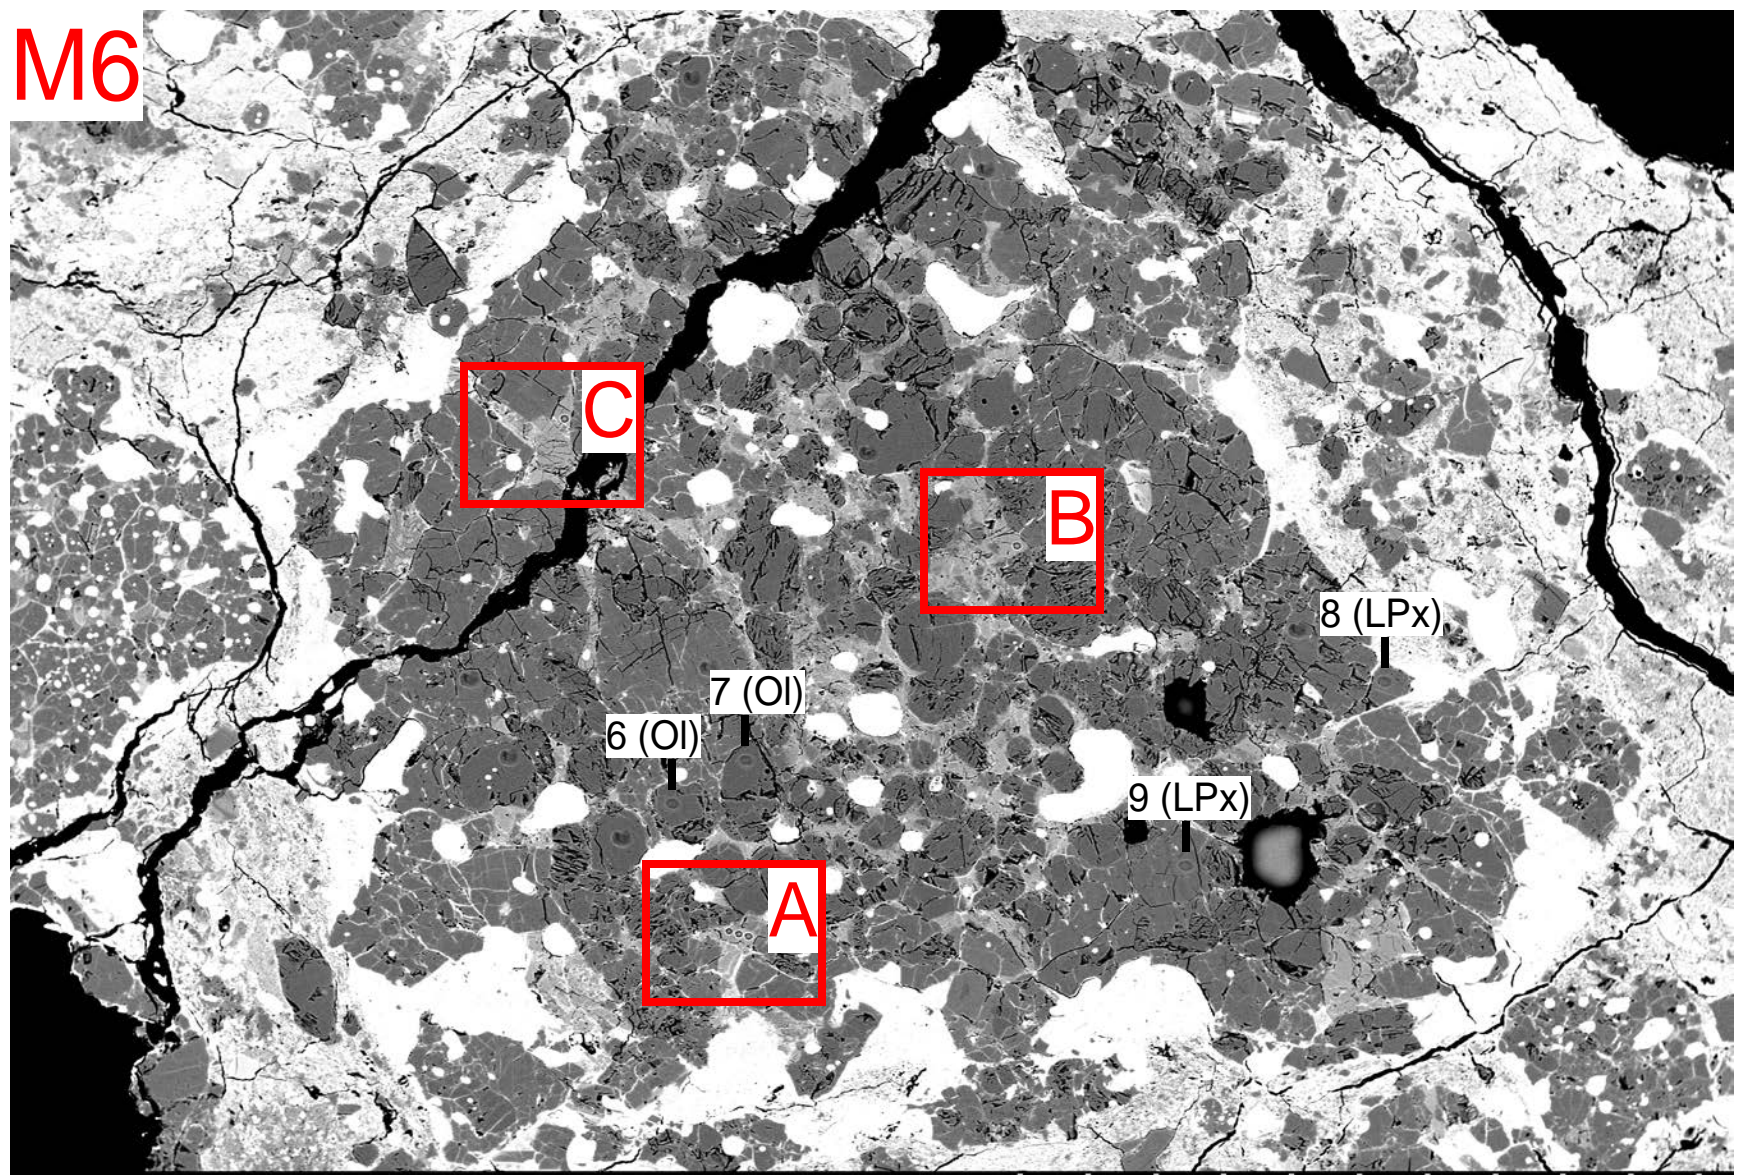

C

B

A

6 (OI)

7 (OI)

8 (LPx)

9 (LPx)

M6 15.0kV x100 BSECOMP

500um



M6. A

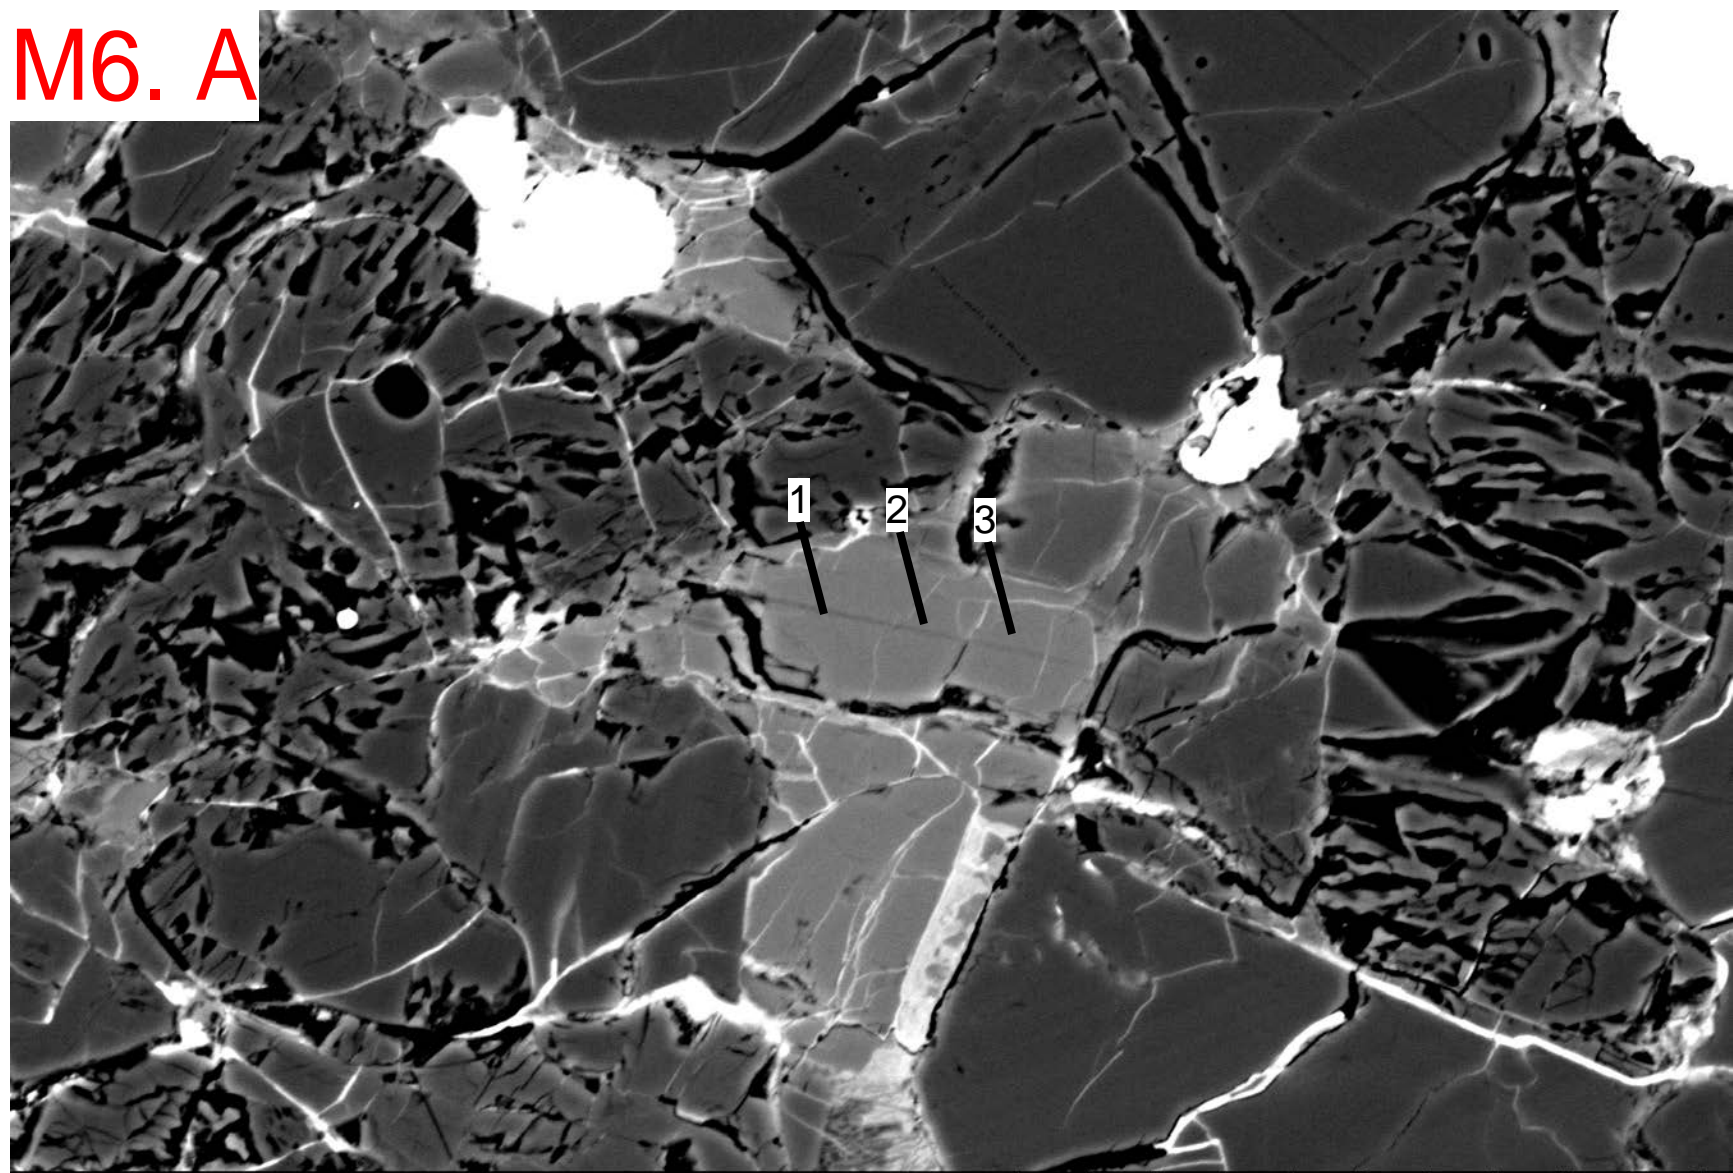

M6 15.0kV x1.00k BSECOMP

50.0um

M6. B

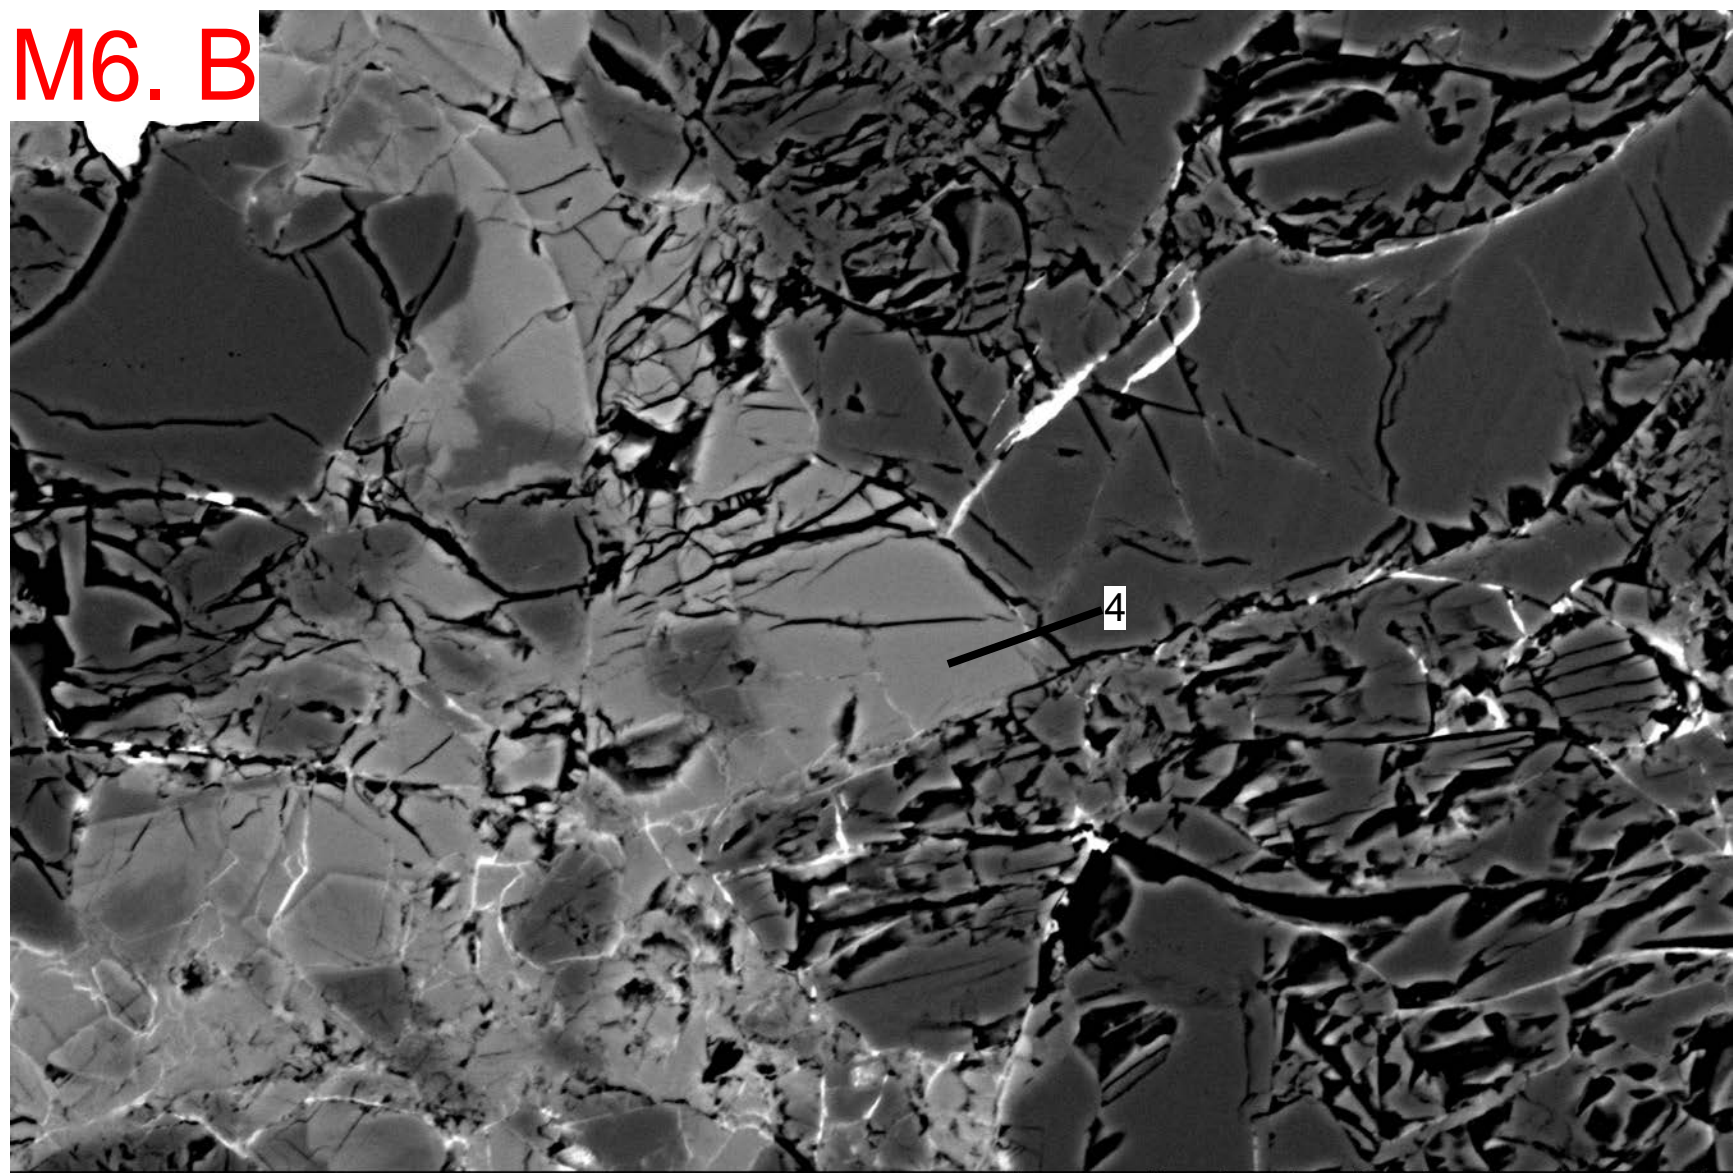

M6 15.0kV x1.00k BSECOMP

50.0um



M6. C

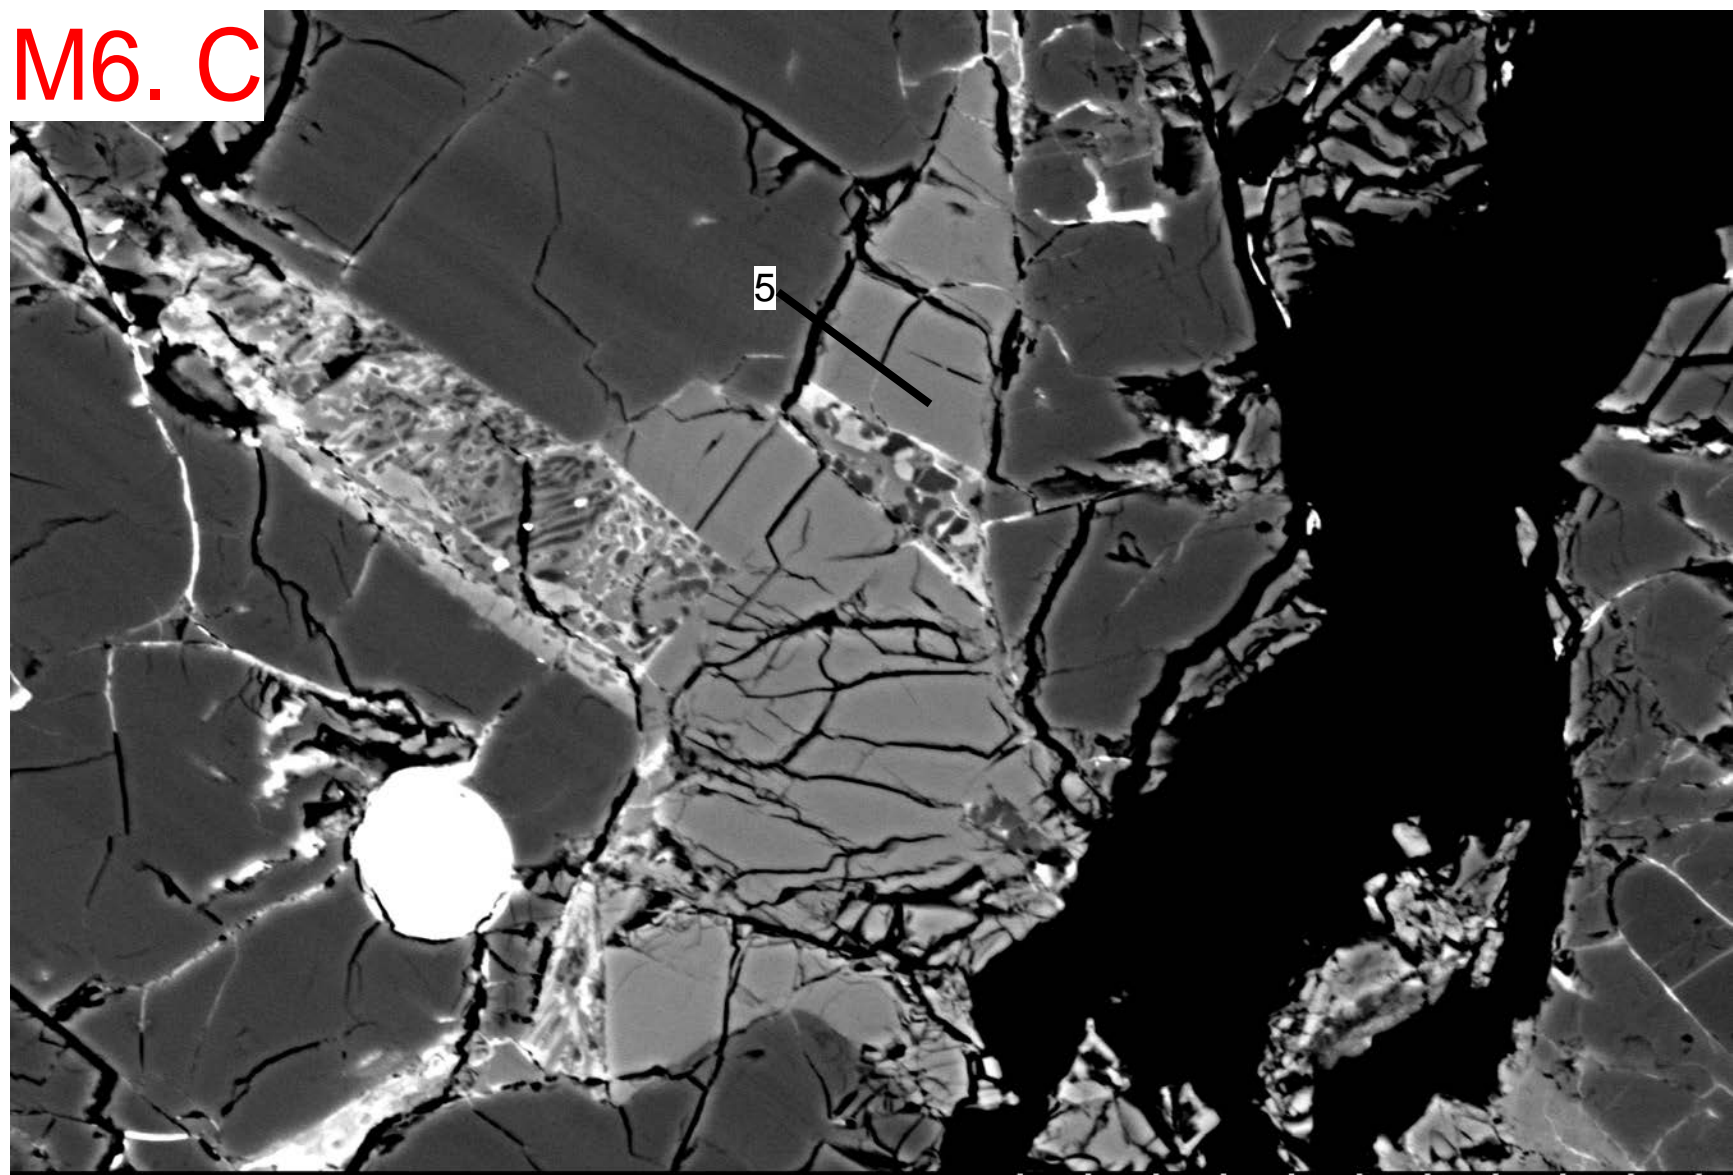

M6 15.0kV x1.00k BSECOMP

50.0um

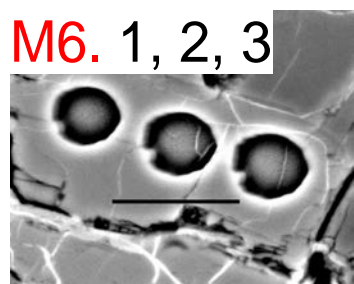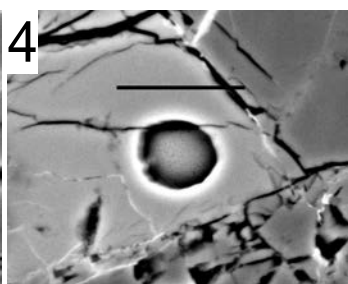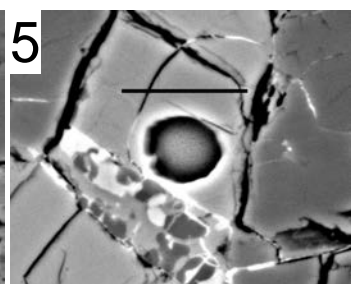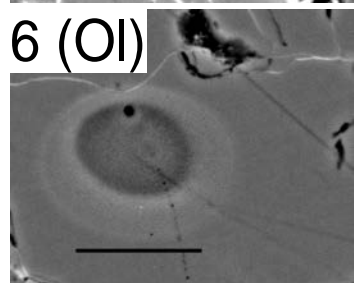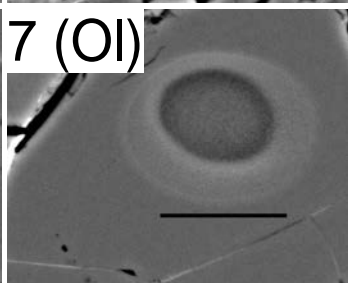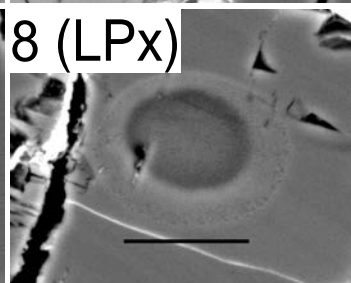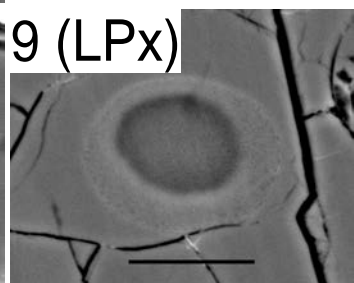



M23

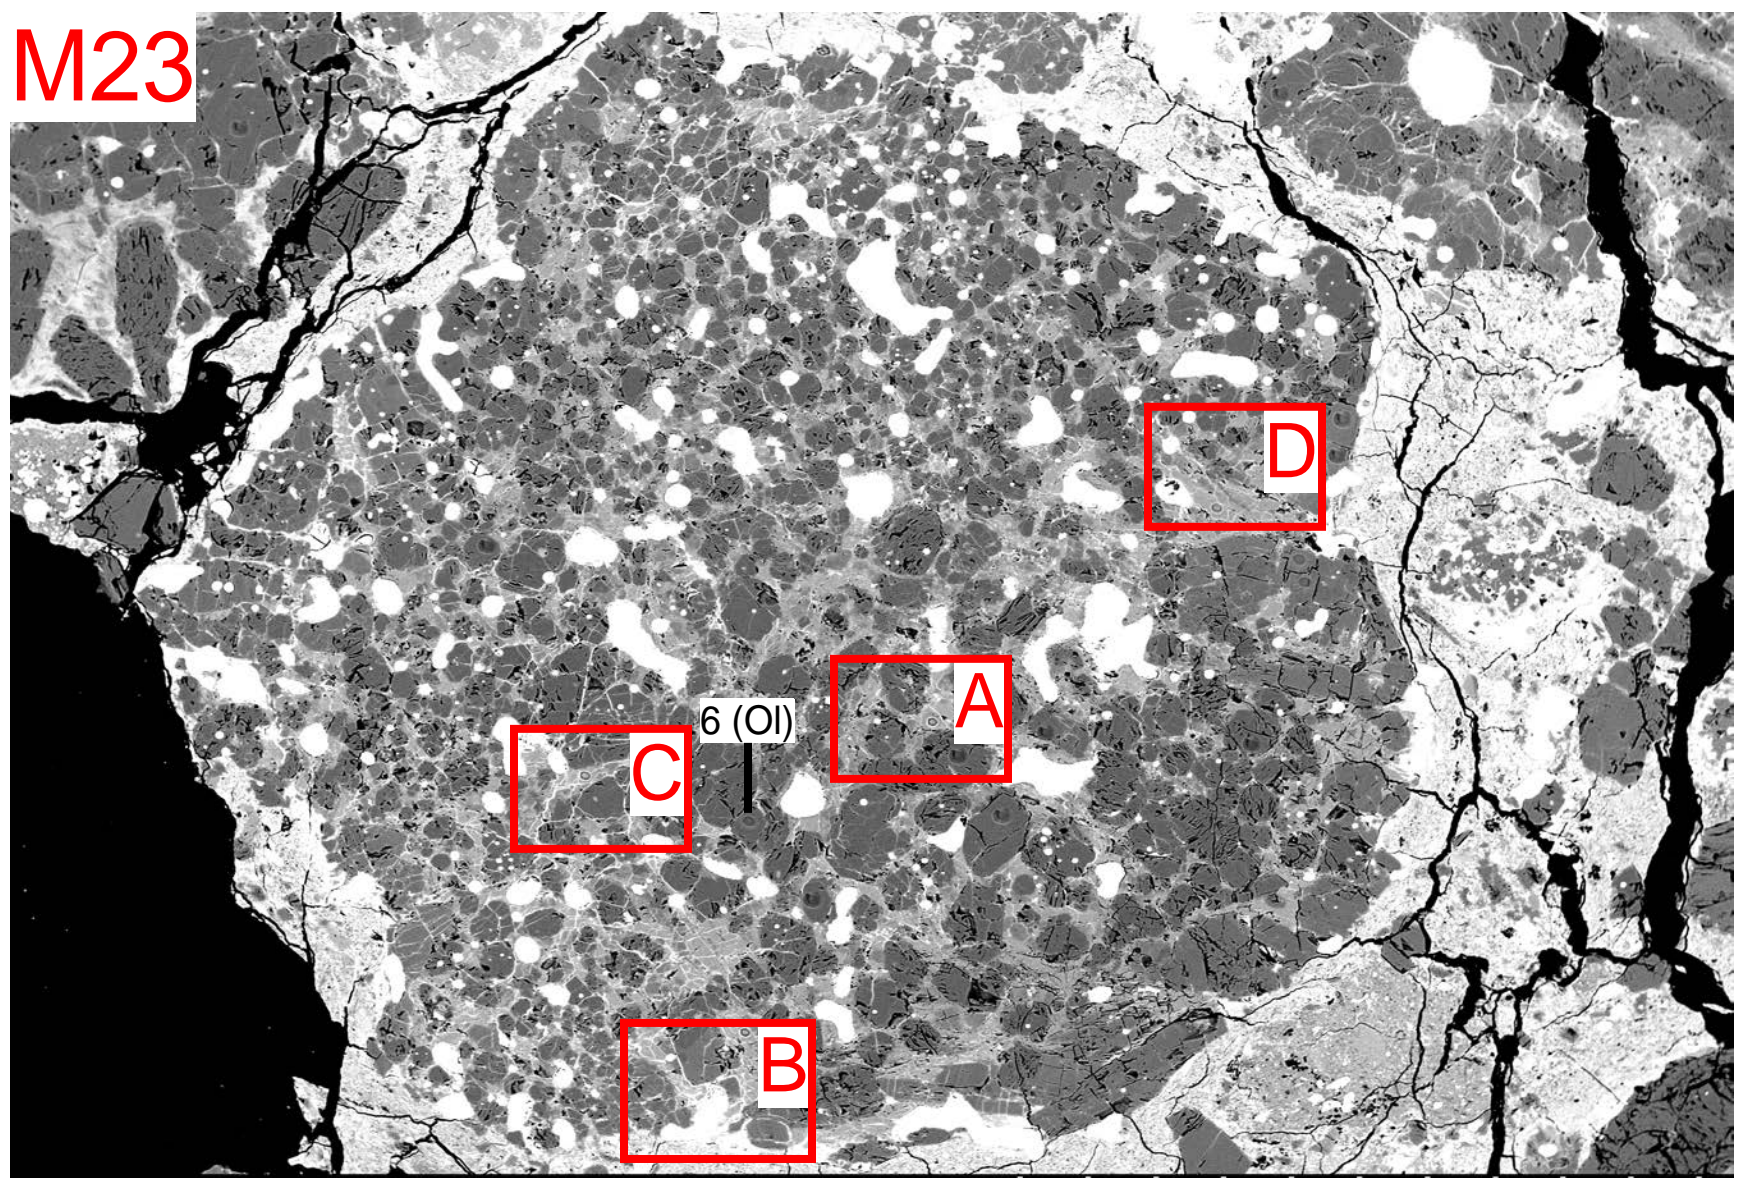

C

A

D

B

6 (O)

M23 15.0kV x100 BSECOMP

500um



M23. A

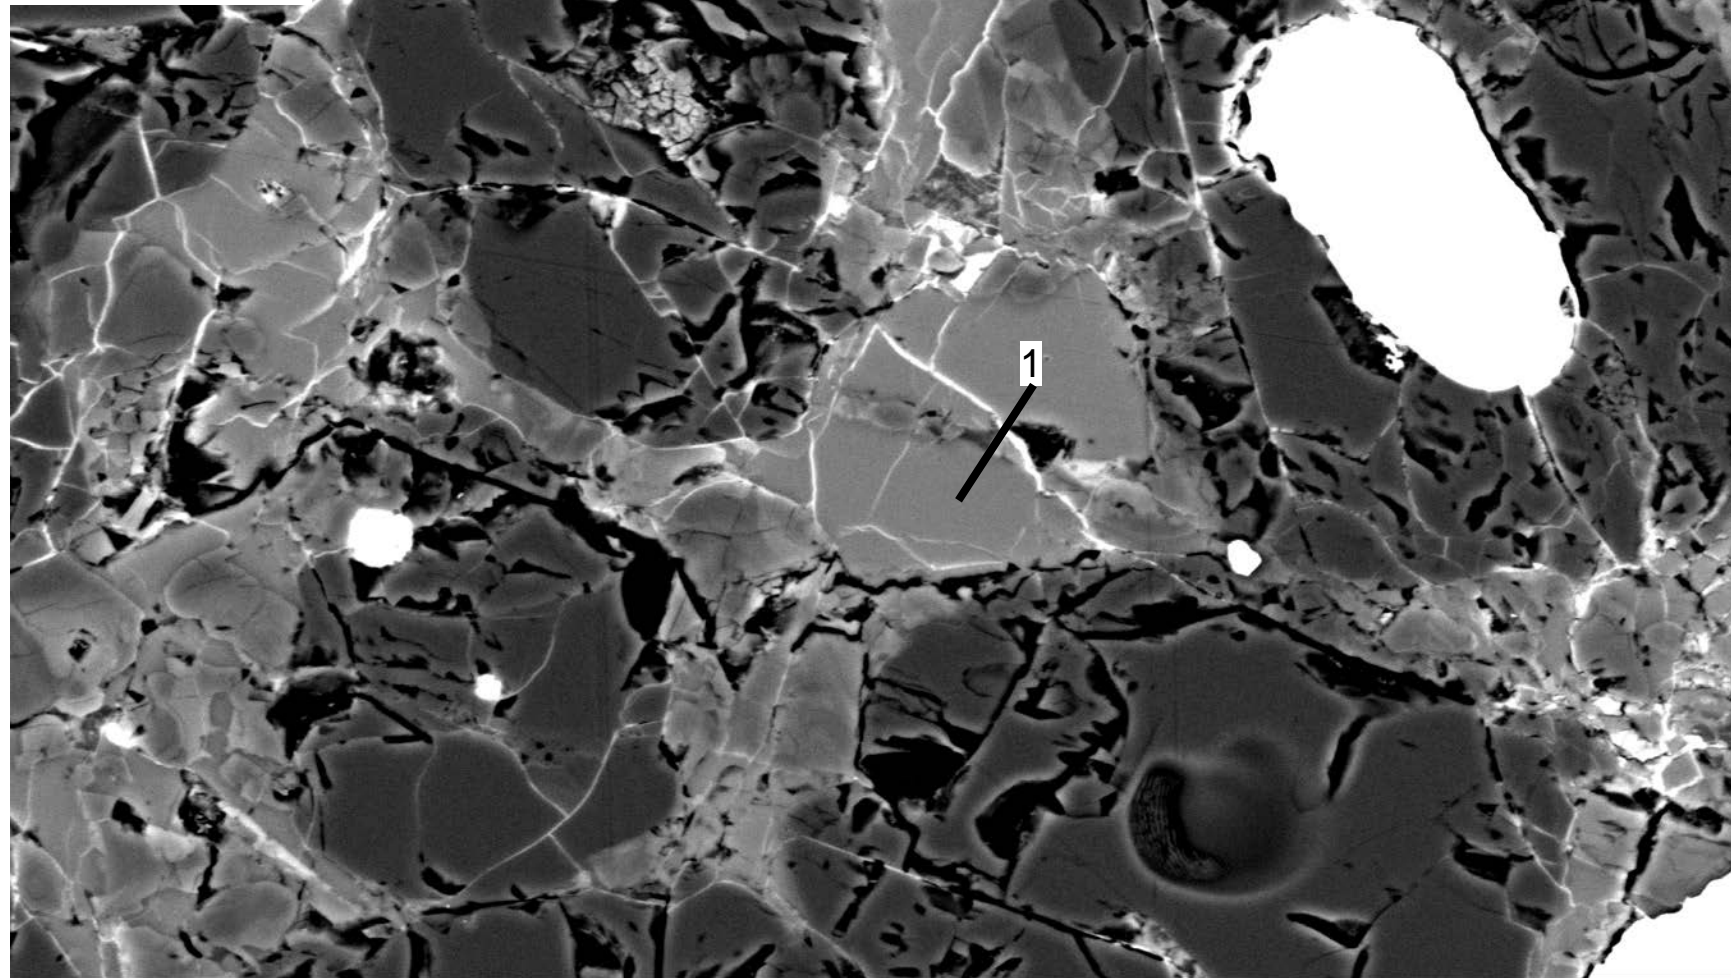

M23 15.0kV x1.00k BSECOMP

50.0um



M23. B

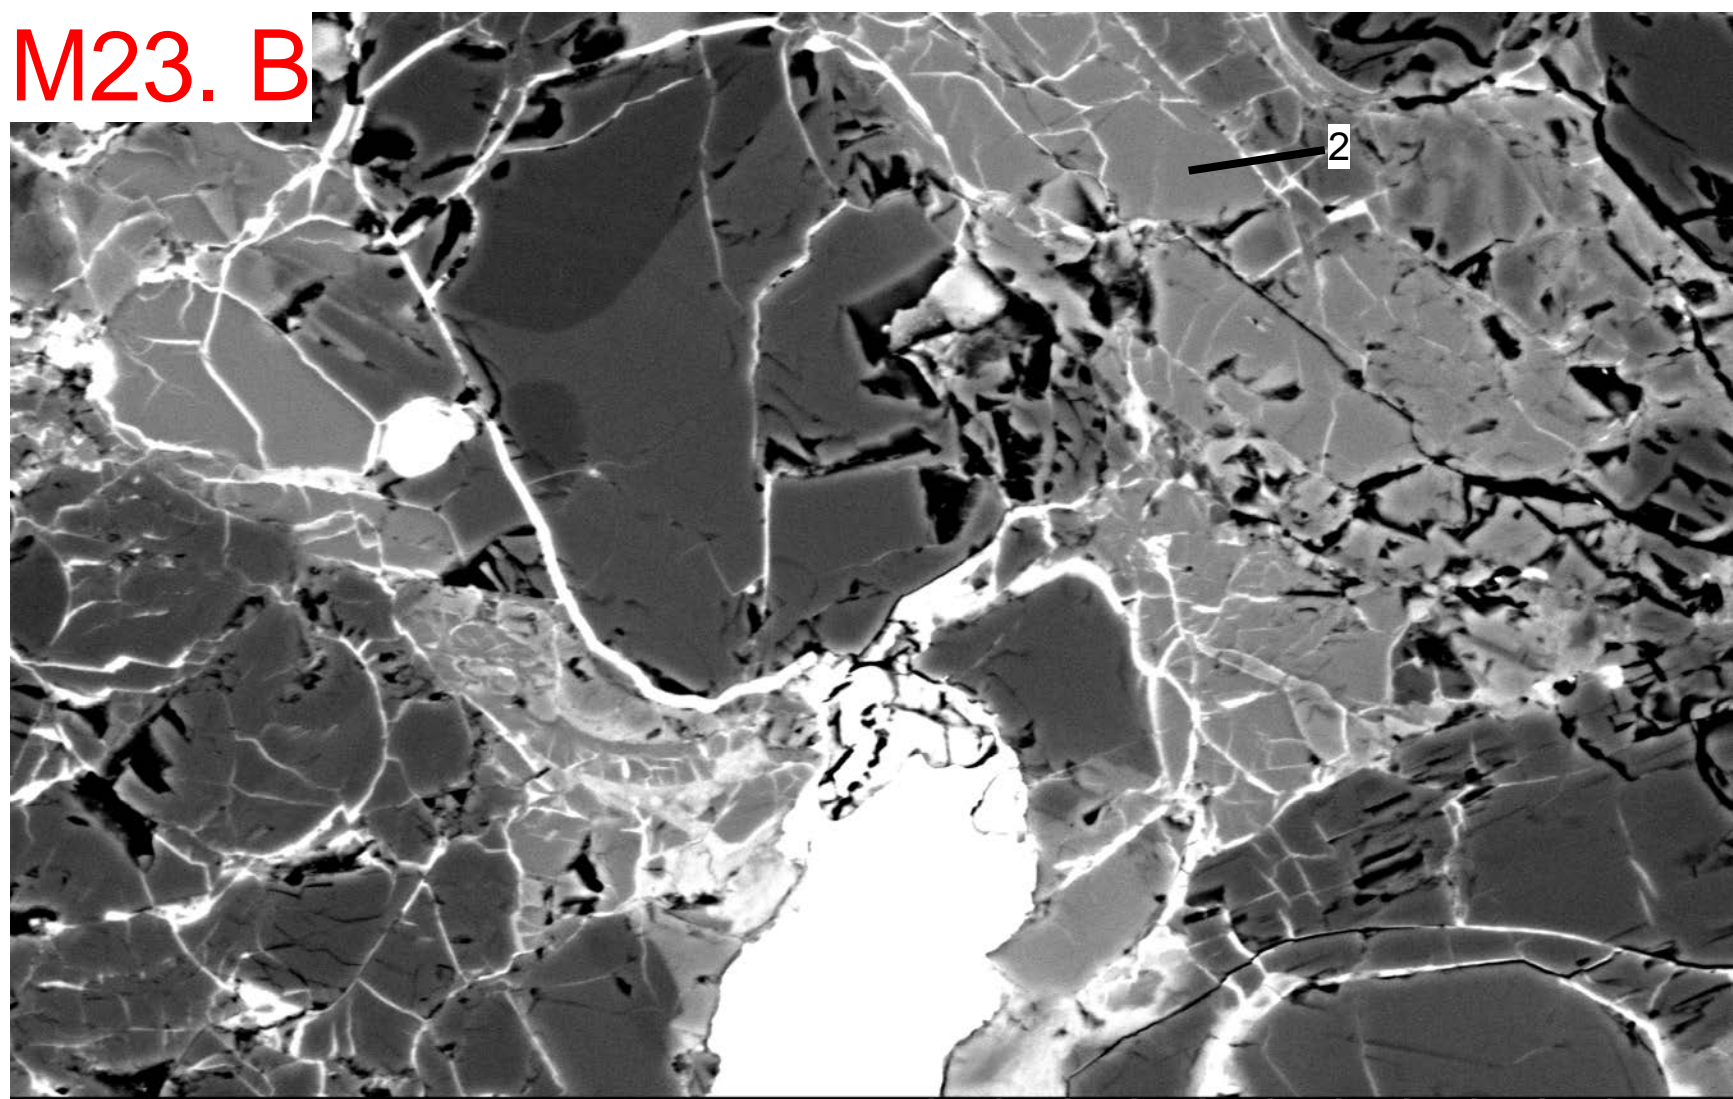

M23 15.0kV x1.00k BSECOMP

50.0um

M23. C

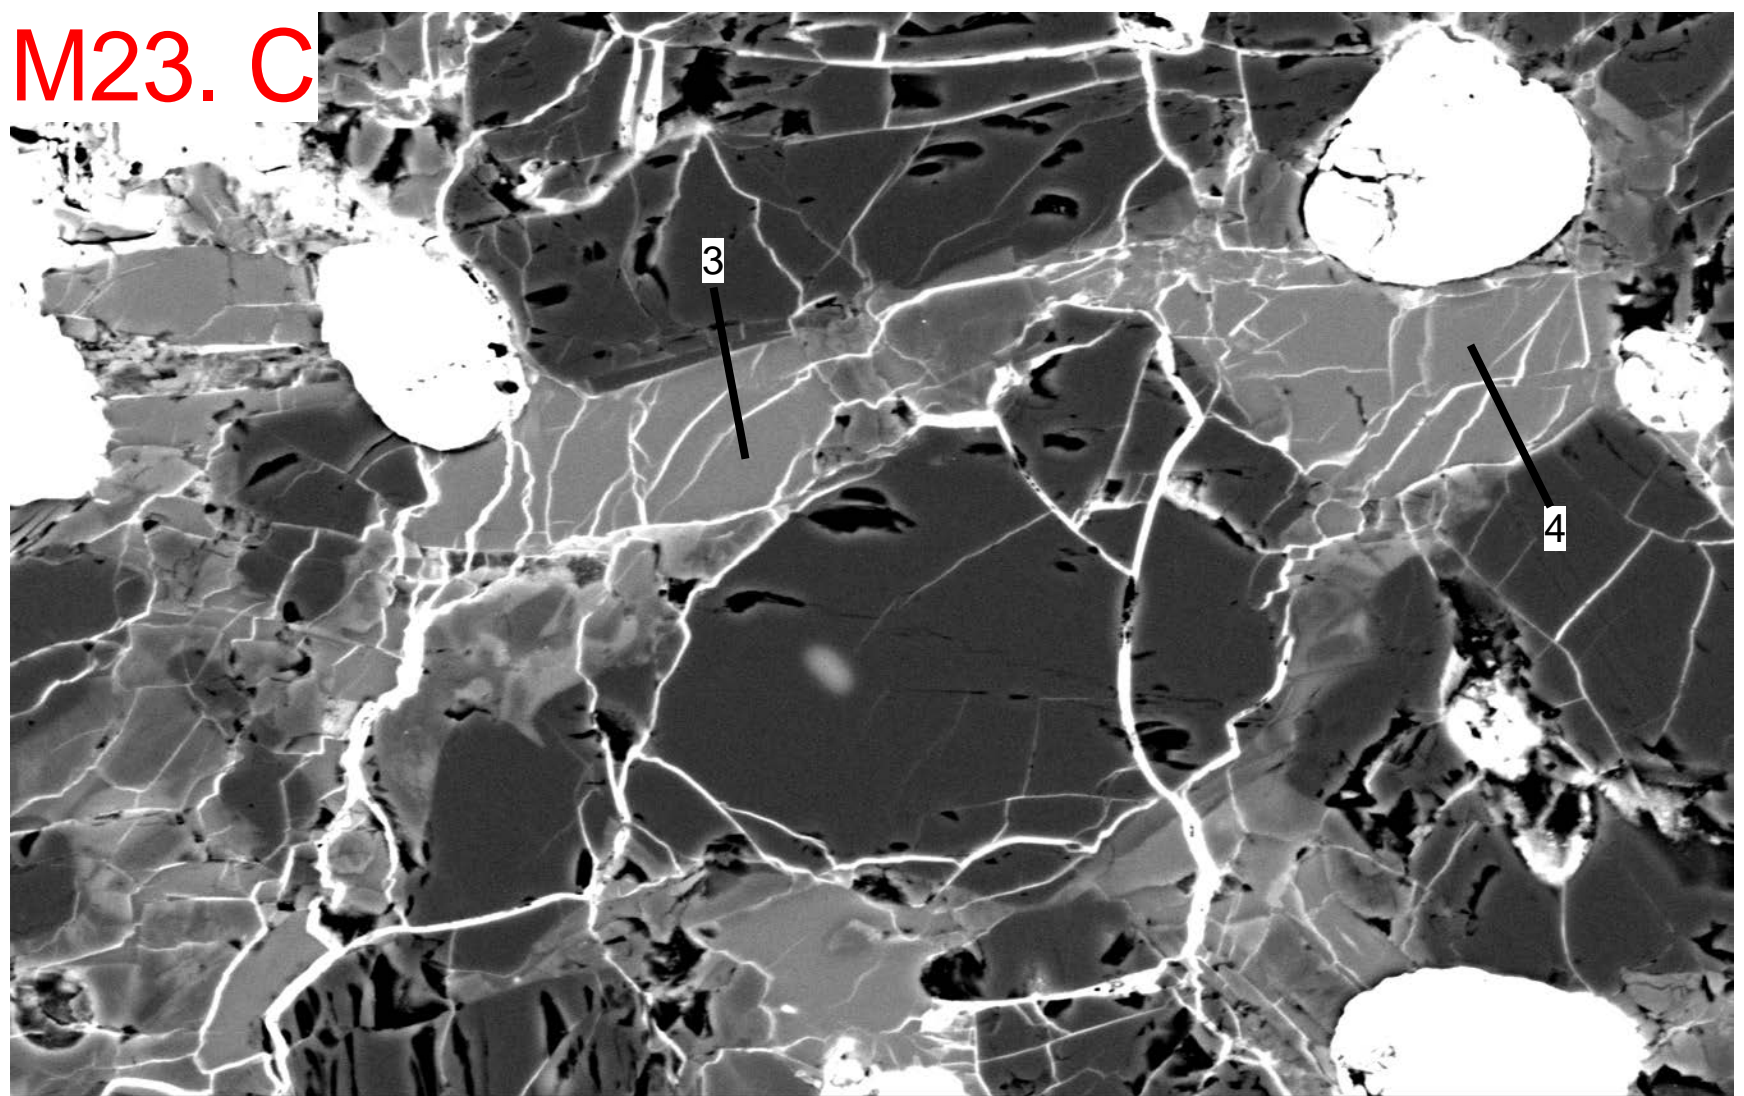

M23 15.0kV x1.00k BSECOMP

50.0um



M23. D

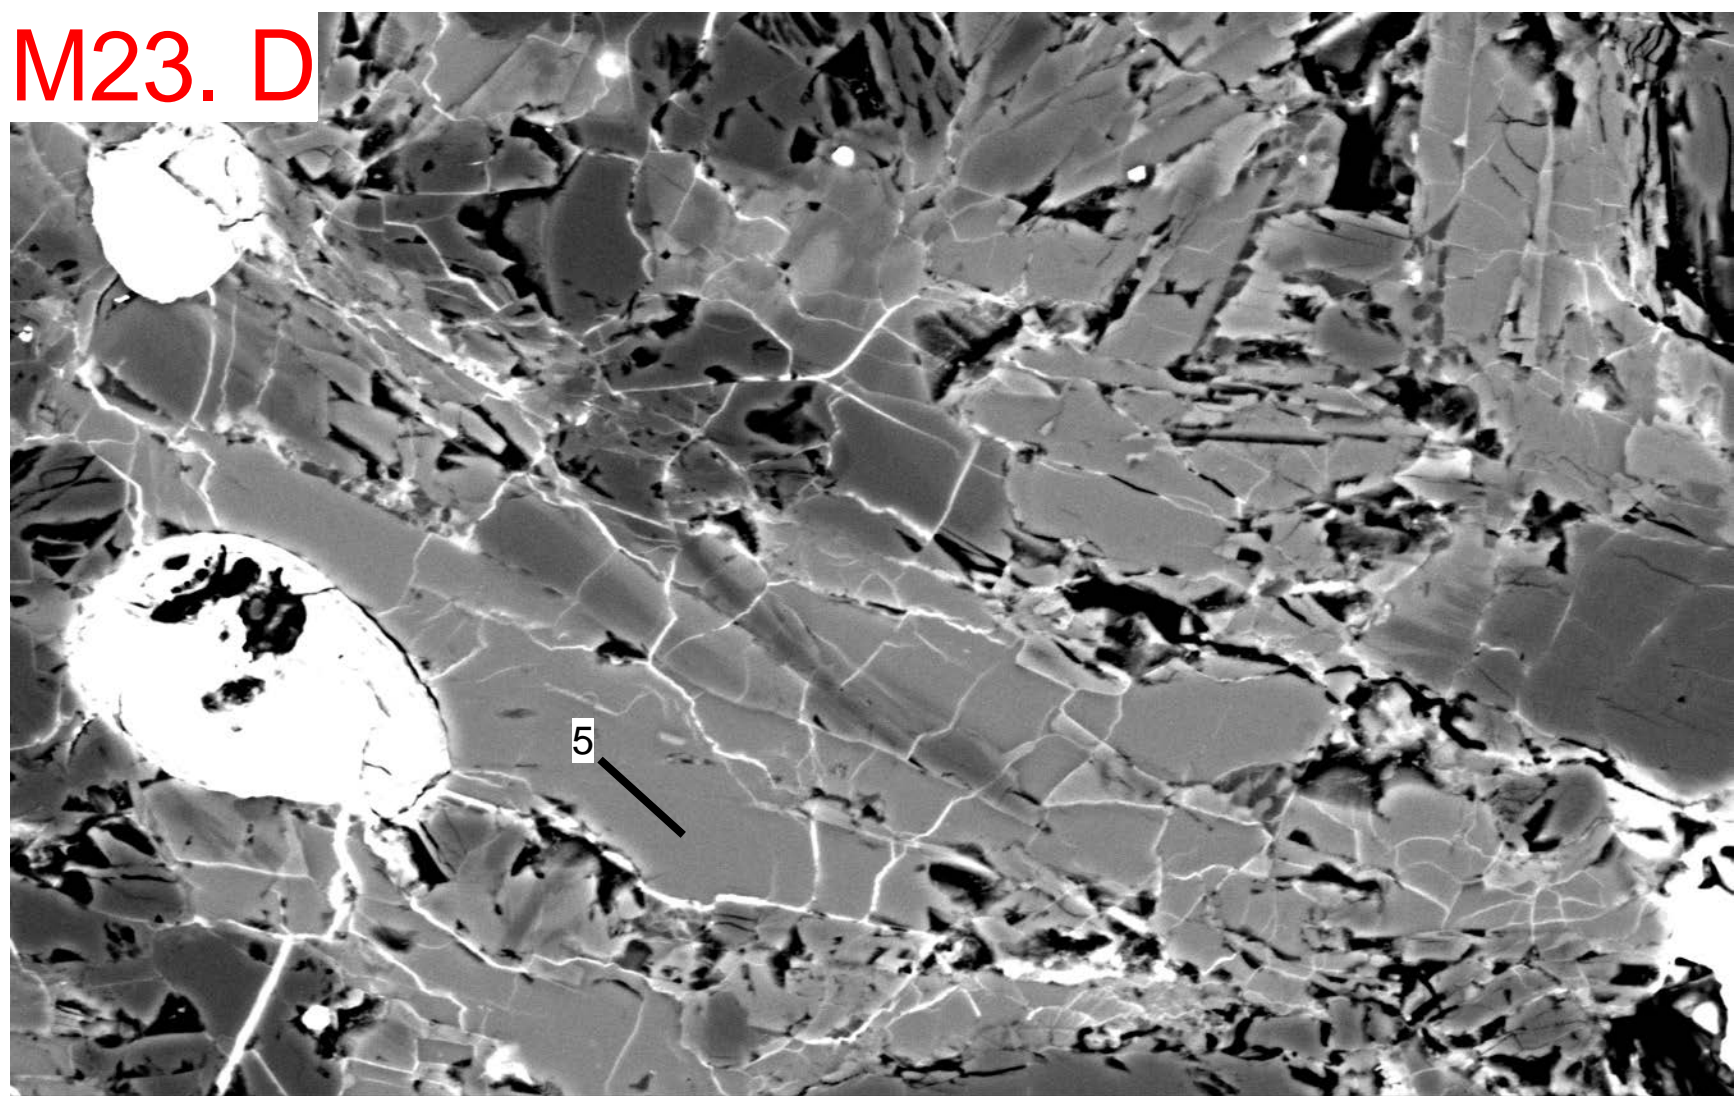

M23 15.0kV x1.00k BSECOMP

50.0um

M23. 1

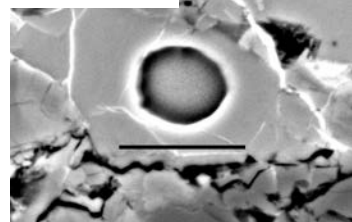

2

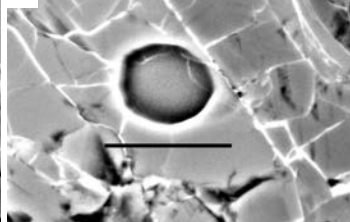

3

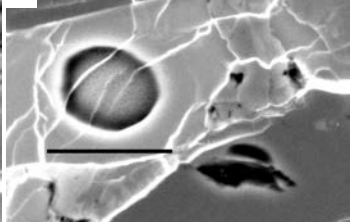

4

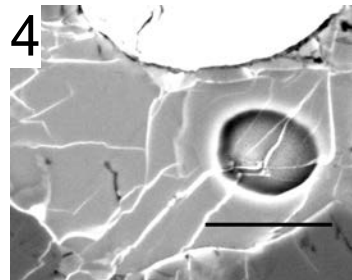

5

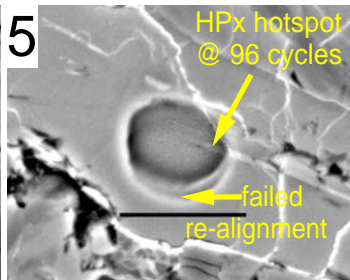

6 (OI)

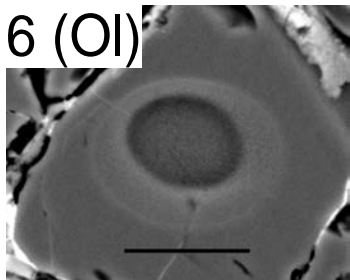

Supplement: NIHMS1567231-supplement-EA4.pdf [file NIHMS1567231-supplement-EA4.pdf]
