# Supplementary material
Source: PubMed Central journal article supplement (PMC7121246)
Supplement: NIHMS1567231-supplement-EA2.pdf [file NIHMS1567231-supplement-EA2.pdf]

**EA2: SIMS Al-Mg isotope measurements of olivine, pyroxene and plagioclase standards, and calibration data for unknowns.**

Details of the instrumental bias correction for Mg-isotopes are given in EA1 from Ushikubo et al. (2017)

**Table EA2-1: SIMS olivine standard data correction factors for Mg isotopes of unknowns**

| sample name                                | spot #  | measured raw values             |                          |            |                            |            |                             |            | relative bias to SC-OI bracket |            |                          |            |
|--------------------------------------------|---------|---------------------------------|--------------------------|------------|----------------------------|------------|-----------------------------|------------|--------------------------------|------------|--------------------------|------------|
|                                            |         | <sup>24</sup> Mg yield (cps/nA) | $\delta^{25}\text{Mg}_m$ | (2SE/2SD)  | $\Delta^{26}\text{Mg}_m^*$ | (2SE/2SD)  | $\delta^{25}\text{Mg}$ bias | 2SD        | $\delta^{25}\text{Mg}$         | 2SD        | $\Delta^{26}\text{Mg}^*$ | 2SD        |
| SC-OI                                      | 1       | 0.772                           | -2.73                    | 0.05       | 0.20                       | 0.07       | -2.66                       |            |                                |            |                          |            |
| Mg#=89.                                    | 2       | 0.782                           | -2.74                    | 0.04       | 0.21                       | 0.08       | -2.67                       |            |                                |            |                          |            |
| $\delta^{25}\text{Mg}=-0.072\text{‰}$ DSM. | 3       | 0.781                           | -2.69                    | 0.05       | 0.15                       | 0.09       | -2.62                       |            |                                |            |                          |            |
|                                            | 4       | 0.781                           | -2.71                    | 0.04       | 0.14                       | 0.06       | -2.64                       |            |                                |            |                          |            |
| HN-OI.                                     | 1       | 0.786                           | -3.98                    | 0.05       | 0.22                       | 0.06       | -3.62                       | -0.95      |                                | -0.02      |                          |            |
| Mg#=100.                                   | 2       | 0.787                           | -4.00                    | 0.06       | 0.19                       | 0.05       | -3.63                       | -0.96      |                                | -0.05      |                          |            |
| synthetic forsterite.                      | 3       | 0.777                           | -3.94                    | 0.06       | 0.15                       | 0.07       | -3.58                       | -0.91      |                                | -0.09      |                          |            |
| $\delta^{25}\text{Mg}=-0.366\text{‰}$ DSM. | 4       | 0.778                           | -3.98                    | 0.06       | 0.20                       | 0.08       | -3.62                       | -0.95      |                                | -0.04      |                          |            |
|                                            | average | 0.782                           | -3.98                    | $\pm 0.05$ | 0.19                       | $\pm 0.06$ | -3.61                       | $\pm 0.05$ | -0.94                          | $\pm 0.05$ | -0.05                    | $\pm 0.06$ |
| OR-OI.                                     | 1       | 0.733                           | -0.53                    | 0.04       | 0.06                       | 0.06       | -0.51                       | 2.17       |                                | -0.17      |                          |            |
| Mg#=60.                                    | 2       | 0.730                           | -0.49                    | 0.03       | 0.11                       | 0.06       | -0.48                       | 2.20       |                                | -0.13      |                          |            |
| $\delta^{25}\text{Mg}=-0.013\text{‰}$ DSM. | 3       | 0.743                           | -0.47                    | 0.04       | 0.16                       | 0.08       | -0.46                       | 2.22       |                                | -0.08      |                          |            |
|                                            | 4       | 0.740                           | -0.51                    | 0.04       | 0.17                       | 0.07       | -0.49                       | 2.18       |                                | -0.06      |                          |            |
|                                            | average | 0.737                           | -0.50                    | $\pm 0.05$ | 0.13                       | $\pm 0.10$ | -0.49                       | $\pm 0.05$ | 2.19                           | $\pm 0.05$ | -0.11                    | $\pm 0.10$ |
| SC-OI                                      | 1       | 0.773                           | -2.80                    | 0.03       | 0.38                       | 0.07       | -2.73                       |            |                                |            |                          |            |
| Mg#=89.                                    | 2       | 0.776                           | -2.74                    | 0.03       | 0.26                       | 0.07       | -2.67                       |            |                                |            |                          |            |
| $\delta^{25}\text{Mg}=-0.072\text{‰}$ DSM. | 3       | 0.781                           | -2.76                    | 0.03       | 0.26                       | 0.07       | -2.69                       |            |                                |            |                          |            |
|                                            | 4       | 0.780                           | -2.77                    | 0.03       | 0.31                       | 0.07       | -2.70                       |            |                                |            |                          |            |
|                                            | bracket | 0.778                           | -2.74                    | $\pm 0.07$ | 0.24                       | $\pm 0.16$ | -2.67                       | $\pm 0.07$ |                                |            |                          |            |

**Table EA2-2: SIMS low-Ca pyroxene standard data and correction factors for Mg isotopes of unknowns**

| sample name                                | spot #  | measured raw values             |                          |            |                            |            |                             |            | relative bias to the Sp79-11 bracket |            |                          |            |
|--------------------------------------------|---------|---------------------------------|--------------------------|------------|----------------------------|------------|-----------------------------|------------|--------------------------------------|------------|--------------------------|------------|
|                                            |         | <sup>24</sup> Mg yield (cps/nA) | $\delta^{25}\text{Mg}_m$ | (2SE/2SD)  | $\Delta^{26}\text{Mg}_m^*$ | (2SE/2SD)  | $\delta^{25}\text{Mg}$ bias | 2SD        | $\delta^{25}\text{Mg}$               | 2SD        | $\Delta^{26}\text{Mg}^*$ | 2SD        |
| SP79-11 Opx.                               | 1       | 0.675                           | -0.11                    | 0.06       | 0.33                       | 0.07       | -0.05                       |            |                                      |            |                          |            |
| En97, Wo0.5.                               | 2       | 0.668                           | -0.10                    | 0.05       | 0.44                       | 0.07       | -0.04                       |            |                                      |            |                          |            |
| $\delta^{25}\text{Mg}=-0.058\text{‰}$ DSM. | 3       | 0.670                           | -0.13                    | 0.04       | 0.35                       | 0.08       | -0.07                       |            |                                      |            |                          |            |
|                                            | 4       | 0.667                           | -0.11                    | 0.04       | 0.28                       | 0.08       | -0.05                       |            |                                      |            |                          |            |
| IG-Opx.                                    | 1       | 0.629                           | 0.48                     | 0.05       | 0.36                       | 0.05       | 0.52                        | 0.58       |                                      | 0.02       |                          |            |
| En89, Wo1.                                 | 2       | 0.635                           | 0.43                     | 0.05       | 0.31                       | 0.08       | 0.47                        | 0.52       |                                      | -0.03      |                          |            |
| $\delta^{25}\text{Mg}=-0.037\text{‰}$ DSM. | 3       | 0.628                           | 0.52                     | 0.05       | 0.35                       | 0.07       | 0.56                        | 0.61       |                                      | 0.00       |                          |            |
|                                            | 4       | 0.635                           | 0.57                     | 0.06       | 0.29                       | 0.08       | 0.61                        | 0.66       |                                      | -0.06      |                          |            |
|                                            | average | 0.632                           | 0.50                     | $\pm 0.12$ | 0.33                       | $\pm 0.07$ | 0.54                        | $\pm 0.12$ | 0.59                                 | $\pm 0.12$ | -0.02                    | $\pm 0.07$ |
| SP79-11.                                   | 1       | 0.668                           | -0.17                    | 0.05       | 0.33                       | 0.07       | -0.11                       |            |                                      |            |                          |            |
| En97, Wo0.5.                               | 2       | 0.668                           | -0.07                    | 0.06       | 0.34                       | 0.06       | -0.01                       |            |                                      |            |                          |            |
| $\delta^{25}\text{Mg}=-0.058\text{‰}$ DSM. | 3       | 0.670                           | -0.09                    | 0.05       | 0.32                       | 0.08       | -0.04                       |            |                                      |            |                          |            |
|                                            | 4       | 0.669                           | -0.12                    | 0.05       | 0.39                       | 0.07       | -0.06                       |            |                                      |            |                          |            |
|                                            | bracket | 0.669                           | -0.11                    | $\pm 0.06$ | 0.35                       | $\pm 0.10$ | -0.05                       | $\pm 0.06$ |                                      |            |                          |            |

**Table EA2-3: SIMS anorthite glass standard data and correction factors for Mg isotopes of unknowns**

| sample name                               | analysis #                             | measured raw values      |        |                            |                    |                                 |        |
|-------------------------------------------|----------------------------------------|--------------------------|--------|----------------------------|--------------------|---------------------------------|--------|
|                                           |                                        | $\delta^{25}\text{Mg}_m$ | (2 SE) | $\Delta^{26}\text{Mg}_m^*$ | (2 SE)             | $^{27}\text{Al}/^{24}\text{Mg}$ | (2 SE) |
| session 1.                                | 1                                      | -2.40                    | 0.43   | 0.26                       | 0.82               | 35.52                           | 0.18   |
| 1 wt.% MgO An-glass.                      | 2                                      | -1.60                    | 0.49   | -0.01                      | 0.96               | 35.70                           | 0.15   |
| $\delta^{25}\text{Mg}=-1.77\text{‰}$ DSM. | 3                                      | -1.66                    | 0.49   | 0.38                       | 0.92               | 35.67                           | 0.17   |
| $^{27}\text{Al}/^{24}\text{Mg}$ : 34.59.  | 4                                      | -1.55                    | 0.55   | -0.07                      | 1.07               | 35.79                           | 0.20   |
| 300 cycles per analysis.                  | 5                                      | -0.78                    | 0.94   | -0.30                      | 1.84               | 36.39                           | 0.20   |
|                                           | 6                                      | -1.94                    | 0.91   | 0.79                       | 1.84               | 36.38                           | 0.25   |
|                                           | 7                                      | -0.96                    | 0.86   | -0.13                      | 1.64               | 36.29                           | 0.20   |
|                                           | 8                                      | -1.71                    | 0.78   | 1.04                       | 1.50               | 36.23                           | 0.22   |
|                                           | 9                                      | -1.77                    | 0.43   | -0.39                      | 0.82               | 36.02                           | 0.17   |
|                                           | average, 2SE <sup>(a)</sup>            | -1.60                    | 0.32   | 0.17                       | 0.33               | 36.00                           | 0.22   |
|                                           | $(\alpha-1)\times 1000$ <sup>(b)</sup> | 0.17                     | 0.32   |                            | RSF <sup>(c)</sup> | 1.041                           | 0.006  |
| sample name                               | analysis #                             | measured raw values      |        |                            |                    |                                 |        |
|                                           |                                        | $\delta^{25}\text{Mg}_m$ | (2 SE) | $\Delta^{26}\text{Mg}_m^*$ | (2 SE)             | $^{27}\text{Al}/^{24}\text{Mg}$ | (2 SE) |
| session 2.                                | 1                                      | -0.49                    | 0.65   | -0.38                      | 1.09               | 36.01                           | 0.21   |
| 1 wt.% MgO An-glass.                      | 2                                      | 0.00                     | 0.65   | -1.28                      | 1.14               | 35.85                           | 0.21   |
| $\delta^{25}\text{Mg}=-1.77\text{‰}$ DSM. | 3                                      | -0.56                    | 0.67   | 0.28                       | 1.20               | 35.91                           | 0.22   |
| $^{27}\text{Al}/^{24}\text{Mg}$ : 34.59.  | 4                                      | -1.45                    | 0.44   | -0.31                      | 0.87               | 35.56                           | 0.17   |
| 300 cycles per analysis.                  | 5                                      | -1.38                    | 0.51   | -1.26                      | 0.92               | 35.56                           | 0.18   |
|                                           | 6                                      | -1.67                    | 0.40   | -0.33                      | 0.77               | 36.04                           | 0.22   |
|                                           | 7                                      | -0.98                    | 0.61   | -0.67                      | 1.14               | 35.67                           | 0.20   |
|                                           | 8                                      | -0.63                    | 0.62   | -0.99                      | 1.17               | 35.66                           | 0.22   |
|                                           | 9                                      | -1.10                    | 0.69   | 0.04                       | 1.36               | 35.82                           | 0.22   |
|                                           | 10                                     | -1.60                    | 0.69   | 0.20                       | 1.33               | 35.75                           | 0.24   |
|                                           | 11                                     | -1.37                    | 0.69   | -0.34                      | 1.29               | 36.30                           | 0.23   |
|                                           | 12                                     | -1.04                    | 0.68   | -0.25                      | 1.31               | 36.30                           | 0.25   |
|                                           | 13                                     | -1.19                    | 0.56   | 0.03                       | 1.02               | 35.90                           | 0.21   |
|                                           | 14                                     | -1.23                    | 0.41   | -0.95                      | 0.79               | 35.81                           | 0.17   |
|                                           | 15                                     | -2.04                    | 0.32   | 0.06                       | 0.60               | 35.87                           | 0.16   |
|                                           | 16                                     | -1.94                    | 0.32   | -0.47                      | 0.59               | 36.00                           | 0.15   |
|                                           | average, 2SE <sup>(a)</sup>            | -1.17                    | 0.27   | -0.41                      | 0.25               | 35.88                           | 0.11   |
|                                           | $(\alpha-1)\times 1000$ <sup>(b)</sup> | 0.60                     | 0.27   |                            | RSF <sup>(c)</sup> | 1.037                           | 0.003  |
| sample name                               | analysis #                             | measured raw values      |        |                            |                    |                                 |        |
|                                           |                                        | $\delta^{25}\text{Mg}_m$ | (2 SE) | $\Delta^{26}\text{Mg}_m^*$ | (2 SE)             | $^{27}\text{Al}/^{24}\text{Mg}$ | (2 SE) |
| Session 3.                                | 1                                      | -0.95                    | 0.53   | 0.28                       | 1.02               | 35.45                           | 0.18   |
| 1 wt.% MgO An-glass.                      | 2                                      | -1.24                    | 0.53   | 0.09                       | 1.03               | 35.46                           | 0.18   |
| $\delta^{25}\text{Mg}=-1.77\text{‰}$ DSM. | 3                                      | -1.73                    | 0.54   | -0.27                      | 1.04               | 35.77                           | 0.18   |
| $^{27}\text{Al}/^{24}\text{Mg}$ : 34.59.  | 4                                      | -1.78                    | 0.59   | 0.40                       | 1.21               | 35.90                           | 0.19   |
| 400 cycles per analysis.                  | 5                                      | -1.41                    | 0.59   | -0.04                      | 1.13               | 35.94                           | 0.18   |
|                                           | 6                                      | -1.56                    | 0.59   | -0.35                      | 1.18               | 35.93                           | 0.19   |
|                                           | 7                                      | -1.63                    | 0.60   | -0.18                      | 1.21               | 35.87                           | 0.20   |
|                                           | 8                                      | -1.39                    | 0.57   | -0.46                      | 1.05               | 36.35                           | 0.17   |
|                                           | 9                                      | -2.04                    | 0.55   | -0.09                      | 1.07               | 36.42                           | 0.19   |
|                                           | 10                                     | -1.74                    | 0.49   | -0.38                      | 0.94               | 36.00                           | 0.16   |
|                                           | 11                                     | -2.20                    | 0.45   | -0.24                      | 0.89               | 36.07                           | 0.15   |
|                                           | 12                                     | -1.91                    | 0.42   | -0.43                      | 0.84               | 35.99                           | 0.14   |
|                                           | 13                                     | -2.22                    | 0.43   | -0.45                      | 0.84               | 36.08                           | 0.14   |
|                                           | 14                                     | -1.95                    | 0.49   | -0.36                      | 0.99               | 35.97                           | 0.20   |
|                                           | 15                                     | -1.78                    | 0.61   | -1.09                      | 1.15               | 36.01                           | 0.23   |
|                                           | 16                                     | -2.50                    | 0.64   | -0.10                      | 1.16               | 35.97                           | 0.24   |
|                                           | 17                                     | -1.94                    | 0.84   | -0.66                      | 1.48               | 36.86                           | 0.71   |
|                                           | average, 2SE <sup>(a)</sup>            | -1.76                    | 0.19   | -0.26                      | 0.17               | 36.00                           | 0.16   |
|                                           | $(\alpha-1)\times 1000$ <sup>(b)</sup> | 0.01                     | 0.19   |                            | RSF <sup>(c)</sup> | 1.041                           | 0.005  |

<sup>(a)</sup> in the averages rows, reported 2SE values represent those compiled from

the  $\delta^{25}\text{Mg}_m$ ,  $\Delta^{26}\text{Mg}_m^*$ , and  $^{27}\text{Al}/^{24}\text{Mg}$  columns, respectively

<sup>(b)</sup>  $\alpha = (1 + \delta^{25}\text{Mg}_{\text{raw}}/1000)/(1 + \delta^{25}\text{Mg}_{\text{DSM}}/1000)$

<sup>(c)</sup>  $\text{RSF} = (^{27}\text{Al}/^{24}\text{Mg})_{\text{measured}}/(^{27}\text{Al}/^{24}\text{Mg})_{\text{known}}$

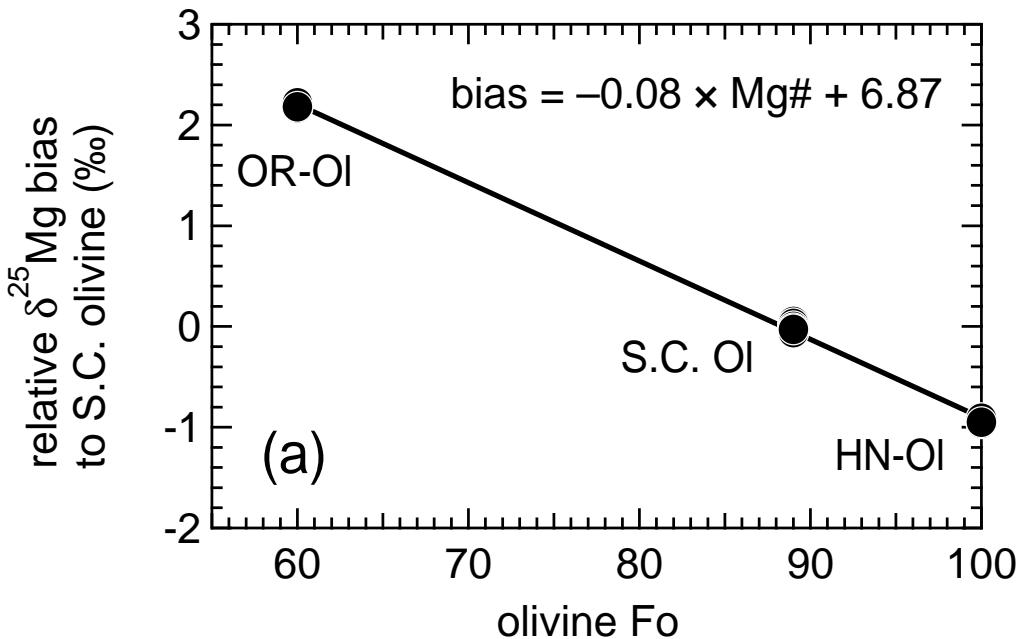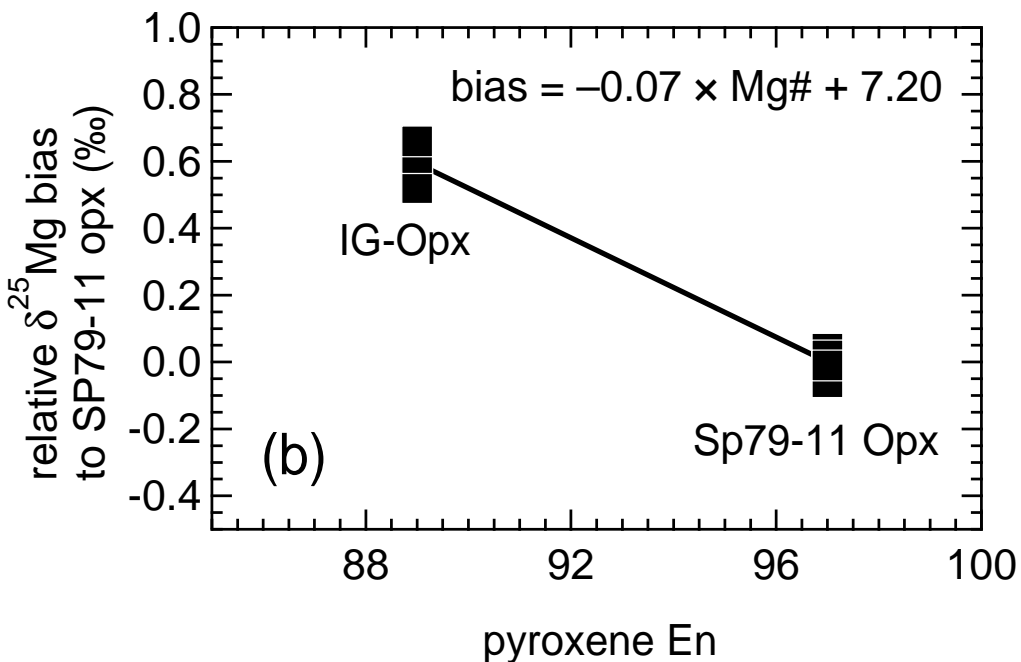

Fig. EA2-1. SIMS instrumental bias calibration curves for (a) olivine and (b) low-Ca pyroxene.
