# Supplementary material
Source: PubMed Central journal article supplement (PMC7121246)
Supplement: NIHMS1567231-supplement-EA3.pdf [file NIHMS1567231-supplement-EA3.pdf]

EA3: SIMS Al-Mg isotope measurements of olivine and pyroxene in chondrules

Table EA3-1: SIMS Al-Mg isotope measurements of olivine and pyroxene in chondrules

| #  | Description (# in Table 2) | <sup>24</sup> Mg yield (cps/nA) | chondrule Fo or En | measured raw values        |             |                            |             |                                        |         | $\delta^{25}\text{Mg}$ ( $\pm 2\%$ ) | Corrected data                     |                     |                   |      |
|----|----------------------------|---------------------------------|--------------------|----------------------------|-------------|----------------------------|-------------|----------------------------------------|---------|--------------------------------------|------------------------------------|---------------------|-------------------|------|
|    |                            |                                 |                    | $\delta^{25}\text{Mg}_m$ ‰ | 2SE/2SD     | $\Delta^{26}\text{Mg}_m$ ‰ | 2SE/2SD     | <sup>27</sup> Al/ <sup>24</sup> Mg Raw | 2SE %   |                                      | <sup>27</sup> Al/ <sup>24</sup> Mg | unc. ( $\pm 10\%$ ) | $d^{26}\text{Mg}$ | 2SE  |
| 30 | SC-OI                      | 0.78                            |                    | -2.77                      | 0.04        | 0.19                       | 0.07        | 3.3E-04                                | 6.3E-06 |                                      |                                    |                     |                   |      |
| 31 | SC-OI                      | 0.78                            |                    | -2.79                      | 0.04        | 0.28                       | 0.06        | 3.2E-04                                | 6.6E-06 |                                      |                                    |                     |                   |      |
| 32 | SC-OI                      | 0.78                            |                    | -2.78                      | 0.03        | 0.24                       | 0.06        | 3.2E-04                                | 6.8E-06 |                                      |                                    |                     |                   |      |
| 33 | SC-OI                      | 0.78                            |                    | -2.79                      | 0.04        | 0.29                       | 0.06        | 3.2E-04                                | 1.0E-05 |                                      |                                    |                     |                   |      |
|    | <b>Mean SC-OI bracket</b>  | <b>0.78</b>                     |                    | <b>-2.76</b>               | <b>0.07</b> | <b>0.27</b>                | <b>0.08</b> |                                        |         |                                      |                                    |                     |                   |      |
| 34 | M6 ol (#6)                 | 0.84                            | 98.9               | -2.12                      | 0.06        | 0.32                       | 0.07        | 6.5E-04                                | 7.7E-06 | -0.13                                | 0.0007                             | 0.00007             | 0.05              | 0.08 |
| 35 | M6 ol (#7)                 | 0.83                            | 98.9               | -2.15                      | 0.03        | 0.31                       | 0.06        | 1.1E-03                                | 1.4E-05 | -0.13                                | 0.0013                             | 0.00013             | 0.04              | 0.08 |
| 36 | M23 ol (#6)                | 0.82                            | 99.2               | -2.21                      | 0.05        | 0.26                       | 0.05        | 3.4E-04                                | 5.8E-06 | -0.13                                | 0.0004                             | 0.00004             | -0.01             | 0.08 |
| 39 | Q7 ol (#9)                 | 0.83                            | 99.0               | -2.26                      | 0.06        | 0.30                       | 0.06        | 3.3E-04                                | 5.3E-06 | -0.13                                | 0.0004                             | 0.00004             | 0.03              | 0.08 |
| 40 | Q7 ol (#10)                | 0.83                            | 99.0               | -2.27                      | 0.04        | 0.32                       | 0.06        | 2.9E-04                                | 4.9E-06 | -0.13                                | 0.0003                             | 0.00003             | 0.05              | 0.08 |
| 41 | Q13 ol (#6)                | 0.81                            | 98.4               | -2.42                      | 0.05        | 0.20                       | 0.06        | 2.4E-03                                | 2.0E-05 | -0.13                                | 0.0027                             | 0.00027             | -0.07             | 0.08 |
| 42 | Q13 ol (#5)                | 0.84                            | 98.4               | -1.68                      | 0.06        | 0.25                       | 0.08        | 1.5E-03                                | 6.4E-06 | -0.13                                | 0.0017                             | 0.00017             | -0.02             | 0.08 |
| 43 | Q15 ol (#8)                | 0.84                            | 98.6               | -1.79                      | 0.05        | 0.25                       | 0.05        | 5.8E-04                                | 1.3E-05 | -0.13                                | 0.0007                             | 0.00007             | -0.02             | 0.08 |
| 44 | Q15 ol (#9)                | 0.84                            | 98.6               | -1.93                      | 0.05        | 0.25                       | 0.06        | 1.5E-03                                | 1.8E-05 | -0.13                                | 0.0017                             | 0.00017             | -0.02             | 0.08 |
| 45 | Q16 ol (#6)                | 0.83                            | 98.9               | -2.24                      | 0.05        | 0.27                       | 0.06        | 2.5E-04                                | 6.6E-06 | -0.13                                | 0.0003                             | 0.00003             | 0.00              | 0.08 |
| 46 | Q16 ol (#7)                | 0.83                            | 98.9               | -2.25                      | 0.04        | 0.25                       | 0.06        | 2.6E-04                                | 4.0E-06 | -0.13                                | 0.0003                             | 0.00003             | -0.02             | 0.08 |
| 47 | SC-OI                      | 0.78                            |                    | -2.74                      | 0.04        | 0.28                       | 0.07        | 3.2E-04                                | 6.0E-06 |                                      |                                    |                     |                   |      |
| 48 | SC-OI                      | 0.78                            |                    | -2.69                      | 0.04        | 0.25                       | 0.05        | 3.4E-04                                | 6.7E-06 |                                      |                                    |                     |                   |      |
| 49 | SC-OI                      | 0.78                            |                    | -2.71                      | 0.04        | 0.31                       | 0.06        | 3.3E-04                                | 5.5E-06 |                                      |                                    |                     |                   |      |
| 50 | SC-OI                      | 0.78                            |                    | -2.78                      | 0.05        | 0.30                       | 0.07        | 3.1E-04                                | 6.0E-06 |                                      |                                    |                     |                   |      |
| 51 | SC-OI                      | 0.78                            |                    | -2.74                      | 0.04        | 0.34                       | 0.08        | 3.3E-04                                | 6.7E-06 |                                      |                                    |                     |                   |      |
| 52 | SC-OI                      | 0.78                            |                    | -2.76                      | 0.04        | 0.41                       | 0.07        | 3.4E-04                                | 5.2E-06 |                                      |                                    |                     |                   |      |
| 53 | SC-OI                      | 0.78                            |                    | -2.75                      | 0.04        | 0.34                       | 0.08        | 3.2E-04                                | 1.1E-05 |                                      |                                    |                     |                   |      |
| 54 | SC-OI                      | 0.78                            |                    | -2.77                      | 0.04        | 0.34                       | 0.07        | 3.2E-04                                | 7.3E-06 |                                      |                                    |                     |                   |      |
|    | <b>Mean SC-OI bracket</b>  | <b>0.78</b>                     |                    | <b>-2.75</b>               | <b>0.05</b> | <b>0.32</b>                | <b>0.12</b> |                                        |         |                                      |                                    |                     |                   |      |
| 55 | Q19 ol (#7)                | 0.85                            | 99.2               | -1.55                      | 0.05        | 0.28                       | 0.06        | 1.2E-03                                | 5.1E-06 | -0.13                                | 0.0014                             | 0.00014             | -0.04             | 0.13 |
| 56 | Q19 ol (#8)                | 0.84                            | 99.2               | -1.77                      | 0.06        | 0.26                       | 0.07        | 1.2E-03                                | 6.7E-06 | -0.13                                | 0.0014                             | 0.00014             | -0.06             | 0.13 |
| 57 | Q35 ol (#7)                | 0.84                            | 98.2               | -1.98                      | 0.06        | 0.31                       | 0.07        | 2.8E-04                                | 4.4E-06 | -0.13                                | 0.0003                             | 0.00003             | -0.01             | 0.13 |
| 58 | Q35 ol (#6)                | 0.83                            | 99.2               | -1.98                      | 0.05        | 0.26                       | 0.05        | 2.9E-04                                | 4.6E-06 | -0.13                                | 0.0003                             | 0.00003             | -0.06             | 0.13 |
| 59 | Q36 ol (#5)                | 0.84                            | 97.5               | -2.04                      | 0.05        | 0.34                       | 0.07        | 1.2E-03                                | 7.8E-06 | -0.13                                | 0.0014                             | 0.00014             | 0.02              | 0.13 |
| 60 | Q36 ol (#8)                | 0.84                            | 97.5               | -1.93                      | 0.04        | 0.29                       | 0.05        | 2.0E-03                                | 7.3E-06 | -0.13                                | 0.0023                             | 0.00023             | -0.03             | 0.13 |
| 61 | SC-OI                      | 0.77                            |                    | -2.71                      | 0.04        | 0.29                       | 0.07        | 3.2E-04                                | 6.2E-06 |                                      |                                    |                     |                   |      |
| 62 | SC-OI                      | 0.78                            |                    | -2.73                      | 0.03        | 0.20                       | 0.06        | 3.4E-04                                | 4.9E-06 |                                      |                                    |                     |                   |      |
| 63 | SC-OI                      | 0.77                            |                    | -2.74                      | 0.04        | 0.30                       | 0.06        | 3.2E-04                                | 7.2E-06 |                                      |                                    |                     |                   |      |
| 64 | SC-OI                      | 0.78                            |                    | -2.79                      | 0.03        | 0.32                       | 0.06        | 3.5E-04                                | 7.4E-06 |                                      |                                    |                     |                   |      |
|    | <b>Mean SC-OI bracket</b>  | <b>0.78</b>                     |                    | <b>-2.76</b>               | <b>0.07</b> | <b>0.31</b>                | <b>0.11</b> |                                        |         |                                      |                                    |                     |                   |      |
| 65 | Q38 ol (#6)                | 0.81                            | 99.1               | -2.97                      | 0.05        | 0.31                       | 0.05        | 4.9E-04                                | 5.5E-06 | -0.13                                | 0.0006                             | 0.00006             | -0.01             | 0.12 |
| 66 | Q38 ol (#7)                | 0.81                            | 99.1               | -3.07                      | 0.05        | 0.44                       | 0.04        | 3.1E-04                                | 3.9E-06 | -0.13                                | 0.0004                             | 0.00004             | 0.13              | 0.12 |
| 71 | SC-OI                      | 0.78                            |                    | -2.76                      | 0.03        | 0.36                       | 0.05        | 3.1E-04                                | 8.4E-06 |                                      |                                    |                     |                   |      |
| 72 | SC-OI                      | 0.78                            |                    | -2.80                      | 0.03        | 0.38                       | 0.07        | 3.2E-04                                | 8.3E-06 |                                      |                                    |                     |                   |      |
| 73 | SC-OI                      | 0.78                            |                    | -2.76                      | 0.04        | 0.31                       | 0.07        | 3.1E-04                                | 5.2E-06 |                                      |                                    |                     |                   |      |
| 74 | SC-OI                      | 0.78                            |                    | -2.79                      | 0.03        | 0.33                       | 0.06        | 3.2E-04                                | 8.3E-06 |                                      |                                    |                     |                   |      |

Table EA3-1 (continued)

| #   | Description (# in Table 2)  | <sup>24</sup> Mg yield (cps/nA) | chondrule Fo or En | measured raw values        |             |                            |             |                                        | $\delta^{25}\text{Mg}$ ( $\pm 2\%$ ) | Corrected data |                                    |                     |                   |      |
|-----|-----------------------------|---------------------------------|--------------------|----------------------------|-------------|----------------------------|-------------|----------------------------------------|--------------------------------------|----------------|------------------------------------|---------------------|-------------------|------|
|     |                             |                                 |                    | $\delta^{25}\text{Mg}_m$ ‰ | 2SE/2SD     | $\Delta^{26}\text{Mg}_m$ ‰ | 2SE/2SD     | <sup>27</sup> Al/ <sup>24</sup> Mg Raw |                                      | 2SE %          | <sup>27</sup> Al/ <sup>24</sup> Mg | unc. ( $\pm 10\%$ ) | $d^{26}\text{Mg}$ | 2SE  |
| 75  | Sp79-11 En                  | 0.67                            |                    | -0.11                      | 0.06        | 0.33                       | 0.07        | 3.2E-02                                | 9.6E-05                              |                |                                    |                     |                   |      |
| 76  | Sp79-11 En                  | 0.67                            |                    | -0.10                      | 0.05        | 0.44                       | 0.07        | 3.4E-02                                | 9.0E-05                              |                |                                    |                     |                   |      |
| 77  | Sp79-11 En                  | 0.67                            |                    | -0.13                      | 0.04        | 0.35                       | 0.08        | 3.7E-02                                | 1.0E-04                              |                |                                    |                     |                   |      |
| 78  | Sp79-11 En                  | 0.67                            |                    | -0.11                      | 0.04        | 0.28                       | 0.08        | 3.5E-02                                | 9.5E-05                              |                |                                    |                     |                   |      |
|     | <b>Mean Sp79-11 bracket</b> | <b>0.67</b>                     |                    | <b>-0.11</b>               | <b>0.06</b> | <b>0.35</b>                | <b>0.10</b> |                                        |                                      |                |                                    |                     |                   |      |
| 86  | M3 lpx (#6)                 | 0.67                            | 91.4               | 1.44                       | 0.05        | 0.34                       | 0.06        | 4.0E-02                                | 7.5E-05                              | -0.13          | 0.0466                             | 0.00466             | -0.01             | 0.10 |
| 87  | M3 lpx (#8)                 | 0.68                            | 91.4               | 1.49                       | 0.06        | 0.39                       | 0.06        | 3.8E-02                                | 5.8E-05                              | -0.13          | 0.0439                             | 0.00439             | 0.04              | 0.10 |
| 88  | M3 lpx (#7)                 | 0.68                            | 91.4               | 1.20                       | 0.06        | 0.40                       | 0.07        | 2.5E-02                                | 6.0E-05                              | -0.13          | 0.0287                             | 0.00287             | 0.05              | 0.10 |
| 89  | Sp79-11 En                  | 0.67                            |                    | -0.17                      | 0.05        | 0.33                       | 0.07        | 3.3E-02                                | 7.7E-05                              |                |                                    |                     |                   |      |
| 90  | Sp79-11 En                  | 0.67                            |                    | -0.07                      | 0.06        | 0.34                       | 0.06        | 3.4E-02                                | 9.4E-05                              |                |                                    |                     |                   |      |
| 91  | Sp79-11 En                  | 0.67                            |                    | -0.09                      | 0.05        | 0.32                       | 0.08        | 3.8E-02                                | 9.9E-05                              |                |                                    |                     |                   |      |
| 92  | Sp79-11 En                  | 0.67                            |                    | -0.12                      | 0.05        | 0.39                       | 0.07        | 3.6E-02                                | 6.7E-05                              |                |                                    |                     |                   |      |
|     | <b>Mean Sp79-11 bracket</b> | <b>0.67</b>                     |                    | <b>-0.14</b>               | <b>0.11</b> | <b>0.33</b>                | <b>0.07</b> |                                        |                                      |                |                                    |                     |                   |      |
| 93  | M6 lpx (#9)                 | 0.70                            | 98.1               | 0.04                       | 0.05        | 0.36                       | 0.06        | 2.3E-02                                | 5.4E-05                              | -0.13          | 0.0265                             | 0.00265             | 0.03              | 0.07 |
| 94  | M6 lpx (#8)                 | 0.70                            | 98.1               | 0.22                       | 0.05        | 0.37                       | 0.08        | 1.4E-02                                | 3.7E-05                              | -0.13          | 0.0163                             | 0.00163             | 0.04              | 0.08 |
| 101 | Q13 lpx (#7)                | 0.68                            | 95.4               | 0.86                       | 0.05        | 0.38                       | 0.06        | 2.4E-02                                | 9.8E-05                              | -0.13          | 0.0281                             | 0.00281             | 0.05              | 0.07 |
| 102 | Q13 lpx (#8)                | 0.68                            | 95.4               | 1.02                       | 0.05        | 0.38                       | 0.07        | 3.0E-02                                | 7.0E-05                              | -0.13          | 0.0341                             | 0.00341             | 0.06              | 0.07 |
| 104 | Q7 lpx (#8)                 | 0.70                            | 97.8               | 0.31                       | 0.06        | 0.38                       | 0.06        | 2.6E-02                                | 9.4E-05                              | -0.13          | 0.0298                             | 0.00298             | 0.05              | 0.07 |
| 105 | Q7 lpx (#7)                 | 0.69                            | 97.8               | 0.29                       | 0.04        | 0.35                       | 0.06        | 2.0E-02                                | 6.4E-05                              | -0.13          | 0.0230                             | 0.00230             | 0.02              | 0.07 |
| 106 | Sp79-11 En                  | 0.66                            |                    | -0.11                      | 0.04        | 0.29                       | 0.07        | 3.7E-02                                | 8.1E-05                              |                |                                    |                     |                   |      |
| 107 | Sp79-11 En                  | 0.66                            |                    | -0.14                      | 0.05        | 0.31                       | 0.07        | 3.3E-02                                | 1.2E-04                              |                |                                    |                     |                   |      |
| 108 | Sp79-11 En                  | 0.66                            |                    | -0.21                      | 0.06        | 0.36                       | 0.08        | 3.6E-02                                | 8.5E-05                              |                |                                    |                     |                   |      |
| 109 | Sp79-11 En                  | 0.67                            |                    | -0.22                      | 0.05        | 0.30                       | 0.05        | 3.4E-02                                | 8.6E-05                              |                |                                    |                     |                   |      |
| 112 | Sp79-11 En                  | 0.65                            |                    | -0.16                      | 0.03        | 0.36                       | 0.06        | 3.7E-02                                | 1.1E-04                              |                |                                    |                     |                   |      |
| 113 | Sp79-11 En                  | 0.67                            |                    | -0.23                      | 0.04        | 0.33                       | 0.06        | 3.4E-02                                | 6.0E-05                              |                |                                    |                     |                   |      |
| 114 | Sp79-11 En                  | 0.67                            |                    | -0.13                      | 0.04        | 0.38                       | 0.06        | 3.7E-02                                | 9.7E-05                              |                |                                    |                     |                   |      |
| 115 | Sp79-11 En                  | 0.67                            |                    | -0.13                      | 0.05        | 0.35                       | 0.06        | 3.5E-02                                | 8.6E-05                              |                |                                    |                     |                   |      |
|     | <b>Mean Sp79-11 bracket</b> | <b>0.67</b>                     |                    | <b>-0.17</b>               | <b>0.09</b> | <b>0.36</b>                | <b>0.06</b> |                                        |                                      |                |                                    |                     |                   |      |
| 118 | Q15 lpx (#6)                | 0.71                            | 97.7               | 0.37                       | 0.04        | 0.38                       | 0.06        | 1.3E-02                                | 3.2E-05                              | -0.13          | 0.0149                             | 0.00149             | 0.02              | 0.07 |
| 119 | Q15 lpx (#7)                | 0.71                            | 97.7               | 0.85                       | 0.04        | 0.34                       | 0.05        | 2.4E-02                                | 3.4E-05                              | -0.13          | 0.0276                             | 0.00276             | -0.01             | 0.06 |
| 120 | Q16 lpx (#9)                | 0.70                            | 98.1               | 0.43                       | 0.05        | 0.35                       | 0.06        | 1.4E-02                                | 4.9E-05                              | -0.13          | 0.0166                             | 0.00166             | 0.00              | 0.06 |
| 121 | Q16 lpx (#8)                | 0.70                            | 98.1               | 0.43                       | 0.04        | 0.40                       | 0.05        | 2.5E-02                                | 3.7E-05                              | -0.13          | 0.0286                             | 0.00286             | 0.04              | 0.06 |
| 122 | Q19 lpx (#10)               | 0.71                            | 97.3               | 0.41                       | 0.05        | 0.36                       | 0.07        | 2.0E-02                                | 6.3E-05                              | -0.13          | 0.0234                             | 0.00234             | 0.00              | 0.07 |
| 123 | Q19 lpx (#9)                | 0.71                            | 97.3               | 0.46                       | 0.04        | 0.36                       | 0.04        | 1.5E-02                                | 1.3E-04                              | -0.13          | 0.0175                             | 0.00175             | 0.01              | 0.06 |
| 124 | Sp79-11 En                  | 0.67                            |                    | -0.14                      | 0.04        | 0.32                       | 0.05        | 3.6E-02                                | 8.1E-05                              |                |                                    |                     |                   |      |
| 125 | Sp79-11 En                  | 0.67                            |                    | -0.12                      | 0.04        | 0.33                       | 0.07        | 3.4E-02                                | 8.2E-05                              |                |                                    |                     |                   |      |
| 126 | Sp79-11 En                  | 0.67                            |                    | -0.20                      | 0.05        | 0.41                       | 0.06        | 3.6E-02                                | 7.8E-05                              |                |                                    |                     |                   |      |
| 127 | Sp79-11 En                  | 0.67                            |                    | -0.22                      | 0.04        | 0.37                       | 0.05        | 3.5E-02                                | 9.0E-05                              |                |                                    |                     |                   |      |
|     | <b>Mean Sp79-11 bracket</b> | <b>0.67</b>                     |                    | <b>-0.17</b>               | <b>0.08</b> | <b>0.35</b>                | <b>0.06</b> |                                        |                                      |                |                                    |                     |                   |      |
| 128 | Q35 lpx (#8)                | 0.67                            | 89.8               | 1.01                       | 0.05        | 0.31                       | 0.06        | 6.4E-02                                | 1.4E-04                              | -0.13          | 0.0742                             | 0.00742             | -0.04             | 0.06 |
| 129 | Q36 lpx (#6)                | 0.70                            | 96.7               | 0.82                       | 0.04        | 0.33                       | 0.05        | 2.1E-02                                | 2.1E-04                              | -0.13          | 0.0238                             | 0.00238             | -0.02             | 0.06 |
| 130 | Q36 lpx (#7)                | 0.71                            | 96.7               | 0.41                       | 0.04        | 0.36                       | 0.05        | 1.2E-02                                | 1.1E-04                              | -0.13          | 0.0139                             | 0.00139             | 0.01              | 0.06 |
| 131 | Q38 lpx (#8)                | 0.70                            | 98.0               | -0.24                      | 0.04        | 0.30                       | 0.06        | 1.6E-02                                | 4.1E-05                              | -0.13          | 0.0189                             | 0.00189             | -0.05             | 0.07 |
| 132 | Q38 lpx (#9)                | 0.69                            | 98.0               | -0.15                      | 0.05        | 0.29                       | 0.06        | 2.7E-02                                | 4.9E-05                              | -0.13          | 0.0317                             | 0.00317             | -0.06             | 0.06 |
| 133 | Q44 lpx (#6)                | 0.70                            | 97.5               | 0.86                       | 0.05        | 0.34                       | 0.06        | 2.0E-02                                | 5.2E-05                              | -0.13          | 0.0230                             | 0.00230             | 0.00              | 0.06 |
| 134 | Q44 lpx (#8)                | 0.69                            | 97.5               | 1.12                       | 0.04        | 0.36                       | 0.05        | 2.1E-02                                | 4.1E-05                              | -0.13          | 0.0239                             | 0.00239             | 0.01              | 0.06 |
| 135 | Q44 lpx (#7)                | 0.71                            | 97.5               | 1.29                       | 0.04        | 0.39                       | 0.06        | 2.4E-02                                | 5.3E-05                              | -0.13          | 0.0277                             | 0.00277             | 0.05              | 0.06 |
| 136 | Sp79-11 En                  | 0.67                            |                    | -0.13                      | 0.04        | 0.32                       | 0.05        | 3.3E-02                                | 6.4E-05                              |                |                                    |                     |                   |      |
| 137 | Sp79-11 En                  | 0.67                            |                    | -0.16                      | 0.05        | 0.35                       | 0.07        | 3.5E-02                                | 8.1E-05                              |                |                                    |                     |                   |      |
| 138 | Sp79-11 En                  | 0.67                            |                    | -0.20                      | 0.04        | 0.34                       | 0.06        | 3.7E-02                                | 8.5E-05                              |                |                                    |                     |                   |      |
| 139 | Sp79-11 En                  | 0.66                            |                    | -0.21                      | 0.04        | 0.36                       | 0.05        | 3.5E-02                                | 5.9E-05                              |                |                                    |                     |                   |      |

|                                                                                                                   |        |        |
|-------------------------------------------------------------------------------------------------------------------|--------|--------|
| Raw Mean <sup>27</sup> Al/ <sup>24</sup> Mg of Sp79-11 (Ref. value: 0.0405; Lamb and Valley, 1988) and 2SD:       | 0.0352 | 0.0032 |
| RSF <sup>27</sup> Al/ <sup>24</sup> Mg <sub>Raw</sub> / <sup>27</sup> Al/ <sup>24</sup> Mg <sub>Reference</sub> : | 0.869  |        |

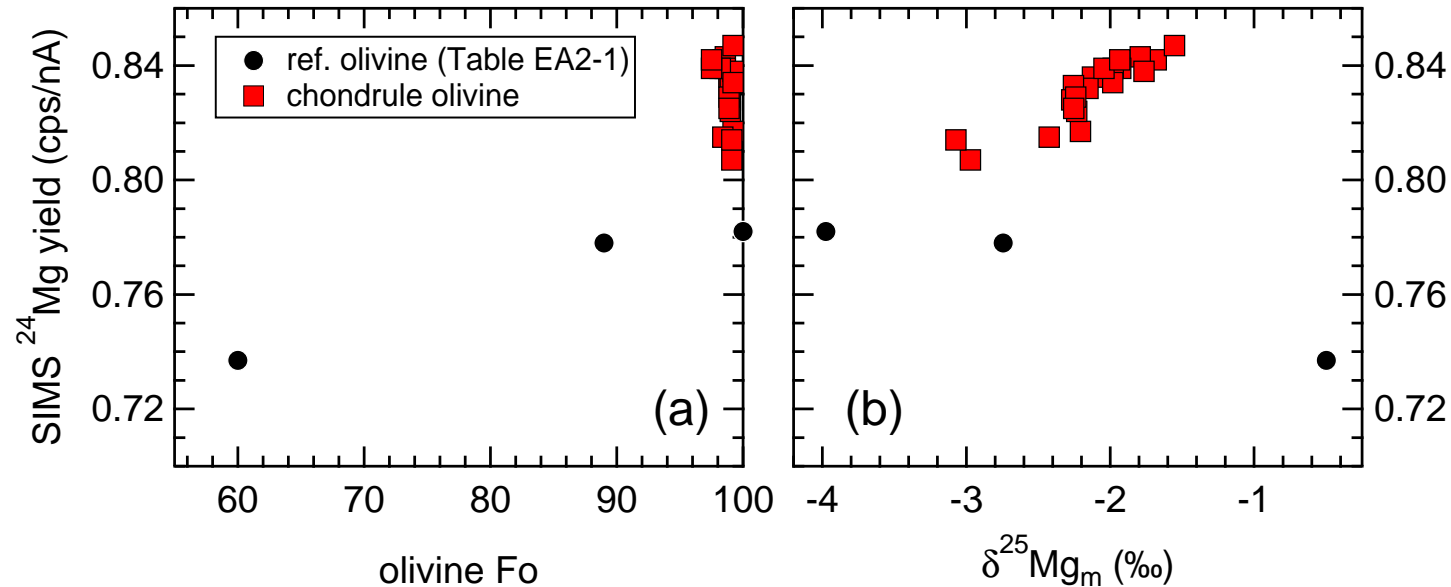

Fig. EA3-1. Reference and chondrule olivine SIMS yields versus Fo and raw  $\delta^{25}\text{Mg}$ .

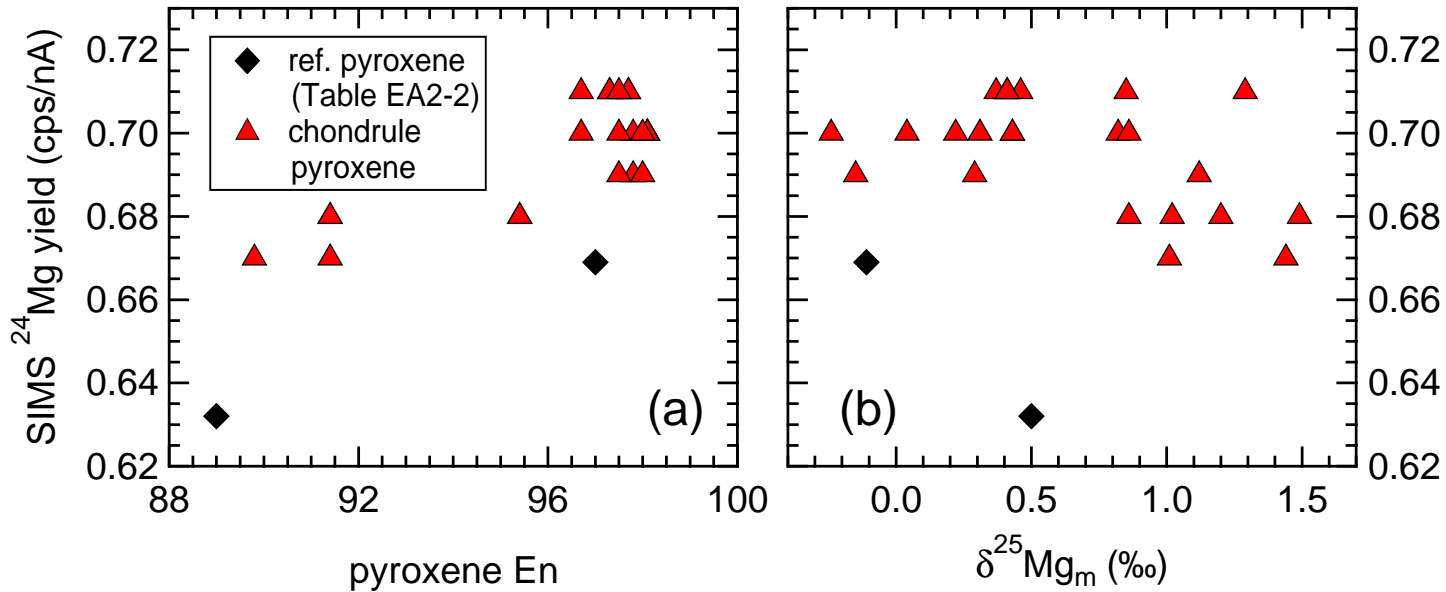

Fig. EA3-2. Reference and chondrule pyroxene SIMS yields versus En and raw  $\delta^{25}\text{Mg}$ .
