# Supplementary material
Source: PubMed Central journal article supplement (PMC7121246)

**EA5.** Examples of plagioclase Raman spectra for each chondrule measured by Al-Mg isotope systematics. Shown in each plot are characteristic anorthite peaks as given by Table 2 of Matson et al. (1986).

**Q7**

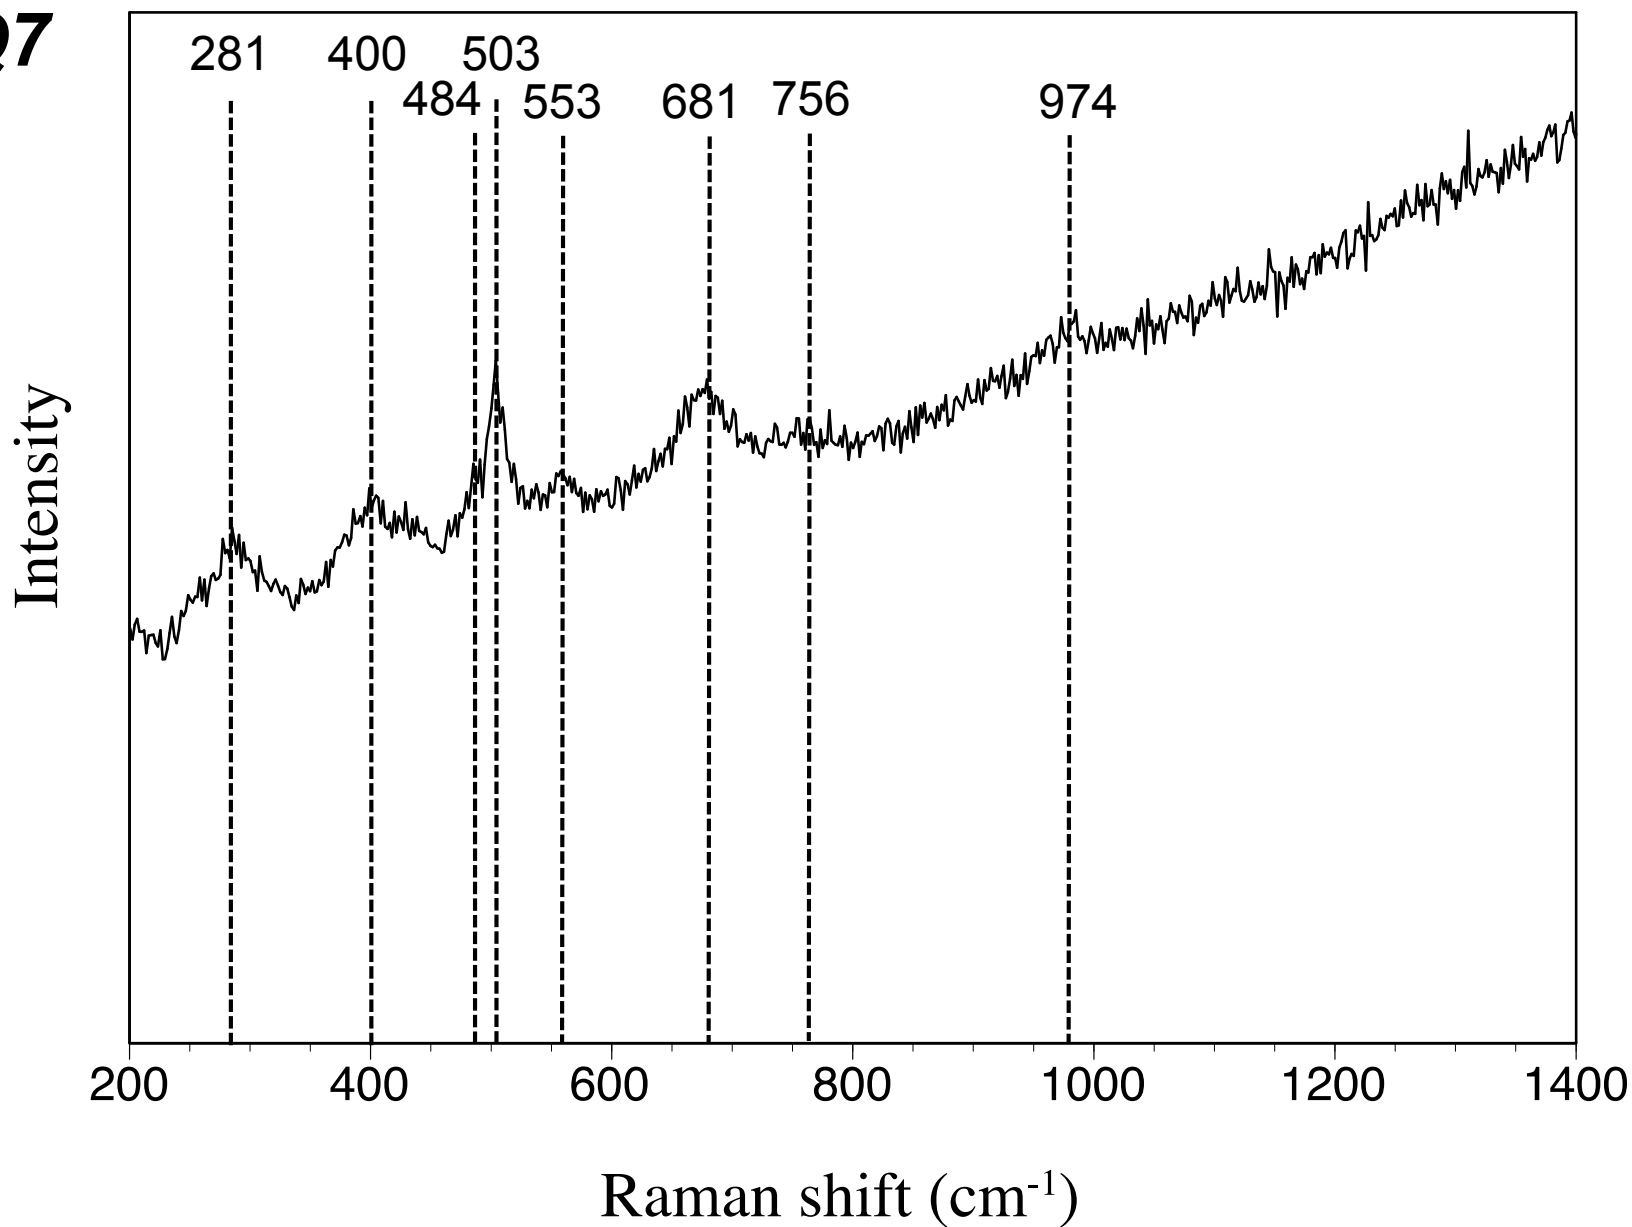

**Q13**

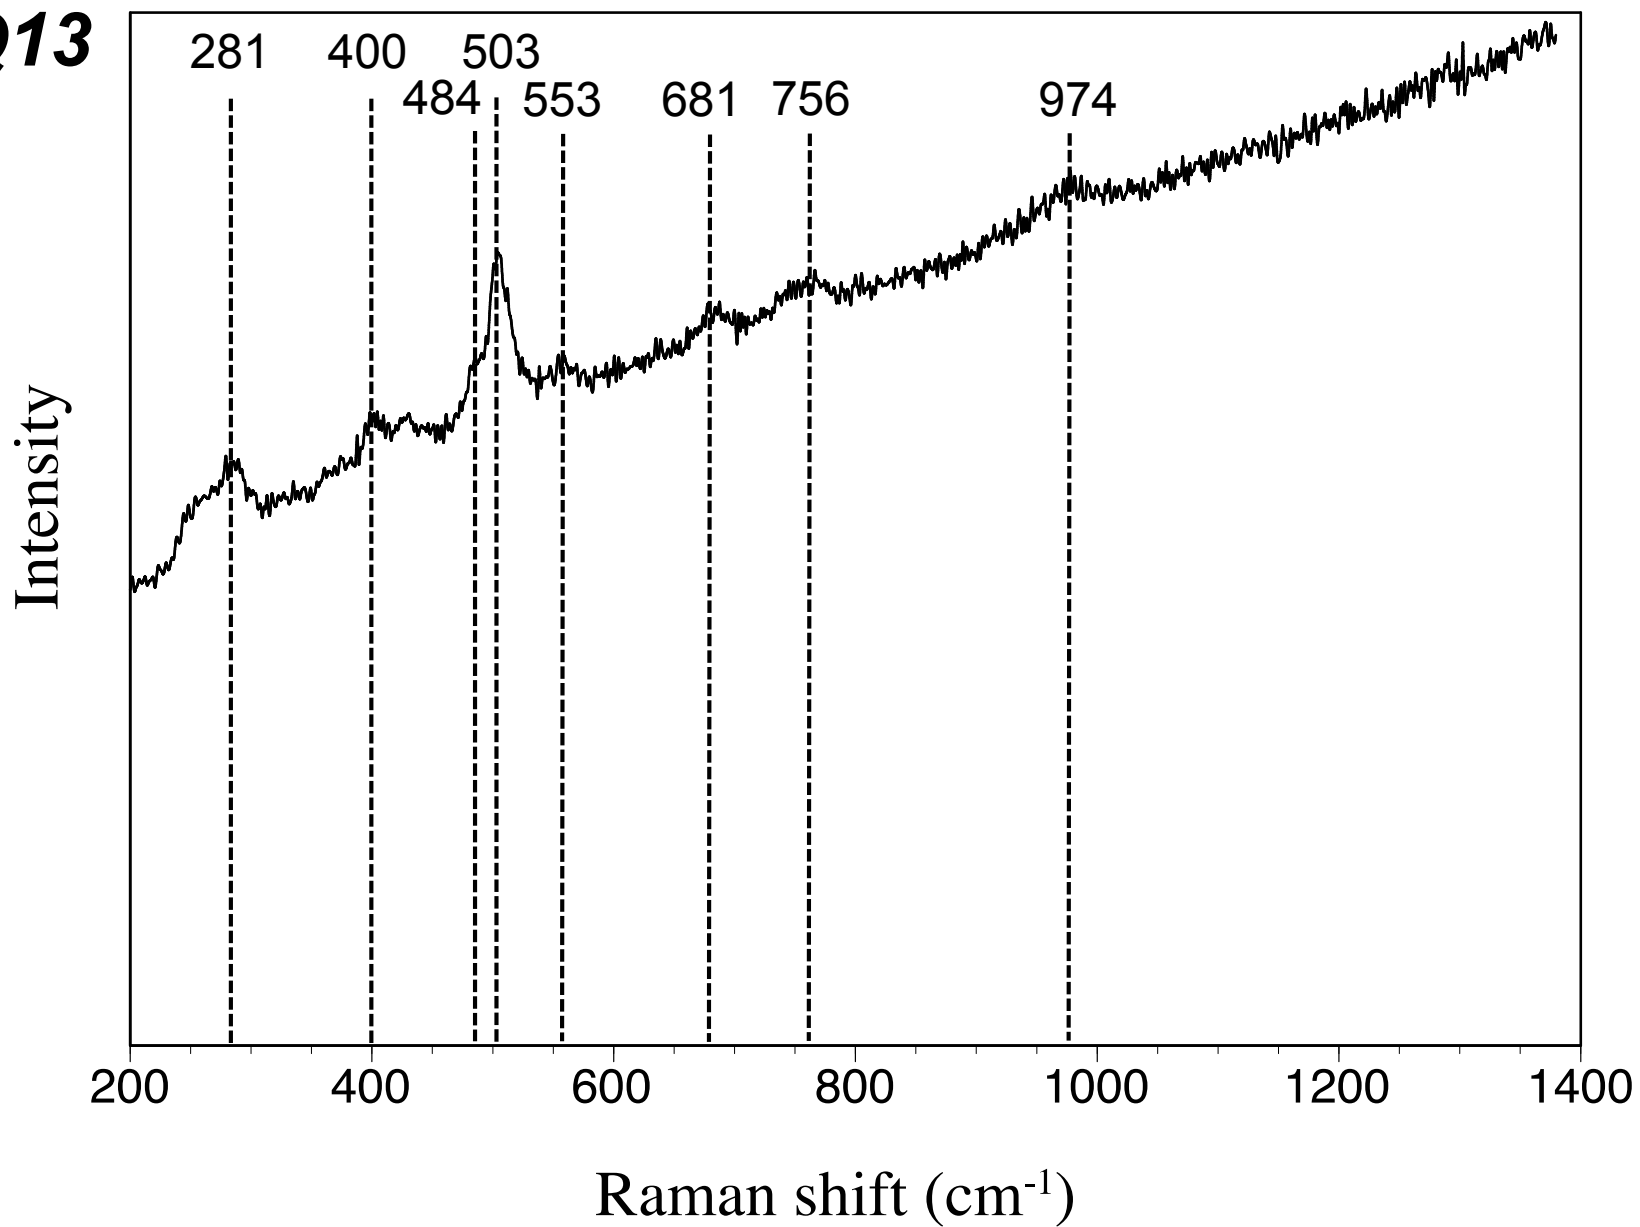

**Q15**

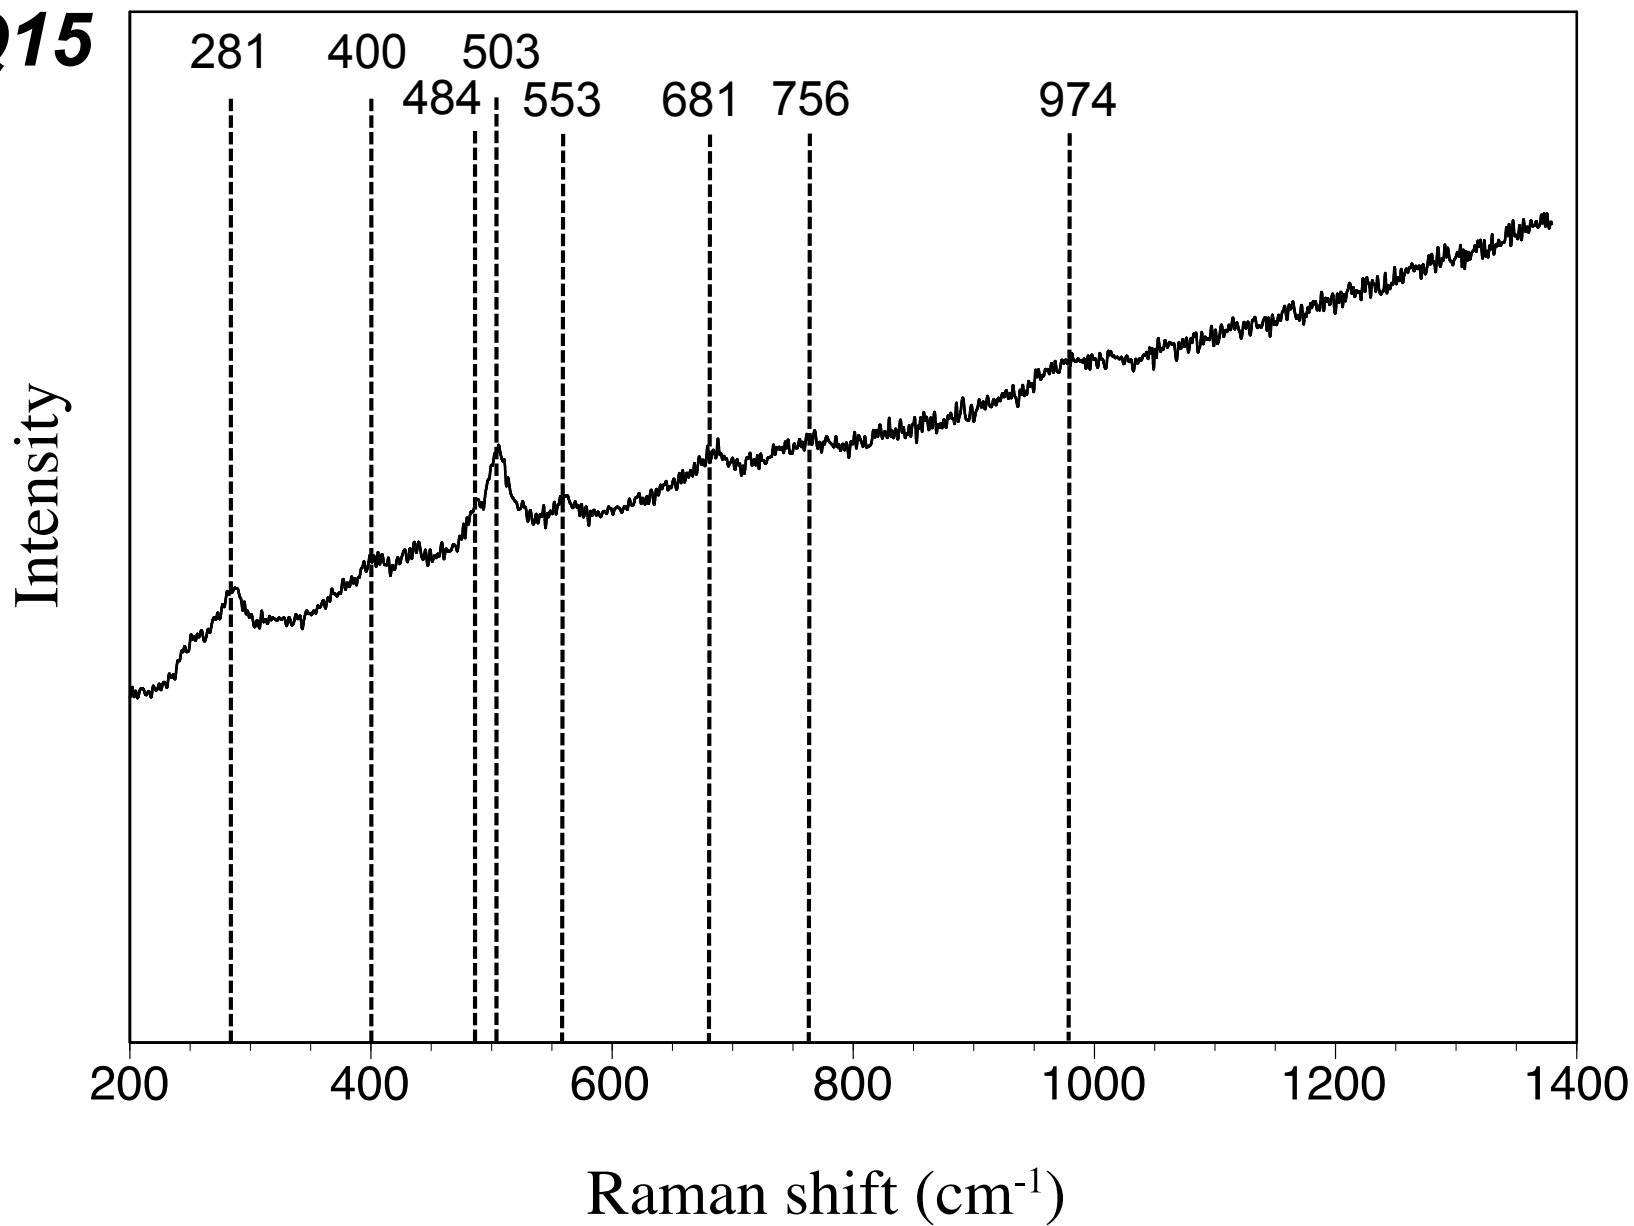

**Q16**

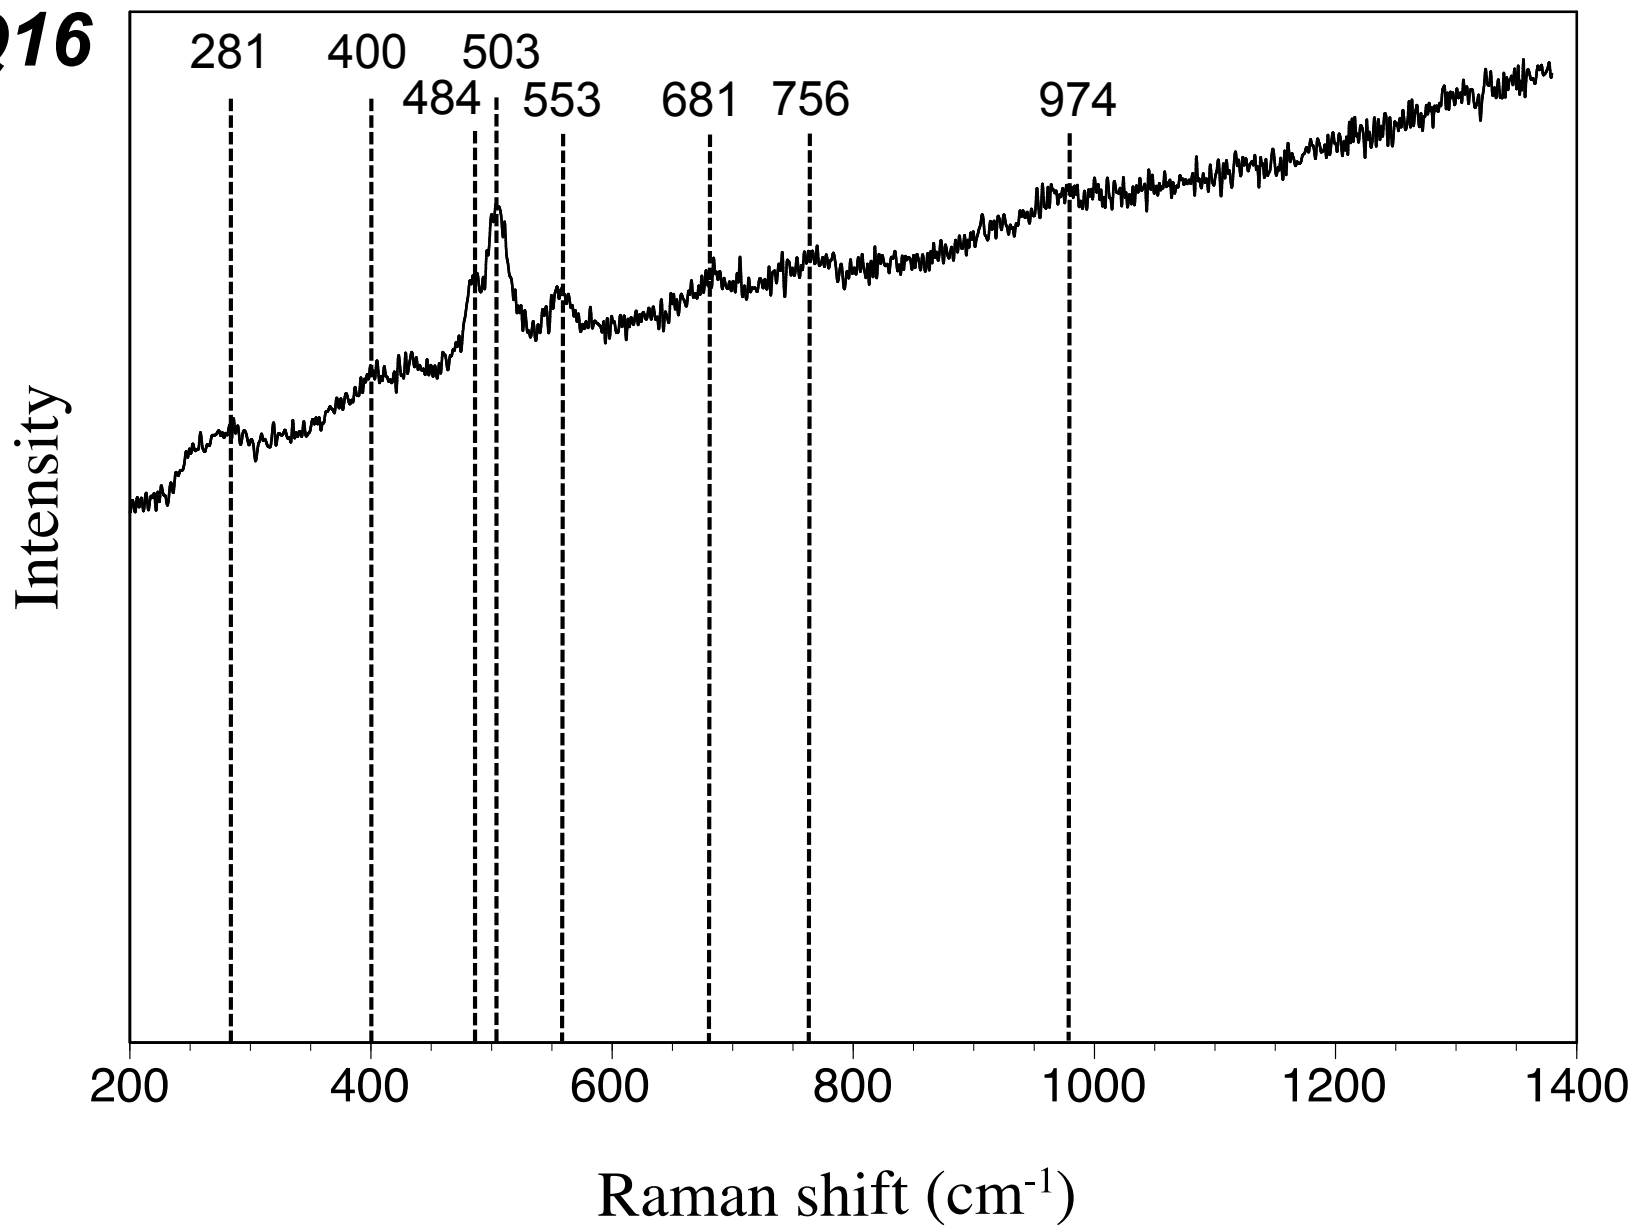

**Q19**

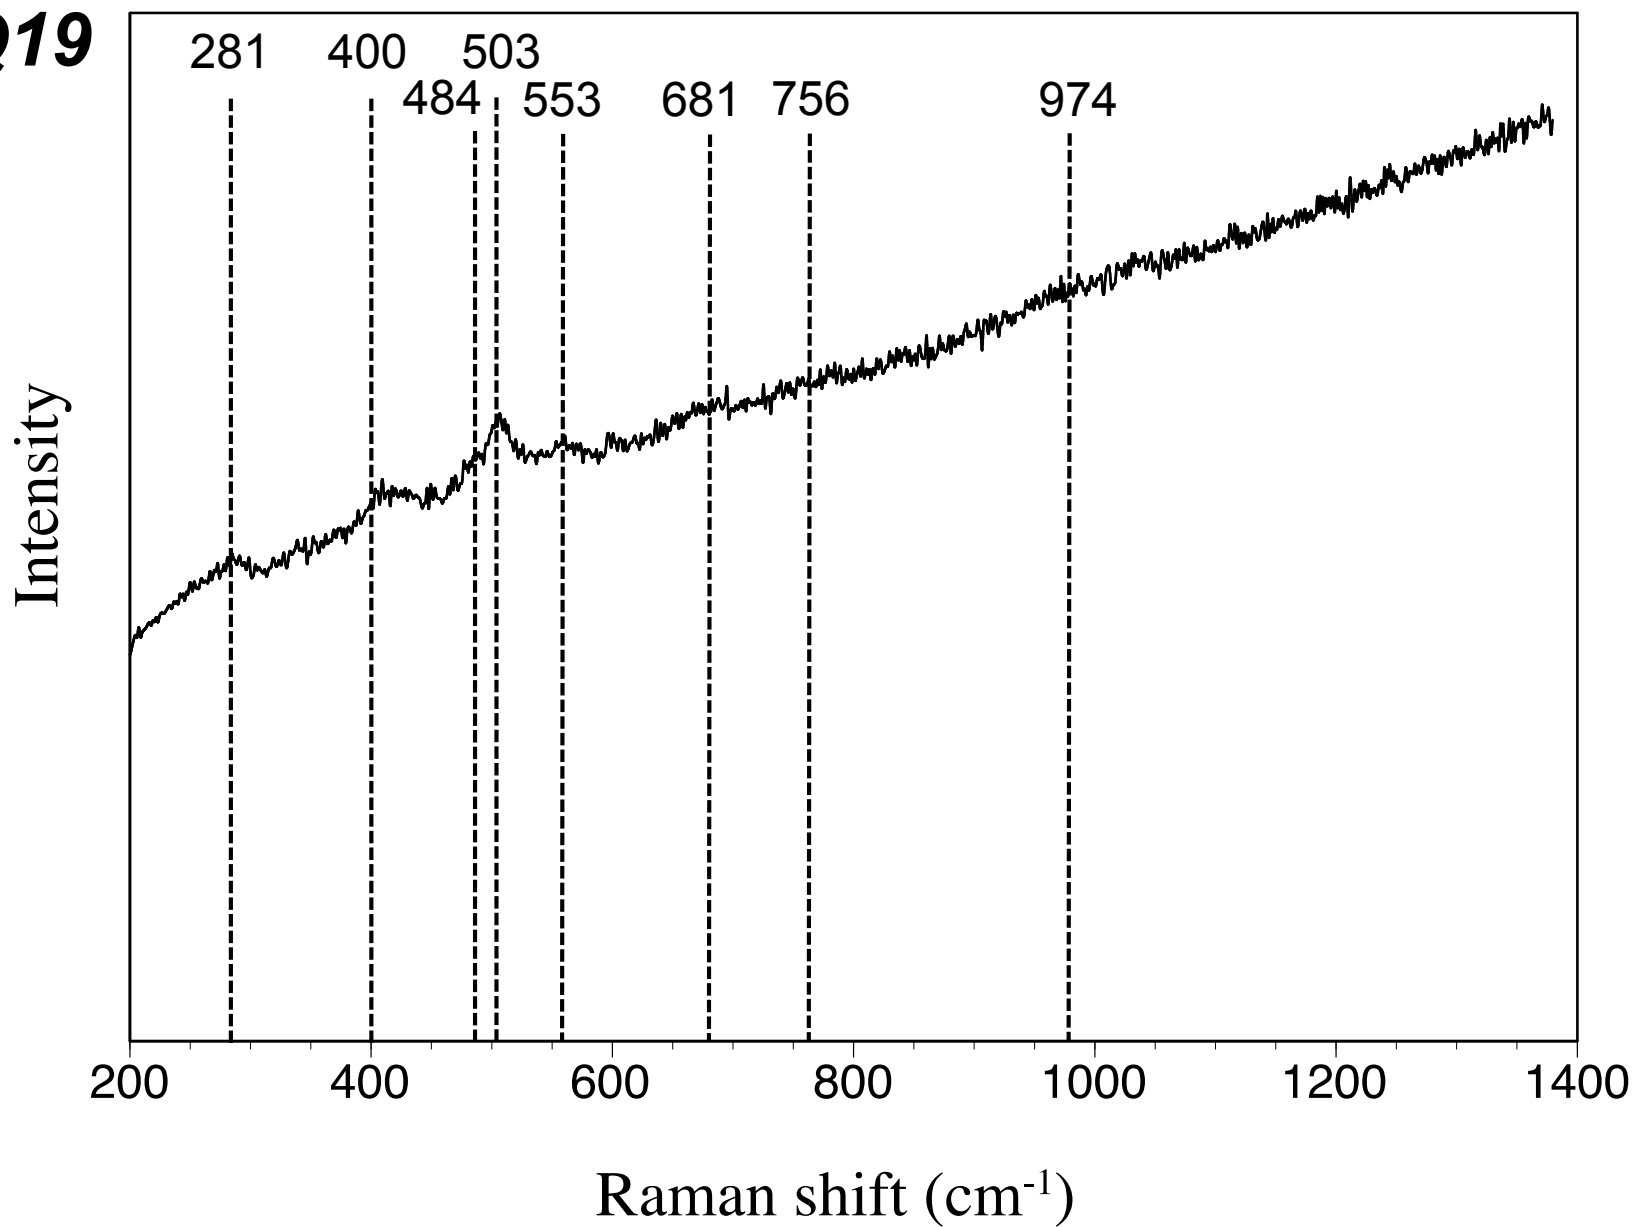

**Q35**

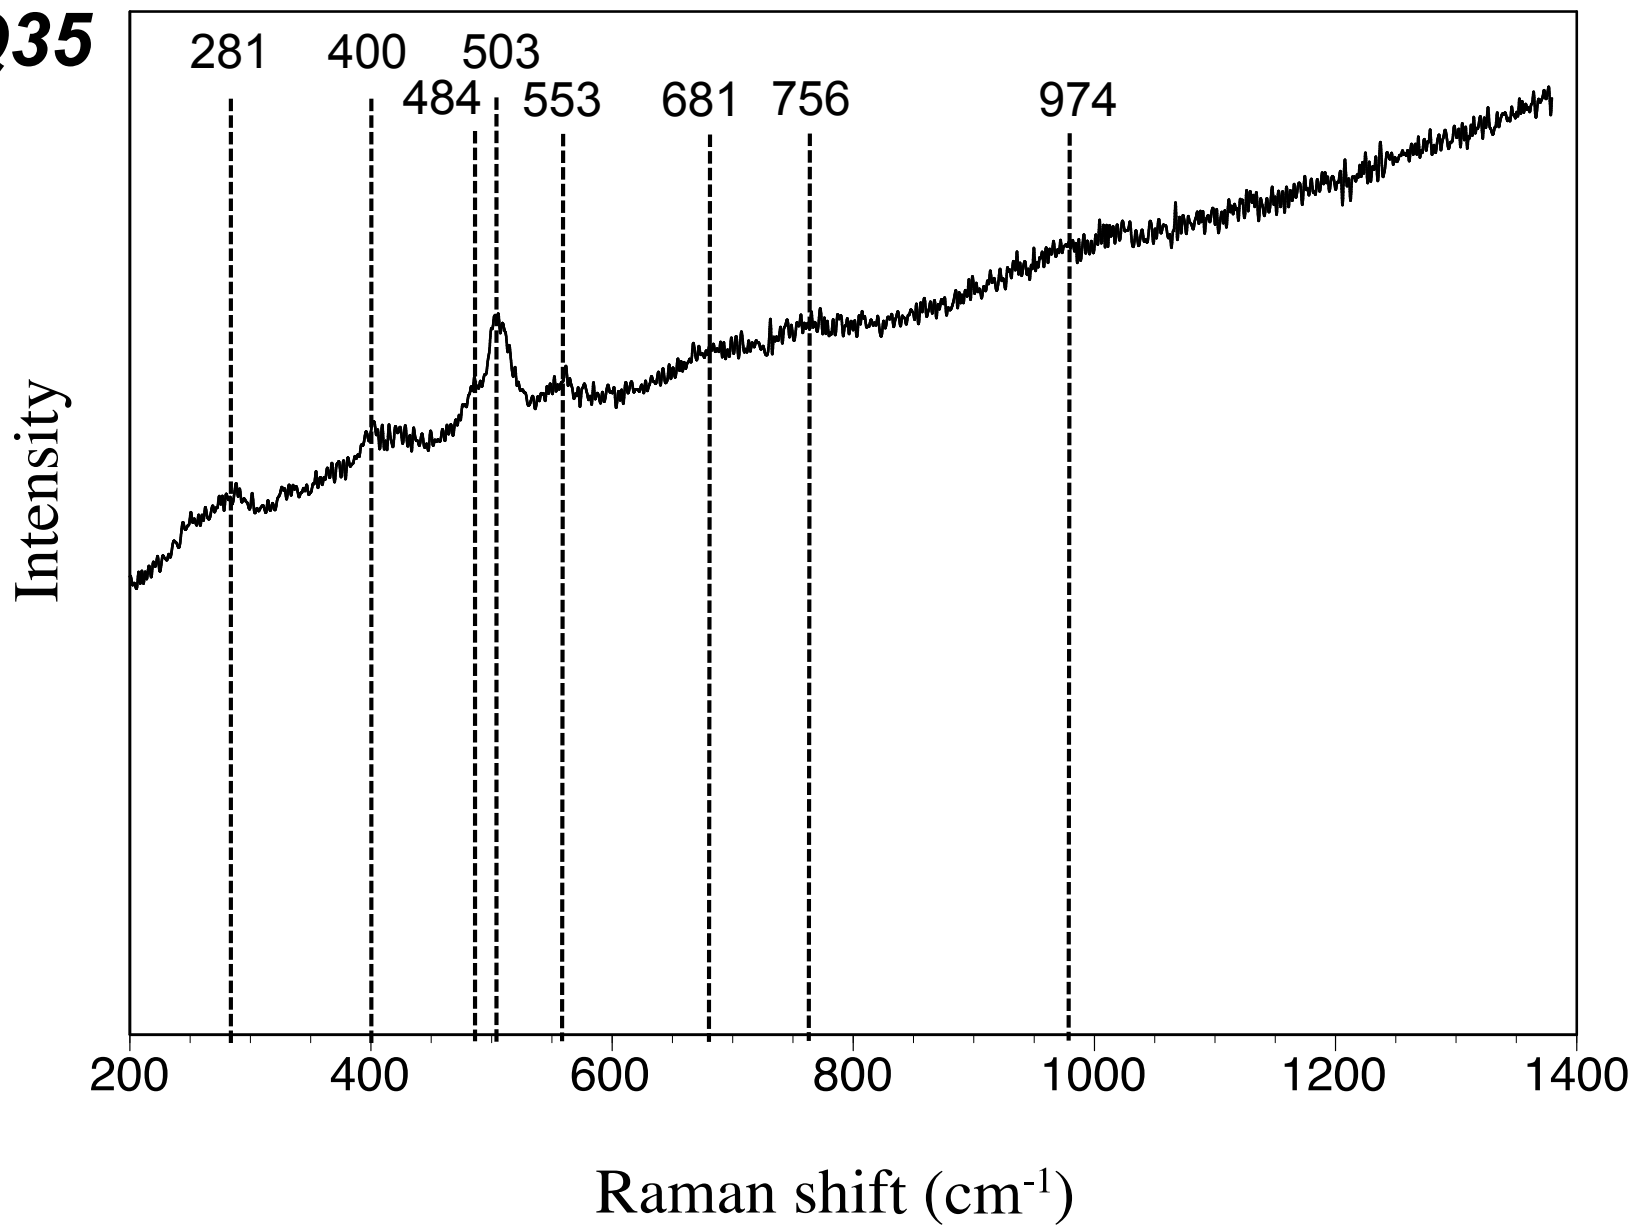

**Q36**

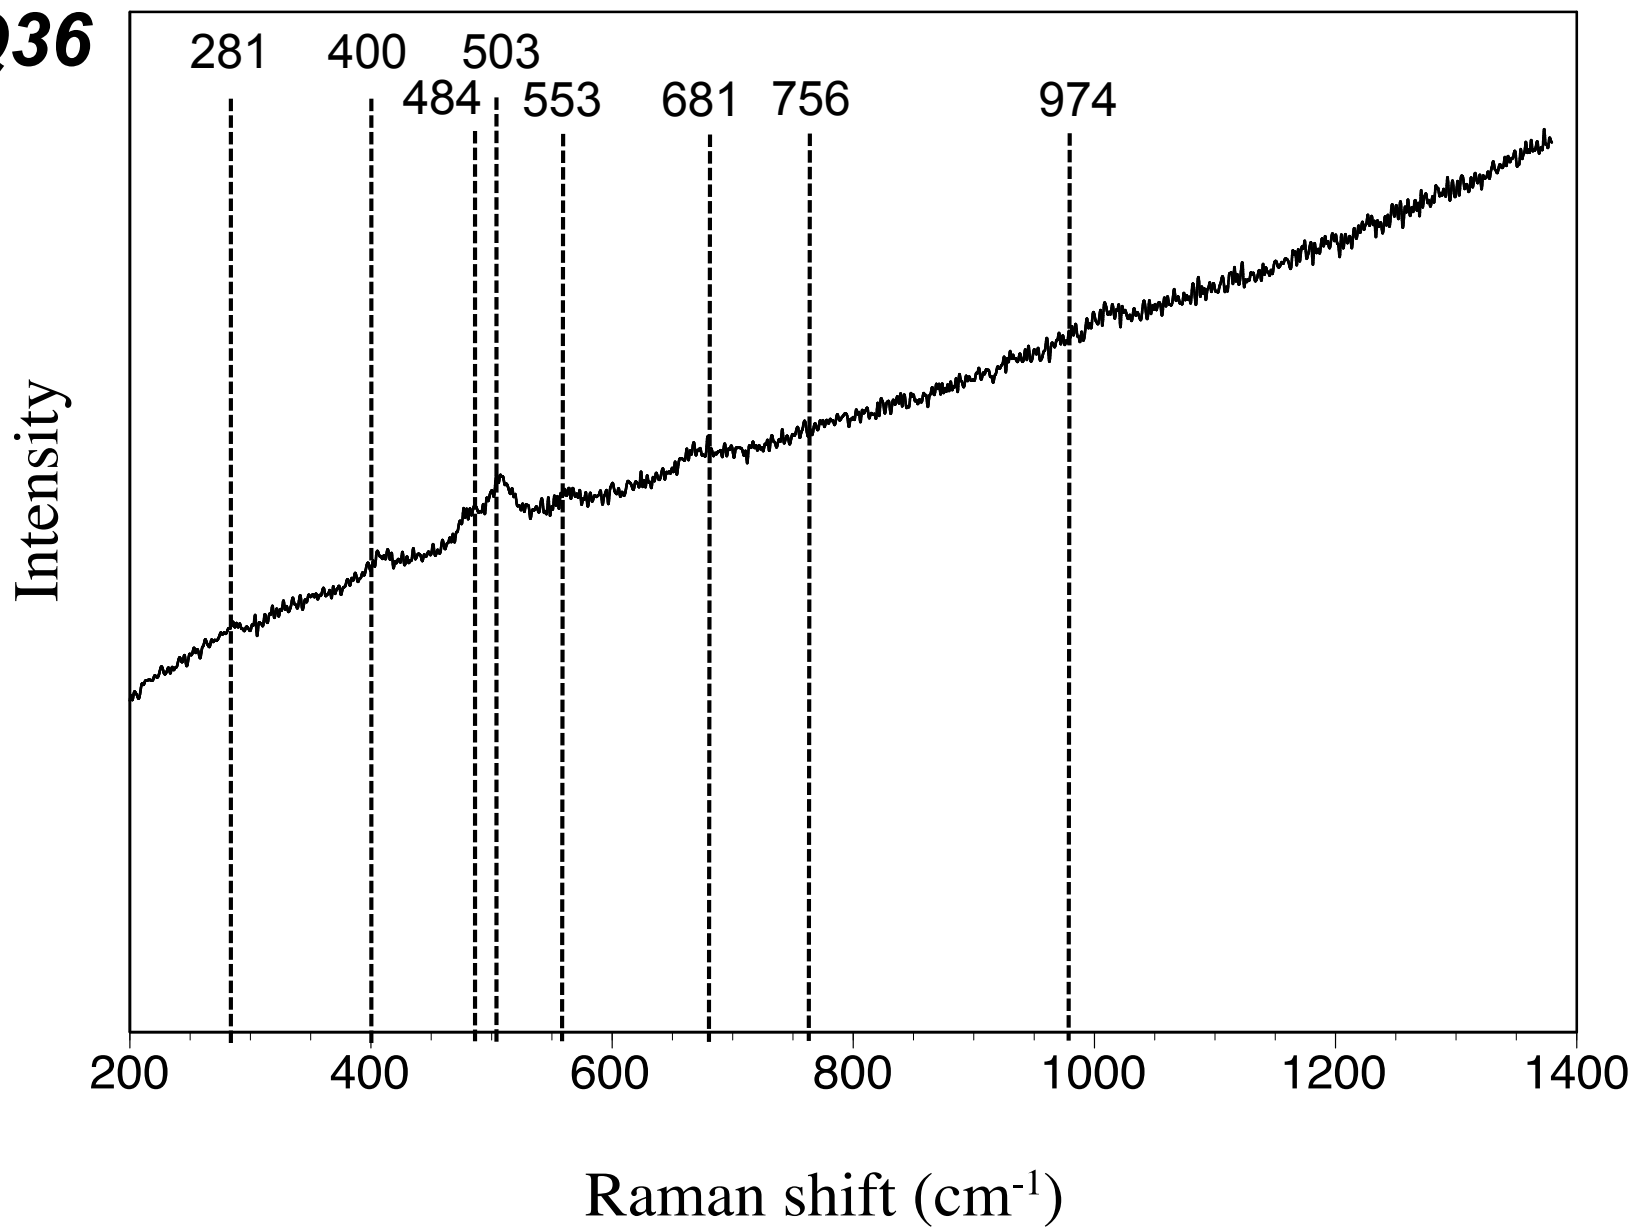



**Q38**

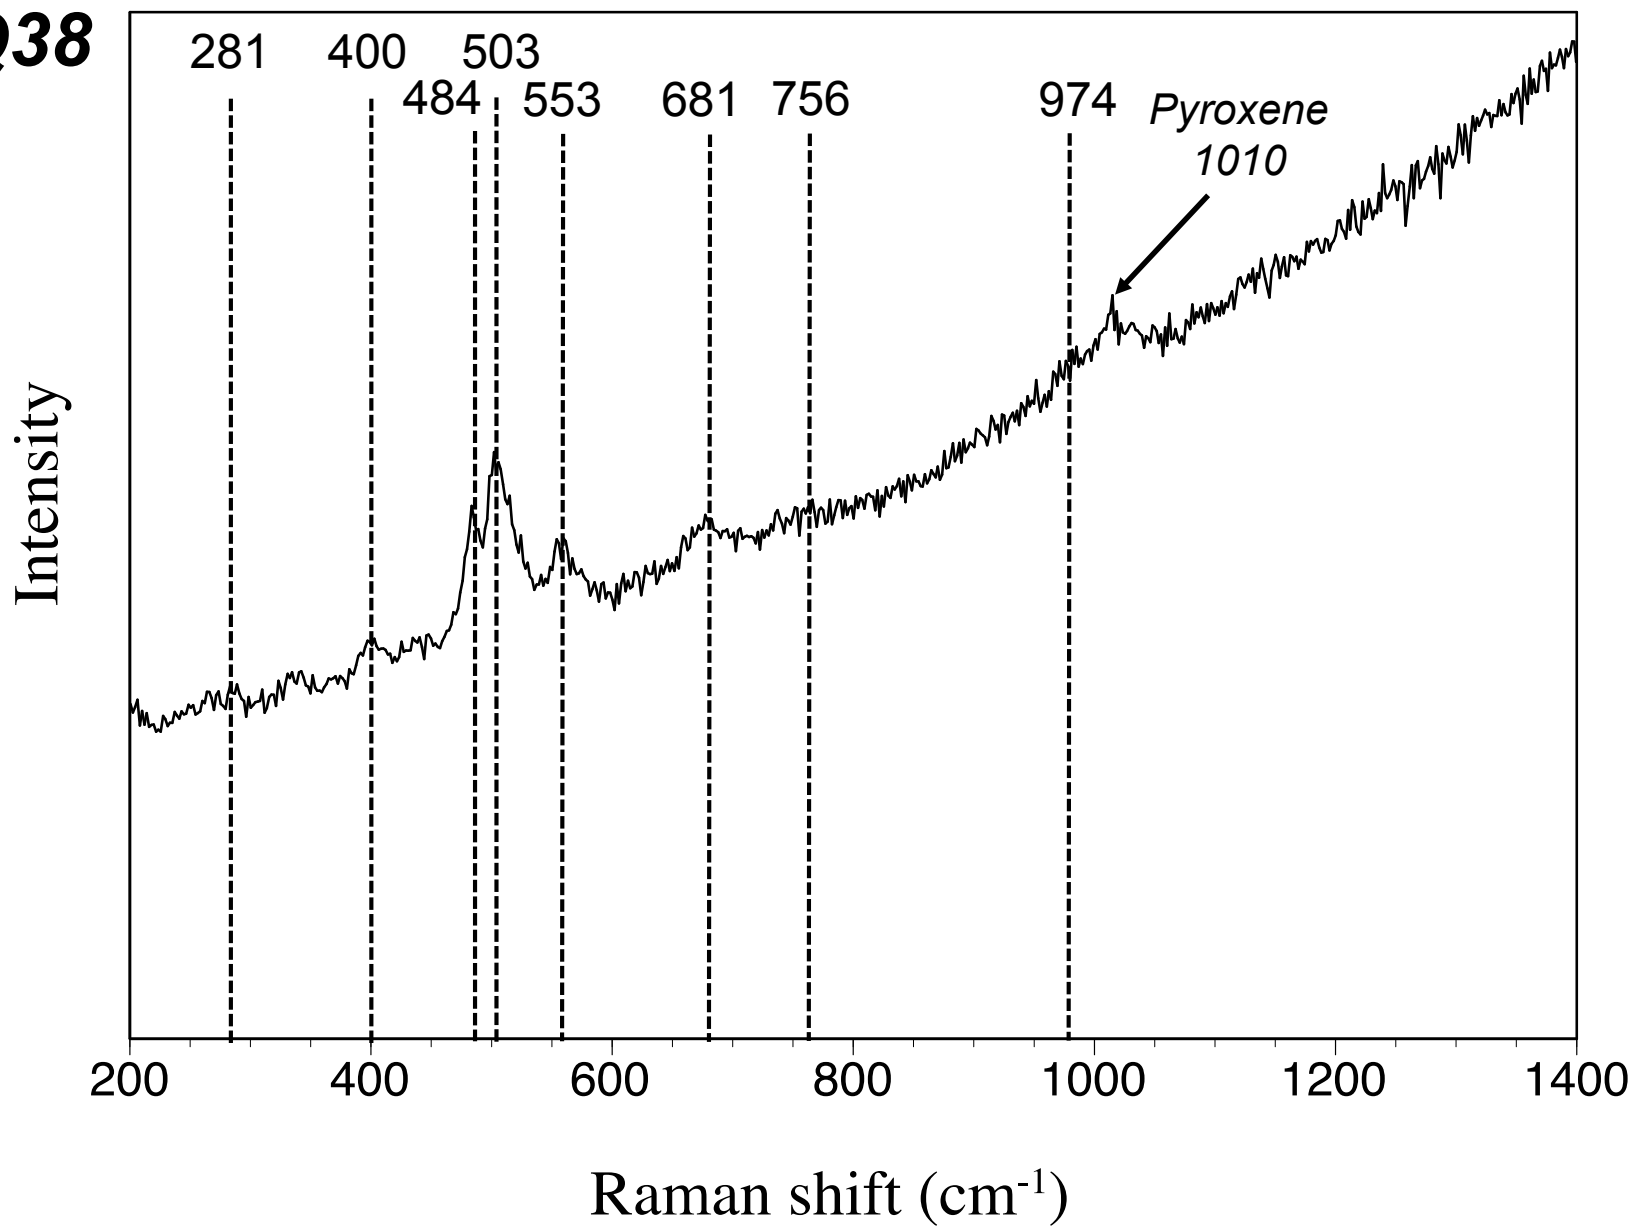

**Q44**

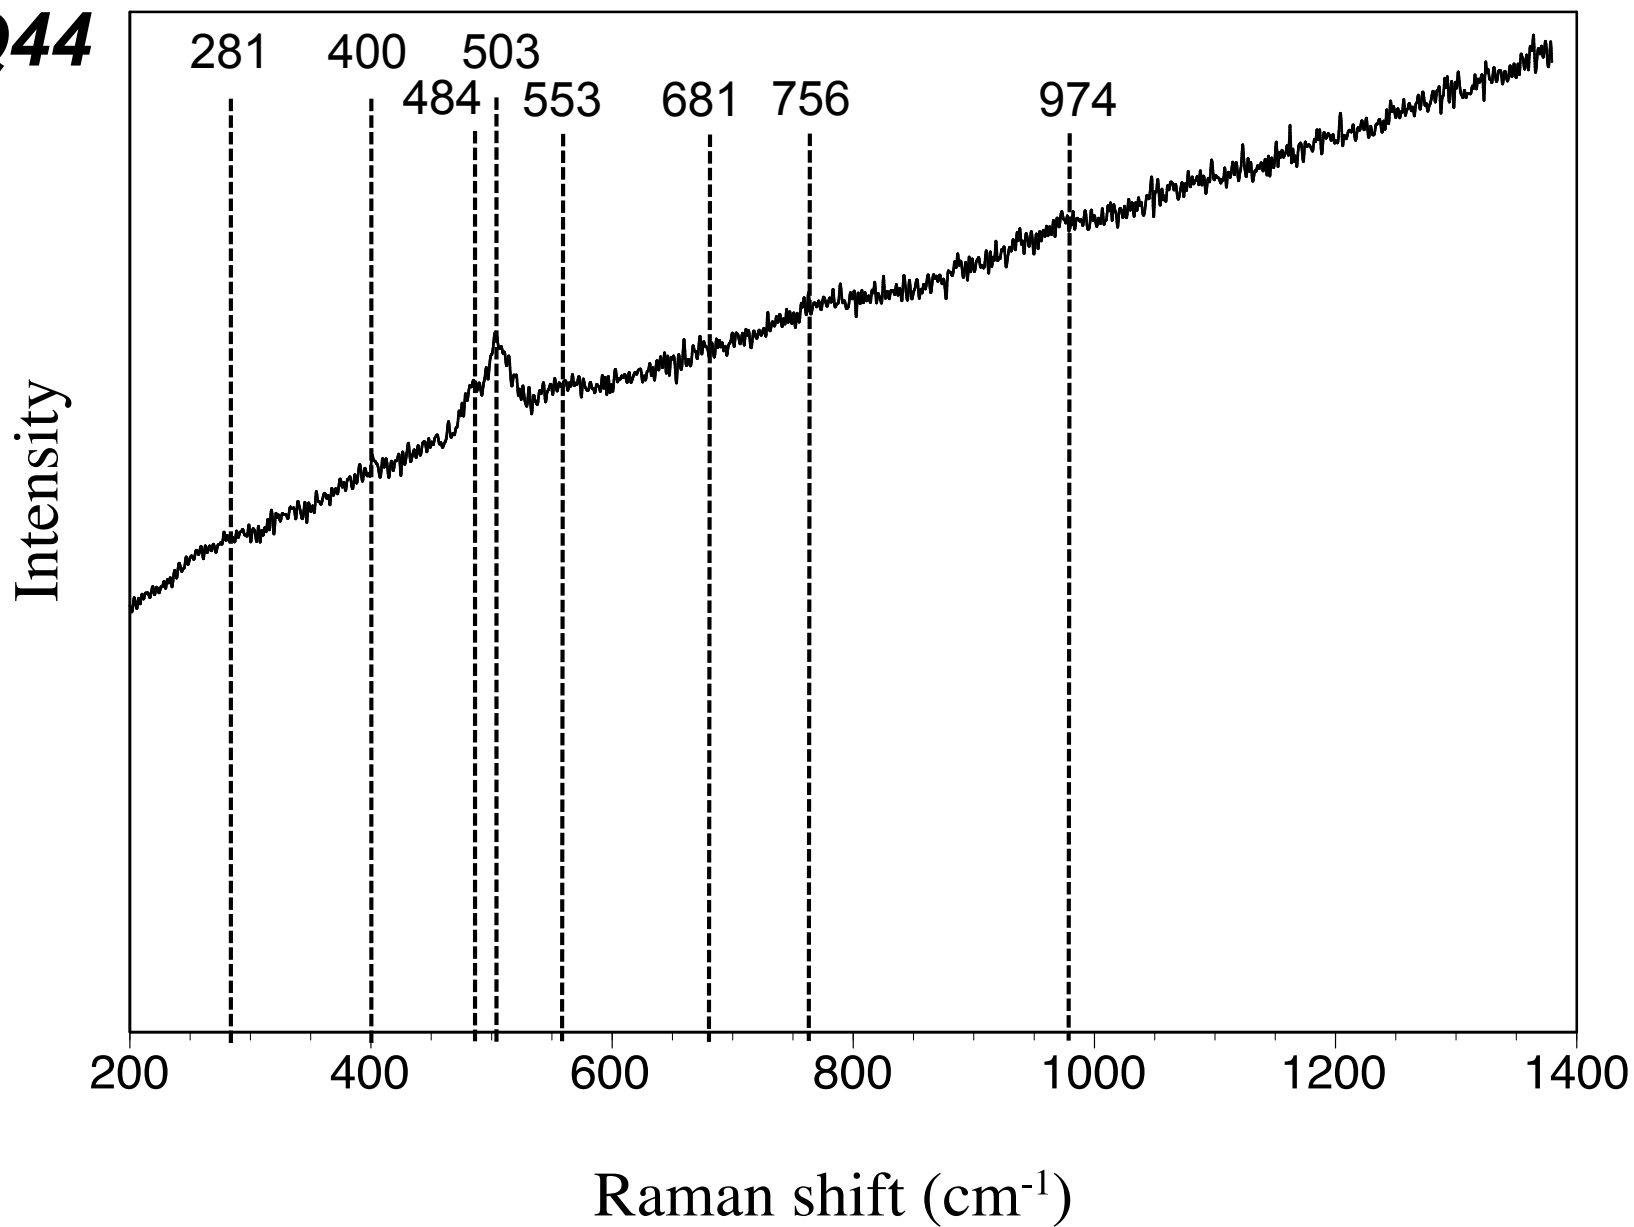

**M3**

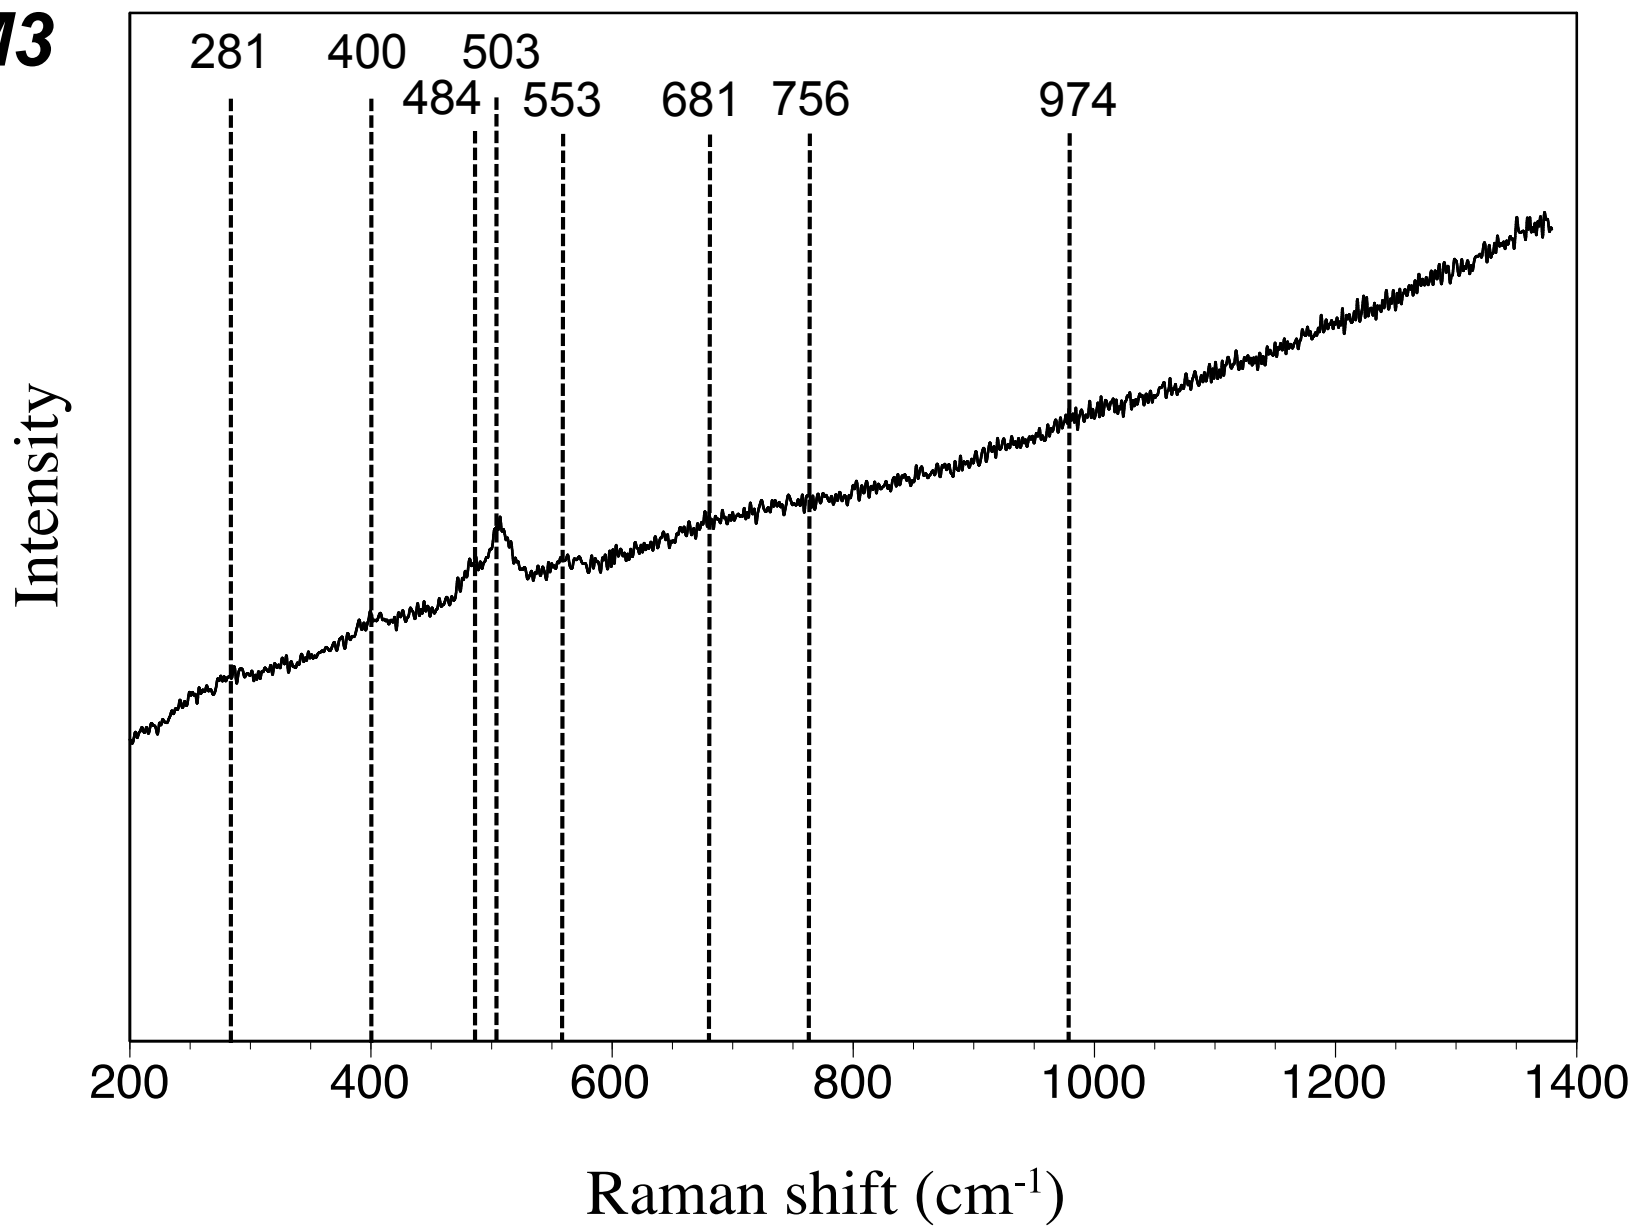

**M6**

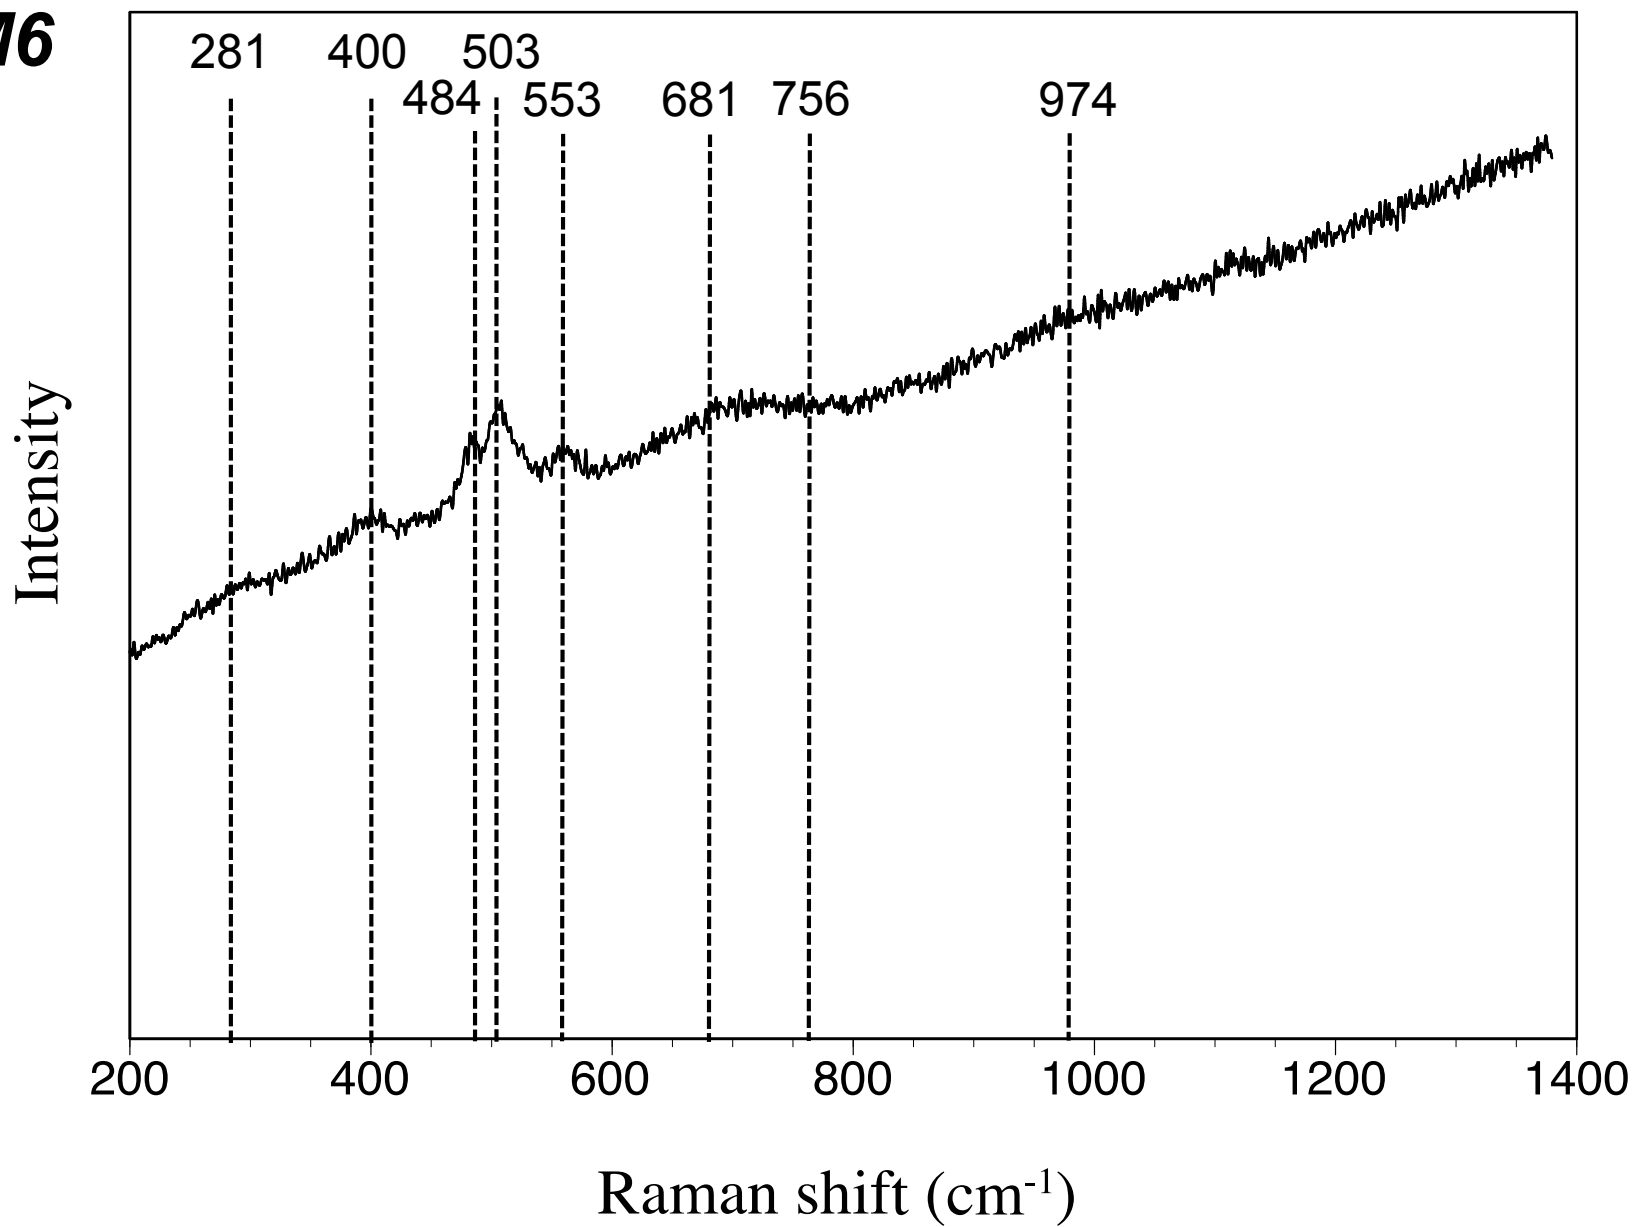

**M23**

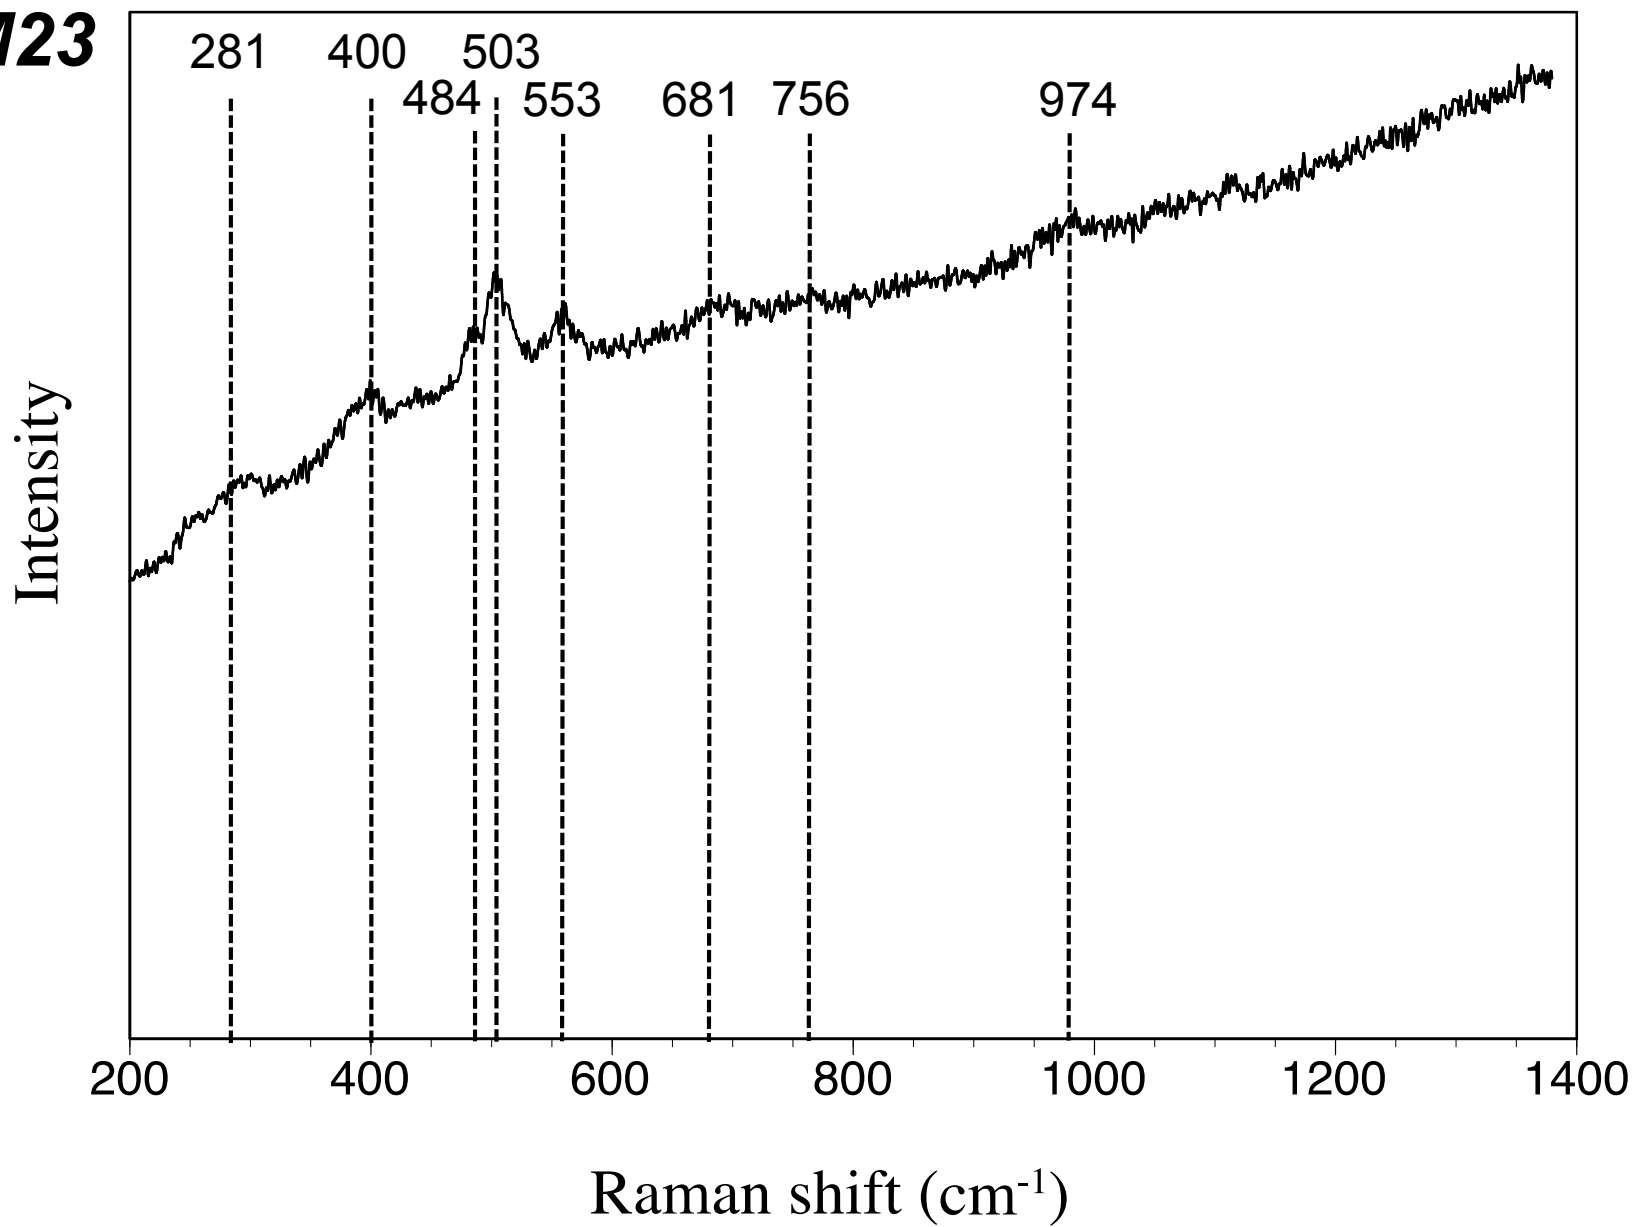

Supplement: NIHMS1567231-supplement-EA5.pdf [file NIHMS1567231-supplement-EA5.pdf]
